# Supplementary material for: The Global Burden of Leukemia and Its Attributable Factors in 204 Countries and Territories: Findings from the Global Burden of Disease 2019 Study and Projections to 2030
Source: Hindawi journal article supplement (doi:10.1155/2022/1612702), 2022-04-25
Supplement: f1 [file 1612702.f1.zip]

|                           |                                     |                         |                   |                                  |                   |                   |                                     |                            |                   |
|---------------------------|-------------------------------------|-------------------------|-------------------|----------------------------------|-------------------|-------------------|-------------------------------------|----------------------------|-------------------|
| Central Asia              | 5246.66<br>(4605.56, 6047.70)       | 6.05 (5.35, 6.93)       | -1.3 (-1.4, -1.1) | 3188.21<br>(2848.79, 3603.62)    | 3.89 (3.50, 4.37) | -1.0 (-1.2, -0.8) | 149495.54<br>(130533.91, 171440.83) | 164.44<br>(144.52, 188.23) | -1.6 (-1.7, -1.5) |
| Central Europe            | 17318.39<br>(15236.62, 19601.47)    | 9.59 (8.45, 10.87)      | 0.6 (0.5, 0.7)    | 9586.46<br>(8458.75, 10785.63)   | 4.85 (4.29, 5.45) | -0.5 (-0.7, -0.4) | 233129.47<br>(205859.87, 262478.34) | 144.97<br>(127.72, 163.98) | -1.1 (-1.3, -1.0) |
| Eastern Europe            | 21615.30<br>(19527.90, 23850.45)    | 7.54 (6.86, 8.29)       | -0.3 (-1.1, 0.5)  | 11746.14<br>(10640.14, 12897.19) | 3.90 (3.55, 4.28) | -1.0 (-1.6, -0.3) | 352317.04<br>(321016.55, 387489.21) | 139.99<br>(127.84, 153.03) | -1.7 (-2.4, -1.1) |
| Australasia               | 4717.22<br>(3814.35, 5798.72)       | 10.46 (8.44, 12.78)     | 0.3 (0.0, 0.7)    | 2367.33<br>(2121.00, 2571.30)    | 4.83 (4.39, 5.20) | -0.7 (-0.9, -0.6) | 49849.31<br>(46144.08, 53204.16)    | 123.87<br>(116.10, 131.44) | -1.2 (-1.3, -1.1) |
| High-income Asia Pacific  | 29195.95<br>(24933.06, 33270.91)    | 10.33 (8.98, 11.70)     | 0.5 (0.2, 0.7)    | 12116.94<br>(10458.88, 13028.23) | 3.02 (2.72, 3.22) | -1.5 (-1.6, -1.4) | 267329.03<br>(241668.10, 284478.41) | 98.21 (89.49, 104.91)      | -2.2 (-2.4, -2.0) |
| High-income North America | 61549.28<br>(53737.72, 70237.98)    | 10.69 (9.38, 12.13)     | -0.4 (-0.6, -0.2) | 34706.07<br>(32027.06, 36512.47) | 5.65 (5.28, 5.92) | -0.6 (-0.8, -0.5) | 738966.19<br>(703032.17, 769665.53) | 143.76<br>(138.05, 149.13) | -1.1 (-1.3, -1.0) |
| Southern Latin America    | 5386.76<br>(4272.51, 6699.70)       | 7.20 (5.71, 8.93)       | -0.1 (-0.4, 0.1)  | 3839.65<br>(3588.68, 4062.64)    | 4.90 (4.60, 5.18) | -0.6 (-0.7, -0.5) | 117863.65<br>(111407.17, 124877.42) | 166.92<br>(157.59, 177.31) | -0.9 (-1.1, -0.8) |
| Western Europe            | 118623.58<br>(102900.91, 135440.55) | 16.87<br>(14.68, 19.38) | 0.9 (0.7, 1.1)    | 44997.10<br>(39920.49, 47621.60) | 3.12 (2.54, 3.72) | -0.7 (-0.8, -0.6) | 893135.36<br>(828830.87, 940341.72) | 130.50<br>(123.33, 137.05) | -1.3 (-1.4, -1.2) |

|                              |                                     |                     |                   |                                  |                   |                   |                                         |                            |                   |
|------------------------------|-------------------------------------|---------------------|-------------------|----------------------------------|-------------------|-------------------|-----------------------------------------|----------------------------|-------------------|
| Andean Latin America         | 4423.47<br>(3233.64, 5622.19)       | 7.30 (5.33, 9.25)   | -0.1 (-0.5, 0.3)  | 3045.12<br>(2259.24, 3806.60)    | 5.15 (3.83, 6.42) | -0.4 (-0.6, -0.3) | 130139.26<br>(94644.63, 167106.98)      | 208.33<br>(151.88, 266.81) | -0.5 (-0.8, -0.1) |
| Caribbean                    | 3607.09<br>(2835.43, 4446.13)       | 7.56 (5.83, 9.49)   | -0.3 (-0.4, -0.1) | 2363.94<br>(1954.68, 2813.98)    | 4.82 (3.95, 5.81) | -0.4 (-0.6, -0.3) | 93167.95<br>(71599.39, 119464.24)       | 200.47<br>(151.14, 261.34) | -0.6 (-0.8, -0.5) |
| Central Latin America        | 15977.36<br>(13603.35, 18616.77)    | 6.58 (5.60, 7.67)   | -0.2 (-0.2, -0.2) | 10720.66<br>(9282.54, 12353.31)  | 4.45 (3.85, 5.13) | -0.3 (-0.3, -0.2) | 470070.93<br>(403984.34, 543365.40)     | 190.57<br>(163.81, 220.59) | -0.4 (-0.5, -0.4) |
| Tropical Latin America       | 12371.13<br>(11556.86, 13082.09)    | 5.53 (5.14, 5.88)   | -0.7 (-0.8, -0.7) | 9065.68<br>(8444.99, 9504.43)    | 3.97 (3.69, 4.19) | -0.6 (-0.7, -0.6) | 322893.06<br>(303422.06, 342799.74)     | 146.69<br>(137.01, 157.33) | -1.1 (-1.2, -1.0) |
| North Africa and Middle East | 39297.49<br>(32616.56, 45056.03)    | 7.76 (6.54, 8.84)   | -0.7 (-0.8, -0.6) | 25143.10<br>(21109.25, 28825.50) | 5.41 (4.62, 6.13) | -0.9 (-1.0, -0.8) | 1011554.80<br>(822536.76, 1173620.62 )  | 183.36<br>(150.69, 211.24) | -1.3 (-1.4, -1.3) |
| South Asia                   | 59855.88<br>(51906.53, 70104.64)    | 3.81 (3.32, 4.45)   | -0.8 (-1.0, -0.5) | 44550.51<br>(38745.01, 52631.28) | 2.98 (2.59, 3.50) | -0.8 (-1.1, -0.6) | 1847835.01<br>(1598397.83, 2192213.56 ) | 109.23<br>(94.33, 129.55)  | -1.3 (-1.5, -1.0) |
| East Asia                    | 159358.30<br>(131903.50, 185876.66) | 10.41 (8.69, 12.26) | -0.6 (-1.0, -0.3) | 62983.34<br>(52696.54, 73469.41) | 3.69 (3.12, 4.28) | -1.8 (-2.0, -1.6) | 2399037.72<br>(2014459.98, 2777481.26 ) | 164.06<br>(136.91, 189.20) | -2.4 (-2.6, -2.1) |

|                                 |                                     |                      |                       |                                     |                      |                       |                                              |                               |                       |
|---------------------------------|-------------------------------------|----------------------|-----------------------|-------------------------------------|----------------------|-----------------------|----------------------------------------------|-------------------------------|-----------------------|
| Oceania                         | 807.96<br>(533.04,<br>1224.88)      | 6.84 (4.80,<br>9.75) | -0.1 (-0.4,<br>0.1)   | 457.06<br>(330.30,<br>643.64)       | 4.79 (3.58,<br>6.48) | -0.3 (-0.5, -<br>0.1) | 24621.75<br>(17036.72,<br>36614.31)          | 192.00<br>(137.22,<br>272.19) | -0.3 (-0.5, -<br>0.1) |
| Southeast Asia                  | 42262.80<br>(35843.46,<br>49692.34) | 6.81 (5.80,<br>7.99) | -0.8 (-0.8, -<br>0.8) | 28502.48<br>(24414.64,<br>32955.74) | 4.74 (4.05,<br>5.47) | -0.7 (-0.7, -<br>0.6) | 1156787.74<br>(996181.59,<br>1344034.44<br>) | 178.88<br>(153.85,<br>208.04) | -1.1 (-1.2, -<br>1.1) |
| Central Sub-<br>Saharan Africa  | 4091.39<br>(3060.97,<br>5533.05)    | 3.89 (2.91,<br>4.98) | -1.2 (-1.3, -<br>1.0) | 2417.08<br>(1840.70,<br>3060.68)    | 2.99 (2.18,<br>4.04) | -0.8 (-0.9, -<br>0.7) | 132016.80<br>(97917.88,<br>177958.53)        | 110.28<br>(83.79,<br>139.41)  | -1.4 (-1.5, -<br>1.2) |
| Eastern Sub-<br>Saharan Africa  | 21547.86<br>(13995.26,<br>29459.80) | 5.85 (4.15,<br>7.71) | -1.2 (-1.3, -<br>1.1) | 12063.97<br>(8397.79,<br>15924.26)  | 4.37 (3.19,<br>5.61) | -1.0 (-1.1, -<br>0.9) | 727912.71<br>(475127.70,<br>980634.80)       | 173.01<br>(121.47,<br>228.39) | -1.7 (-1.8, -<br>1.5) |
| Southern Sub-<br>Saharan Africa | 2763.22<br>(2382.96,<br>3135.08)    | 4.34 (3.71,<br>4.86) | -0.1 (-0.2,<br>0.1)   | 1955.85<br>(1650.57,<br>2174.00)    | 3.35 (2.78,<br>3.73) | -0.2 (-0.6,<br>0.1)   | 71812.05<br>(62129.37,<br>81633.23)          | 102.98<br>(88.05,<br>115.55)  | -0.6 (-0.7, -<br>0.4) |
| Western Sub-<br>Saharan Africa  | 13561.93<br>(10265.05,<br>17280.77) | 3.90 (3.14,<br>4.68) | 0.1 (0.0,<br>0.2)     | 8775.57<br>(6931.93,<br>10830.65)   | 3.12 (2.54,<br>3.72) | 0.0 (-0.1,<br>0.1)    | 467611.32<br>(348733.42,<br>610675.24)       | 113.00<br>(88.91,<br>139.81)  | -0.2 (-0.3, -<br>0.1) |

Abbreviations: AAPC, average annual percentage change; CI, confidence interval; SDI, socio-demographic index; UI, uncertainty interval.

**Supplementary Table 2.** The numbers, age-standardized rates, and AAPCs in incidence, death and DALYs for leukemia in 204 countries and territories.

| Regions        | Incident cases                          |                             |                                | Deaths                             |                             |                                | DALYs                                 |                                                   |                                |
|----------------|-----------------------------------------|-----------------------------|--------------------------------|------------------------------------|-----------------------------|--------------------------------|---------------------------------------|---------------------------------------------------|--------------------------------|
|                | Number of incident cases, 2019 (95% UI) | ASIR/100,000, 2019 (95% UI) | AAPC (%) 1990 to 2019 (95% CI) | Number of deaths, 2019 (95% UI)    | ASDR/100,000, 2019 (95% UI) | AAPC (%) 1990 to 2019 (95% CI) | Number of DALYs, 2019 (95% UI)        | Age-standardized DALY rate/100,000, 2019 (95% UI) | AAPC (%) 1990 to 2019 (95% CI) |
| Afghanistan    | 3,360.19<br>(2,124.84, 5,172.16)        | 12.36 (8.39, 18.15)         | -0.6 (-0.8, -0.4)              | 10,591.49<br>(8,501.49, 12,911.01) | 10.01 (6.95, 14.38)         | -0.4 (-0.5, -0.3)              | 115,862.63<br>(74,512.38, 176,533.72) | 365.49 (241.81, 546.42)                           | -0.8 (-1.0, -0.6)              |
| Albania        | 280.31<br>(210.33, 371.65)              | 9.39 (7.18, 12.35)          | 1.2 (0.5, 1.8)                 | 4.01 (3.36, 4.88)                  | 4.19 (3.17, 5.55)           | -0.2 (-0.7, 0.3)               | 4,988.15<br>(3,739.31, 6,493.50)      | 178.59 (136.15, 226.78)                           | -0.1 (-0.7, 0.5)               |
| Algeria        | 1,508.80<br>(1,152.08, 1,876.04)        | 4.20 (3.25, 5.14)           | -0.9 (-1.1, -0.8)              | 261.70<br>(201.53, 361.63)         | 3.02 (2.35, 3.71)           | -1.2 (-1.3, -1.2)              | 38,065.28<br>(29,009.69, 47,473.56)   | 97.91 (75.39, 121.05)                             | -1.7 (-1.8, -1.6)              |
| American Samoa | 1.90 (1.51, 2.40)                       | 3.77 (3.03, 4.73)           | -0.4 (-0.6, -0.3)              | 21.84 (18.24, 25.91)               | 2.96 (2.42, 3.61)           | -0.6 (-0.7, -0.4)              | 53.33<br>(42.04, 68.76)               | 100.01 (79.41, 128.46)                            | -0.6 (-0.7, -0.4)              |

|                     |                               |                      |                   |                               |                   |                   |                                  |                         |                   |
|---------------------|-------------------------------|----------------------|-------------------|-------------------------------|-------------------|-------------------|----------------------------------|-------------------------|-------------------|
| Andorra             | 26.00 (19.21, 34.44)          | 22.71 (16.74, 30.34) | 1.3 (1.0, 1.5)    | 0.50 (0.35, 0.71)             | 6.28 (4.76, 7.97) | -0.7 (-0.8, -0.7) | 197.68 (147.96, 255.47)          | 174.45 (130.56, 226.22) | -0.9 (-0.9, -0.8) |
| Angola              | 1,120.86 (755.68, 1,543.51)   | 4.40 (3.28, 5.49)    | -1.2 (-1.4, -0.9) | 1,833.21 (1,623.58, 2,009.56) | 3.31 (2.45, 4.35) | -0.8 (-1.0, -0.5) | 35,937.11 (24,396.02, 49,184.83) | 124.63 (92.38, 156.71)  | -1.5 (-1.7, -1.2) |
| Antigua and Barbuda | 5.38 (4.50, 6.40)             | 6.07 (5.02, 7.29)    | 0.1 (-0.1, 0.3)   | 310.92 (276.27, 343.69)       | 4.27 (3.63, 5.01) | 0.0 (-0.3, 0.2)   | 130.56 (109.67, 157.03)          | 147.26 (121.85, 179.55) | -0.1 (-0.2, 0.0)  |
| Argentina           | 3,515.61 (2,787.11, 4,371.55) | 7.10 (5.63, 8.84)    | -0.2 (-0.5, 0.1)  | 229.69 (177.48, 283.73)       | 5.16 (4.80, 5.50) | -0.5 (-0.6, -0.4) | 82,885.68 (77,809.54, 88,133.01) | 175.47 (164.63, 186.96) | -0.9 (-1.1, -0.7) |
| Armenia             | 260.22 (218.65, 305.77)       | 7.62 (6.46, 8.88)    | -0.8 (-1.3, -0.3) | 1,040.47 (854.10, 1,240.43)   | 4.34 (3.69, 5.07) | -1.2 (-1.6, -0.7) | 5,657.01 (4,789.93, 6,593.90)    | 177.19 (151.68, 205.45) | -1.6 (-2.0, -1.1) |
| Australia           | 3,882.74 (2,992.80, 4,908.58) | 10.08 (7.82, 12.72)  | 0.3 (0.0, 0.7)    | 62.94 (43.76, 85.88)          | 4.79 (4.30, 5.18) | -0.8 (-1.0, -0.5) | 41,409.51 (37,867.79, 44,575.96) | 121.39 (112.21, 129.57) | -1.2 (-1.3, -1.1) |
| Austria             | 2,134.56 (1,719.33, 2,604.41) | 14.84 (11.96, 18.21) | 1.4 (1.0, 1.7)    | 233.73 (195.02, 276.69)       | 4.64 (4.18, 5.02) | -0.5 (-0.5, -0.4) | 16,826.80 (15,206.68, 18,128.14) | 121.22 (110.75, 130.24) | -1.0 (-1.1, -0.8) |

|            |                                     |                         |                       |                                        |                      |                       |                                                       |                            |                      |
|------------|-------------------------------------|-------------------------|-----------------------|----------------------------------------|----------------------|-----------------------|-------------------------------------------------------|----------------------------|----------------------|
| Azerbaijan | 828.90<br>(619.83,<br>1,083.81)     | 8.89 (6.62,<br>11.65)   | -0.7 (-1.2, -<br>0.2) | 157.49<br>(133.04,<br>186.36)          | 4.62 (3.56,<br>5.91) | -0.5 (-0.8, -<br>0.2) | 21,630.41<br>(16,155.62<br>,<br>28,146.48)            | 223.73 (166.71,<br>293.15) | -1.0 (-1.5,<br>-0.5) |
| Bahamas    | 19.45 (15.94,<br>24.16)             | 5.07 (4.16,<br>6.28)    | -0.2 (-0.7,<br>0.2)   | 31,378.14<br>(28,944.16,<br>33,015.60) | 3.67 (3.03,<br>4.48) | -0.4 (-0.8,<br>0.0)   | 538.76<br>(438.17,<br>667.67)                         | 139.95 (113.69,<br>173.17) | -0.4 (-1.0,<br>0.1)  |
| Bahrain    | 73.91 (57.64,<br>95.17)             | 7.67 (6.08,<br>9.49)    | -0.6 (-1.1, -<br>0.1) | 300.77<br>(202.20,<br>439.51)          | 5.49 (4.29,<br>6.84) | -1.3 (-2.0, -<br>0.7) | 1,706.45<br>(1,298.90,<br>2,233.97)                   | 147.82 (116.51,<br>183.74) | -1.6 (-2.0,<br>-1.2) |
| Bangladesh | 4,535.06<br>(3,360.65,<br>5,952.29) | 3.20 (2.38,<br>4.19)    | -1.8 (-2.2, -<br>1.5) | 222.56<br>(171.43,<br>280.44)          | 2.55 (1.86,<br>3.39) | -1.7 (-2.0, -<br>1.4) | 143,748.6<br>5<br>(106,557.1<br>5,<br>187,863.7<br>3) | 95.25 (70.98,<br>124.22)   | -2.2 (-2.5,<br>-1.9) |
| Barbados   | 28.14 (23.31,<br>33.83)             | 7.25 (5.94,<br>8.85)    | -0.1 (-0.6,<br>0.4)   | 187.08<br>(157.20,<br>221.66)          | 5.14 (4.27,<br>6.15) | -0.2 (-0.5,<br>0.2)   | 616.01<br>(507.87,<br>748.26)                         | 176.96 (145.53,<br>217.34) | -0.5 (-1.0,<br>0.0)  |
| Belarus    | 1,223.85<br>(962.40,<br>1,578.54)   | 9.31 (7.20,<br>11.90)   | -0.8 (-1.1, -<br>0.6) | 423.95<br>(379.74,<br>468.28)          | 4.58 (3.61,<br>5.84) | -2.0 (-2.3, -<br>1.8) | 18,605.83<br>(14,593.58<br>,<br>23,879.51)            | 157.63 (123.87,<br>201.98) | -3.1 (-3.2,<br>-3.0) |
| Belgium    | 2,625.87<br>(2,068.75,<br>3,296.37) | 13.97 (10.95,<br>17.54) | 0.7 (0.3, 1.0)        | 898.41<br>(829.69,<br>972.58)          | 5.26 (4.73,<br>5.72) | -1.0 (-1.2, -<br>0.8) | 23,618.96<br>(21,521.86                               | 131.09 (120.62,<br>141.58) | -1.4 (-1.6,<br>-1.2) |



|                                        |                                 |                       |                       |                                      |                      |                       |                                            |                            |                      |
|----------------------------------------|---------------------------------|-----------------------|-----------------------|--------------------------------------|----------------------|-----------------------|--------------------------------------------|----------------------------|----------------------|
|                                        |                                 |                       |                       |                                      |                      |                       | ,<br>25,635.77)                            |                            |                      |
| Belize                                 | 17.15 (14.82,<br>19.56)         | 4.79 (4.15,<br>5.46)  | -0.6 (-1.1, -<br>0.1) | 372.67<br>(271.26,<br>512.45)        | 3.34 (2.91,<br>3.77) | 0.0 (-0.2, 0.2)       | 503.38<br>(438.55,<br>572.54)              | 129.92 (113.14,<br>146.61) | -0.4 (-1.0,<br>0.1)  |
| Benin                                  | 501.38<br>(316.72,<br>770.38)   | 4.64 (3.22,<br>6.47)  | 0.3 (0.2, 0.4)        | 4,190.75<br>(3,706.89,<br>4,628.98)  | 3.55 (2.57,<br>4.75) | 0.2 (0.0, 0.3)        | 17,623.12<br>(11,106.12<br>,<br>27,420.07) | 139.27 (94.34,<br>199.94)  | 0.1 (-0.2,<br>0.4)   |
| Bermuda                                | 6.51 (5.46,<br>7.93)            | 6.97 (5.78,<br>8.50)  | -0.5 (-0.7, -<br>0.4) | 6.58 (5.66,<br>7.67)                 | 3.59 (3.03,<br>4.35) | -1.8 (-1.9, -<br>1.7) | 97.53<br>(81.65,<br>117.71)                | 119.38 (98.86,<br>144.40)  | -1.8 (-1.9,<br>-1.6) |
| Bhutan                                 | 25.98 (18.11,<br>36.94)         | 4.20 (2.98,<br>5.96)  | -0.5 (-0.8, -<br>0.3) | 3,503.00<br>(2,603.12,<br>4,614.39)  | 3.32 (2.34,<br>4.69) | -0.4 (-0.6, -<br>0.3) | 762.54<br>(510.48,<br>1,119.42)            | 113.80 (78.00,<br>165.14)  | -1.2 (-1.6,<br>-0.8) |
| Bolivia<br>(Plurinational<br>State of) | 945.76<br>(706.18,<br>1,217.60) | 8.81 (6.72,<br>11.18) | -0.5 (-0.6, -<br>0.3) | 89.12 (69.15,<br>109.29)             | 6.84 (5.31,<br>8.58) | -0.3 (-0.3, -<br>0.2) | 29,301.21<br>(21,317.31<br>,<br>38,015.10) | 253.39 (188.66,<br>323.15) | -0.9 (-1.0,<br>-0.7) |
| Bosnia and<br>Herzegovina              | 359.71<br>(273.95,<br>456.72)   | 7.16 (5.36,<br>9.08)  | 1.4 (1.0, 1.8)        | 9,336.28<br>(8,160.02,<br>10,277.91) | 4.22 (3.22,<br>5.28) | 0.5 (0.0, 0.9)        | 5,966.41<br>(4,418.05,<br>7,586.93)        | 136.72 (99.42,<br>173.80)  | 0.0 (-0.6,<br>0.6)   |
| Botswana                               | 102.15<br>(71.56,<br>138.00)    | 5.85 (4.07,<br>7.80)  | 1.1 (0.9, 1.2)        | 269.66<br>(203.74,<br>349.18)        | 4.19 (2.94,<br>5.58) | 0.5 (0.4, 0.6)        | 2,690.88<br>(1,869.02,<br>3,652.27)        | 136.01 (95.41,<br>182.11)  | 0.6 (0.4,<br>0.7)    |

|                      |                                        |                       |                       |                                      |                      |                       |                                                       |                            |                      |
|----------------------|----------------------------------------|-----------------------|-----------------------|--------------------------------------|----------------------|-----------------------|-------------------------------------------------------|----------------------------|----------------------|
| Brazil               | 11,993.65<br>(11,228.51,<br>12,641.67) | 5.52 (5.13,<br>5.86)  | -0.7 (-0.8, -<br>0.7) | 732.65<br>(638.52,<br>804.07)        | 3.96 (3.68,<br>4.16) | -0.7 (-0.9, -<br>0.6) | 312,188.1<br>2<br>(294,027.8<br>9,<br>330,198.8<br>9) | 146.35 (136.71,<br>156.49) | -1.1 (-1.3,<br>-1.0) |
| Brunei<br>Darussalam | 33.39 (27.99,<br>38.30)                | 9.20 (7.76,<br>10.48) | 0.1 (0.0, 0.3)        | 9,859.56<br>(8,419.32,<br>10,580.29) | 5.63 (4.82,<br>6.39) | -0.4 (-0.6, -<br>0.3) | 845.12<br>(688.11,<br>966.38)                         | 208.63 (171.43,<br>239.39) | -0.7 (-0.9,<br>-0.5) |
| Bulgaria             | 835.42<br>(665.03,<br>1,038.03)        | 8.17 (6.51,<br>10.06) | 0.1 (-0.3,<br>0.6)    | 2,657.68<br>(2,460.01,<br>2,838.52)  | 4.75 (3.80,<br>5.86) | 0.2 (0.0, 0.4)        | 15,502.76<br>(12,265.02<br>,<br>19,163.30)            | 172.80 (137.35,<br>213.26) | -0.5 (-0.8,<br>-0.2) |
| Burkina Faso         | 1,059.64<br>(620.67,<br>1,631.54)      | 5.06 (3.51,<br>7.01)  | 0.8 (0.6, 1.0)        | 563.18<br>(451.47,<br>694.80)        | 3.73 (2.80,<br>4.91) | 0.6 (0.4, 0.7)        | 35,902.89<br>(20,868.37<br>,<br>56,594.70)            | 150.62 (102.15,<br>212.98) | 0.7 (0.5,<br>0.9)    |
| Burundi              | 517.87<br>(287.73,<br>893.63)          | 4.49 (2.89,<br>6.96)  | -0.7 (-1.1, -<br>0.2) | 643.43<br>(504.49,<br>817.55)        | 3.26 (2.26,<br>4.63) | -0.5 (-0.9, -<br>0.1) | 16,991.78<br>(9,821.16,<br>28,958.12)                 | 133.18 (85.63,<br>204.40)  | -1.0 (-1.5,<br>-0.4) |
| Cabo Verde           | 26.23 (21.39,<br>32.79)                | 5.46 (4.51,<br>6.80)  | 0.8 (0.5, 1.1)        | 1,203.44<br>(795.74,<br>1,734.74)    | 4.04 (3.41,<br>4.93) | 1.0 (0.6, 1.4)        | 717.46<br>(570.64,<br>888.97)                         | 138.88 (112.69,<br>171.79) | 0.0 (-0.4,<br>0.4)   |
| Cambodia             | 1,199.37<br>(924.09,<br>1,522.79)      | 8.24 (6.48,<br>10.30) | -1.3 (-1.4, -<br>1.1) | 35.20 (25.74,<br>44.65)              | 5.92 (4.70,<br>7.24) | -1.1 (-1.2, -<br>0.9) | 33,988.96<br>(25,970.72                               | 219.11 (170.08,<br>275.68) | -1.7 (-1.8,<br>-1.5) |

|                                |                                           |                         |                       |                                     |                      |                       |                                            |                            |                      |
|--------------------------------|-------------------------------------------|-------------------------|-----------------------|-------------------------------------|----------------------|-----------------------|--------------------------------------------|----------------------------|----------------------|
|                                |                                           |                         |                       |                                     |                      |                       | ,<br>43,149.75)                            |                            |                      |
| Cameroon                       | 1,102.55<br>(723.15,<br>1,588.06)         | 4.96 (3.43,<br>6.85)    | 0.5 (0.3, 0.7)        | 13.92 (11.43,<br>17.09)             | 3.81 (2.67,<br>5.11) | 0.3 (0.2, 0.4)        | 37,166.17<br>(24,016.62<br>,<br>54,053.63) | 142.57 (95.11,<br>199.78)  | 0.4 (0.1,<br>0.6)    |
| Canada                         | 8,438.45<br>(6,506.22,<br>10,625.54)      | 15.10 (11.69,<br>19.02) | 0.6 (0.2, 1.1)        | 276.92<br>(214.58,<br>352.54)       | 4.96 (4.50,<br>5.38) | -0.8 (-1.0, -<br>0.7) | 70,304.06<br>(64,439.77<br>,<br>76,403.54) | 129.88 (120.23,<br>139.96) | -1.2 (-1.3,<br>-1.1) |
| Central<br>African<br>Republic | 234.40<br>(128.15,<br>413.23)             | 5.02 (3.23,<br>7.57)    | -0.5 (-0.6, -<br>0.4) | 921.24<br>(696.37,<br>1,156.51)     | 3.78 (2.63,<br>5.15) | -0.4 (-0.5, -<br>0.4) | 7,994.46<br>(4,584.51,<br>13,409.30)       | 153.27 (98.53,<br>235.37)  | -0.6 (-0.7,<br>-0.4) |
| Chad                           | 661.32<br>(425.83,<br>972.90)             | 4.65 (3.38,<br>6.11)    | 0.8 (0.7, 1.0)        | 266.55<br>(211.61,<br>334.39)       | 3.62 (2.69,<br>4.66) | 0.8 (0.7, 0.9)        | 23,626.26<br>(15,328.06<br>,<br>35,152.93) | 141.27 (100.00,<br>189.18) | 0.7 (0.5,<br>0.9)    |
| Chile                          | 1,497.49<br>(1,164.56,<br>1,886.38)       | 7.29 (5.67,<br>9.15)    | 0.7 (0.5, 1.0)        | 40.53 (29.68,<br>53.02)             | 4.13 (3.82,<br>4.46) | -0.5 (-0.7, -<br>0.3) | 27,943.04<br>(25,940.74<br>,<br>30,300.51) | 145.89 (134.13,<br>158.86) | -0.9 (-1.2,<br>-0.7) |
| China                          | 154,648.09<br>(127,207.43,<br>181,075.43) | 10.47 (8.70,<br>12.34)  | -0.6 (-1.0, -<br>0.3) | 2,658.89<br>(1,965.17,<br>3,469.43) | 3.67 (3.07,<br>4.28) | -1.8 (-2.0, -<br>1.7) | 2,309,312.<br>76<br>(1,924,583<br>.51,     | 163.82 (136.60,<br>189.48) | -2.4 (-2.7,<br>-2.2) |

|              |                                     |                        |                       |                               |                      |                       |                                             |                            |                      |
|--------------|-------------------------------------|------------------------|-----------------------|-------------------------------|----------------------|-----------------------|---------------------------------------------|----------------------------|----------------------|
|              |                                     |                        |                       |                               |                      |                       | 2,691,119.96)                               |                            |                      |
| Colombia     | 3,372.92<br>(2,621.88,<br>4,224.41) | 6.98 (5.43,<br>8.73)   | -0.1 (-0.4,<br>0.3)   | 8.78 (6.67,<br>10.66)         | 4.39 (3.42,<br>5.50) | -0.7 (-1.1, -<br>0.3) | 89,180.35<br>(69,081.25<br>,<br>111,721.12) | 190.35 (148.43,<br>237.81) | -0.6 (-0.9,<br>-0.2) |
| Comoros      | 27.36 (17.21,<br>42.45)             | 4.34 (2.88,<br>6.41)   | -0.1 (-1.1,<br>0.9)   | 3.84 (2.75,<br>5.13)          | 3.11 (2.22,<br>4.23) | 0.0 (-0.9, 0.9)       | 836.23<br>(506.42,<br>1,302.56)             | 123.89 (77.95,<br>188.66)  | -0.4 (-1.6,<br>0.9)  |
| Congo        | 158.44<br>(116.54,<br>212.16)       | 4.04 (3.03,<br>5.23)   | -1.1 (-1.4, -<br>0.8) | 0.09 (0.06,<br>0.11)          | 3.27 (2.43,<br>4.29) | -0.9 (-1.1, -<br>0.7) | 5,017.19<br>(3,605.98,<br>6,890.93)         | 111.40 (82.42,<br>148.22)  | -1.3 (-1.7,<br>-1.0) |
| Cook Islands | 0.68 (0.53,<br>0.86)                | 3.11 (2.36,<br>3.97)   | -1.1 (-1.2, -<br>1.1) | 514.36<br>(325.92,<br>743.71) | 2.34 (1.82,<br>2.91) | -1.2 (-1.3, -<br>1.1) | 15.21<br>(11.33,<br>19.44)                  | 73.45 (53.36,<br>95.34)    | -1.5 (-1.5,<br>-1.4) |
| Costa Rica   | 396.53<br>(305.16,<br>501.02)       | 8.05 (6.22,<br>10.17)  | 0.3 (0.0, 0.5)        | 729.28<br>(563.74,<br>917.48) | 5.11 (3.96,<br>6.37) | -0.6 (-1.0, -<br>0.3) | 8,816.84<br>(6,863.42,<br>11,157.64)        | 183.69 (143.26,<br>231.04) | -0.6 (-0.9,<br>-0.2) |
| Croatia      | 932.33<br>(727.82,<br>1,172.08)     | 12.74 (9.97,<br>15.97) | 1.0 (0.8, 1.2)        | 17.59 (11.80,<br>24.71)       | 4.81 (3.84,<br>5.98) | -0.5 (-0.9, -<br>0.1) | 8,787.49<br>(6,982.84,<br>11,055.00)        | 131.14 (104.73,<br>163.04) | -1.1 (-1.5,<br>-0.8) |
| Cuba         | 987.09<br>(798.67,<br>1,213.90)     | 6.47 (5.26,<br>7.92)   | -0.3 (-0.5,<br>0.0)   | 506.56<br>(328.03,<br>787.72) | 4.00 (3.28,<br>4.87) | -0.9 (-1.1, -<br>0.7) | 18,638.80<br>(15,164.19                     | 140.97 (115.25,<br>169.72) | -1.4 (-1.6,<br>-1.2) |

|                                                |                                     |                         |                       |                                     |                      |                       |                                                 |                            |                      |
|------------------------------------------------|-------------------------------------|-------------------------|-----------------------|-------------------------------------|----------------------|-----------------------|-------------------------------------------------|----------------------------|----------------------|
|                                                |                                     |                         |                       |                                     |                      |                       | ,<br>22,810.62)                                 |                            |                      |
| Cyprus                                         | 262.28<br>(207.47,<br>309.75)       | 15.82 (12.74,<br>18.64) | 2.2 (1.9, 2.6)        | 2,049.08<br>(1,514.31,<br>2,392.54) | 5.61 (4.02,<br>6.75) | -0.2 (-0.5,<br>0.1)   | 2,302.98<br>(1,737.51,<br>2,730.20)             | 139.78 (106.19,<br>164.92) | -0.5 (-0.8,<br>-0.3) |
| Czechia                                        | 2,110.18<br>(1,713.51,<br>2,541.48) | 11.39 (9.30,<br>13.79)  | 0.5 (0.2, 0.8)        | 4,142.89<br>(2,482.25,<br>5,700.41) | 5.07 (4.20,<br>6.07) | -1.1 (-1.4, -<br>0.8) | 22,326.48<br>(18,428.15<br>,<br>27,006.41)      | 131.07 (108.23,<br>159.33) | -1.8 (-2.1,<br>-1.5) |
| Côte d'Ivoire                                  | 867.28<br>(560.73,<br>1,260.25)     | 4.36 (3.05,<br>5.94)    | 0.1 (-0.1,<br>0.3)    | 1,391.29<br>(1,097.82,<br>1,805.48) | 3.48 (2.51,<br>4.57) | 0.0 (-0.1, 0.2)       | 30,674.04<br>(19,750.59<br>,<br>44,616.05)      | 129.52 (87.87,<br>180.32)  | 0.0 (-0.2,<br>0.2)   |
| Democratic<br>People's<br>Republic of<br>Korea | 2,035.53<br>(1,535.67,<br>2,652.33) | 7.60 (5.77,<br>9.85)    | -2.2 (-2.3, -<br>2.1) | 672.64<br>(447.58,<br>993.21)       | 4.49 (3.40,<br>5.81) | -1.2 (-1.3, -<br>1.2) | 53,840.13<br>(39,846.50<br>,<br>71,991.87)      | 199.98 (150.52,<br>266.09) | -1.7 (-1.8,<br>-1.7) |
| Democratic<br>Republic of<br>the Congo         | 2,487.71<br>(1,784.66,<br>3,470.78) | 3.61 (2.55,<br>4.85)    | -1.3 (-1.5, -<br>1.1) | 306.22<br>(206.93,<br>455.80)       | 2.81 (1.91,<br>3.96) | -0.9 (-0.9, -<br>0.8) | 80,303.92<br>(58,073.31<br>,<br>110,215.1<br>9) | 102.46 (72.74,<br>136.04)  | -1.5 (-1.6,<br>-1.3) |
| Denmark                                        | 1,240.03<br>(972.88,<br>1,563.60)   | 13.16 (10.30,<br>16.66) | -0.1 (-0.3,<br>0.2)   | 31.37 (19.69,<br>47.81)             | 5.06 (4.56,<br>5.59) | -1.6 (-1.8, -<br>1.4) | 11,592.02<br>(10,512.19                         | 127.35 (115.71,<br>139.43) | -2.4 (-2.7,<br>-2.0) |

|                       |                                     |                       |                       |                                     |                      |                     |                                                      |                            |                      |
|-----------------------|-------------------------------------|-----------------------|-----------------------|-------------------------------------|----------------------|---------------------|------------------------------------------------------|----------------------------|----------------------|
|                       |                                     |                       |                       |                                     |                      |                     | ,<br>12,751.15)                                      |                            |                      |
| Djibouti              | 58.82 (35.08,<br>93.32)             | 5.38 (3.52,<br>8.00)  | 0.4 (0.1, 0.8)        | 826.83<br>(730.52,<br>902.41)       | 3.66 (2.51,<br>5.27) | 0.5 (0.2, 0.8)      | 1,802.61<br>(1,055.98,<br>2,870.68)                  | 150.81 (93.43,<br>230.31)  | 0.2 (-0.1,<br>0.6)   |
| Dominica              | 6.44 (5.12,<br>7.98)                | 8.55 (6.72,<br>10.65) | 0.2 (0.0, 0.5)        | 1,494.00<br>(1,221.51,<br>1,682.80) | 6.39 (5.12,<br>7.83) | 0.1 (-0.1, 0.3)     | 173.36<br>(135.78,<br>218.05)                        | 245.07 (190.33,<br>308.46) | 0.1 (-0.1,<br>0.4)   |
| Dominican<br>Republic | 590.32<br>(425.30,<br>814.62)       | 5.79 (4.19,<br>7.95)  | 0.1 (-0.4,<br>0.5)    | 767.68<br>(579.96,<br>968.29)       | 4.05 (2.93,<br>5.51) | 0.4 (0.1, 0.7)      | 16,643.39<br>(12,057.16<br>,<br>22,859.59)           | 157.64 (114.91,<br>216.49) | -0.2 (-0.5,<br>0.1)  |
| Ecuador               | 1,293.10<br>(985.56,<br>1,620.32)   | 7.81 (5.95,<br>9.83)  | 0.4 (0.0, 0.8)        | 1,986.49<br>(1,762.69,<br>2,174.32) | 5.75 (4.34,<br>7.21) | 0.3 (0.0, 0.6)      | 40,263.53<br>(30,040.69<br>,<br>50,473.92)           | 231.51 (172.79,<br>289.73) | 0.1 (-0.3,<br>0.5)   |
| Egypt                 | 4,067.52<br>(2,929.86,<br>5,603.62) | 4.98 (3.55,<br>6.83)  | -0.3 (-0.7,<br>0.0)   | 8,796.02<br>(8,198.71,<br>9,216.58) | 3.78 (2.63,<br>5.33) | -0.2 (-0.5,<br>0.0) | 122,215.2<br>1<br>(88,205.20<br>,<br>168,711.7<br>5) | 136.07 (99.78,<br>183.29)  | -0.8 (-0.9,<br>-0.7) |
| El Salvador           | 447.24<br>(322.83,<br>584.62)       | 7.30 (5.26,<br>9.57)  | -0.7 (-1.0, -<br>0.5) | 3.93 (3.35,<br>4.61)                | 4.84 (3.51,<br>6.28) | -0.1 (-0.2,<br>0.0) | 11,752.79<br>(8,537.57,<br>15,390.82)                | 188.95 (137.16,<br>248.10) | -0.8 (-1.0,<br>-0.5) |

|                   |                                |                     |                   |                               |                    |                   |                                     |                         |                   |
|-------------------|--------------------------------|---------------------|-------------------|-------------------------------|--------------------|-------------------|-------------------------------------|-------------------------|-------------------|
| Equatorial Guinea | 32.93 (19.21, 54.11)           | 3.65 (2.21, 5.57)   | -1.1 (-1.5, -0.7) | 18.56 (15.58, 22.60)          | 2.92 (1.79, 4.39)  | -0.8 (-1.1, -0.5) | 1,048.04 (602.27, 1,697.16)         | 94.23 (55.78, 147.54)   | -1.8 (-2.2, -1.4) |
| Eritrea           | 274.61 (163.86, 460.49)        | 4.89 (3.22, 7.40)   | 0.3 (0.1, 0.5)    | 8.47 (6.43, 10.73)            | 3.59 (2.49, 5.03)  | 0.4 (0.2, 0.7)    | 9,236.21 (5,428.82, 15,337.84)      | 145.33 (93.17, 223.93)  | 0.0 (-0.2, 0.3)   |
| Estonia           | 252.95 (195.23, 318.42)        | 12.08 (9.41, 15.07) | 0.3 (-0.3, 0.9)   | 18.99 (15.91, 21.60)          | 5.62 (4.38, 6.96)  | -0.9 (-1.6, -0.1) | 3,147.91 (2,446.49, 3,913.19)       | 169.17 (135.61, 208.38) | -1.7 (-2.5, -0.8) |
| Eswatini          | 41.57 (28.23, 56.43)           | 5.11 (3.56, 6.85)   | 0.5 (0.2, 0.7)    | 2,805.52 (2,033.65, 3,774.01) | 4.11 (2.87, 5.46)  | 0.3 (0.1, 0.6)    | 1,261.37 (848.50, 1,726.98)         | 134.04 (90.64, 183.77)  | 0.3 (0.1, 0.6)    |
| Ethiopia          | 8,307.56 (4,274.41, 12,435.50) | 9.50 (5.31, 13.36)  | -2.1 (-2.2, -2.0) | 294.58 (211.36, 381.35)       | 7.74 (4.51, 10.92) | -1.8 (-1.9, -1.7) | 305,609.29 (159,473.60, 444,030.12) | 290.14 (163.46, 397.21) | -2.7 (-3.0, -2.3) |
| Fiji              | 68.87 (53.13, 88.41)           | 8.53 (6.66, 10.82)  | -0.3 (-0.5, -0.2) | 435.05 (333.14, 565.67)       | 6.47 (5.07, 8.10)  | -0.6 (-0.7, -0.4) | 2,173.54 (1,674.84, 2,787.81)       | 247.57 (191.70, 315.24) | -0.5 (-0.7, -0.4) |
| Finland           | 972.41 (760.36, 1,233.02)      | 10.63 (8.30, 13.49) | 0.5 (0.2, 0.7)    | 1,631.49 (1,436.38, 1,768.25) | 3.60 (3.29, 3.92)  | -1.3 (-1.4, -1.1) | 8,702.17 (7,922.07, 9,550.04)       | 101.13 (92.61, 110.50)  | -1.6 (-1.8, -1.4) |

|         |                                        |                         |                       |                                        |                      |                       |                                                       |                            |                      |
|---------|----------------------------------------|-------------------------|-----------------------|----------------------------------------|----------------------|-----------------------|-------------------------------------------------------|----------------------------|----------------------|
| France  | 17,595.52<br>(13,871.65,<br>21,913.58) | 16.08 (12.74,<br>20.31) | 1.2 (1.0, 1.4)        | 1.97 (1.57,<br>2.42)                   | 5.32 (4.70,<br>5.82) | -0.7 (-0.9, -<br>0.6) | 141,857.6<br>2<br>(127,383.4<br>1,<br>155,130.4<br>5) | 134.70 (123.72,<br>145.71) | -1.3 (-1.4,<br>-1.1) |
| Gabon   | 57.05 (40.13,<br>74.26)                | 4.20 (2.97,<br>5.34)    | -0.8 (-1.0, -<br>0.6) | 1,102.57<br>(939.22,<br>1,312.00)      | 3.33 (2.35,<br>4.27) | -0.6 (-0.7, -<br>0.4) | 1,716.09<br>(1,188.13,<br>2,286.21)                   | 112.17 (78.67,<br>146.34)  | -1.1 (-1.3,<br>-0.8) |
| Gambia  | 47.78 (33.73,<br>63.56)                | 3.16 (2.37,<br>3.95)    | 0.3 (-0.6,<br>1.2)    | 1,237.75<br>(1,075.92,<br>1,362.49)    | 2.67 (2.04,<br>3.30) | 0.3 (-0.5, 1.1)       | 1,667.20<br>(1,146.34,<br>2,300.97)                   | 91.98 (66.73,<br>118.06)   | 0.1 (-0.8,<br>1.1)   |
| Georgia | 334.33<br>(278.47,<br>391.90)          | 7.64 (6.40,<br>8.94)    | -1.4 (-2.1, -<br>0.6) | 1.40 (1.13,<br>1.71)                   | 4.82 (4.06,<br>5.68) | -0.7 (-1.4,<br>0.0)   | 7,961.66<br>(6,681.34,<br>9,331.24)                   | 197.88 (167.99,<br>230.27) | -1.5 (-2.1,<br>-0.9) |
| Germany | 32,361.45<br>(25,105.35,<br>41,856.15) | 21.91 (17.17,<br>28.45) | 1.5 (1.2, 1.8)        | 33,826.81<br>(28,763.84,<br>40,416.20) | 4.88 (4.38,<br>5.31) | -0.4 (-0.6, -<br>0.1) | 189,021.0<br>6<br>(170,843.4<br>0,<br>207,065.0<br>7) | 131.29 (120.84,<br>142.41) | -1.0 (-1.1,<br>-0.9) |
| Ghana   | 850.97<br>(614.84,<br>1,119.34)        | 3.58 (2.74,<br>4.58)    | -0.8 (-1.0, -<br>0.6) | 4.42 (2.53,<br>6.52)                   | 2.91 (2.30,<br>3.67) | -0.9 (-1.0, -<br>0.8) | 29,581.16<br>(20,674.22<br>,<br>39,425.95)            | 106.22 (78.54,<br>138.08)  | -1.3 (-1.5,<br>-1.1) |



|               |                                     |                         |                       |                               |                      |                       |                                            |                            |                      |
|---------------|-------------------------------------|-------------------------|-----------------------|-------------------------------|----------------------|-----------------------|--------------------------------------------|----------------------------|----------------------|
| Greece        | 3,269.06<br>(2,598.50,<br>4,044.78) | 17.73 (13.86,<br>22.23) | 1.1 (0.6, 1.5)        | 156.88<br>(100.77,<br>242.87) | 6.59 (5.95,<br>7.05) | -0.2 (-0.7,<br>0.2)   | 29,842.19<br>(27,180.98<br>,<br>32,142.11) | 168.83 (155.89,<br>181.27) | -0.5 (-0.7,<br>-0.4) |
| Greenland     | 2.88 (2.30,<br>3.57)                | 4.43 (3.56,<br>5.51)    | -0.7 (-1.0, -<br>0.5) | 139.08<br>(122.26,<br>158.06) | 3.20 (2.57,<br>3.94) | -1.3 (-1.5, -<br>1.0) | 54.95<br>(43.08,<br>69.10)                 | 86.03 (67.38,<br>108.77)   | -1.6 (-2.0,<br>-1.1) |
| Grenada       | 6.25 (5.54,<br>6.97)                | 5.99 (5.31,<br>6.73)    | -0.9 (-1.1, -<br>0.6) | 248.17<br>(171.96,<br>336.86) | 4.28 (3.84,<br>4.73) | -1.0 (-1.2, -<br>0.8) | 157.19<br>(137.25,<br>176.72)              | 149.56 (131.65,<br>168.13) | -1.3 (-1.6,<br>-1.0) |
| Guam          | 8.82 (7.12,<br>10.70)               | 5.01 (4.06,<br>6.05)    | -0.8 (-1.2, -<br>0.3) | 407.95<br>(323.81,<br>507.42) | 3.34 (2.72,<br>4.08) | -1.2 (-1.8, -<br>0.7) | 219.85<br>(178.47,<br>270.25)              | 126.31 (102.61,<br>155.09) | -0.9 (-1.1,<br>-0.7) |
| Guatemala     | 1,119.44<br>(869.52,<br>1,405.79)   | 6.91 (5.40,<br>8.64)    | 0.6 (0.1, 1.0)        | 78.88 (59.57,<br>102.82)      | 4.89 (3.80,<br>6.10) | 0.9 (0.4, 1.3)        | 37,100.24<br>(28,869.07<br>,<br>46,534.89) | 211.05 (164.15,<br>264.20) | 0.6 (0.1,<br>1.2)    |
| Guinea        | 318.41<br>(232.02,<br>425.58)       | 3.34 (2.51,<br>4.25)    | 0.1 (-0.1,<br>0.3)    | 287.24<br>(198.92,<br>416.41) | 2.80 (2.11,<br>3.53) | 0.1 (0.0, 0.2)        | 11,884.36<br>(8,479.52,<br>16,120.36)      | 103.63 (76.48,<br>133.59)  | -0.1 (-0.3,<br>0.2)  |
| Guinea-Bissau | 67.03 (48.66,<br>92.62)             | 5.02 (3.74,<br>6.78)    | -0.3 (-0.4, -<br>0.1) | 270.24<br>(220.65,<br>324.15) | 4.09 (3.07,<br>5.44) | -0.2 (-0.3, -<br>0.1) | 2,401.17<br>(1,737.96,<br>3,306.08)        | 150.17 (111.08,<br>201.49) | -0.5 (-0.8,<br>-0.3) |
| Guyana        | 34.91 (26.81,<br>44.81)             | 4.90 (3.78,<br>6.25)    | -0.2 (-0.5,<br>0.2)   | 185.87<br>(144.46,<br>232.82) | 3.87 (3.01,<br>4.89) | -0.2 (-0.5,<br>0.1)   | 1,173.81<br>(902.95,<br>1,510.70)          | 156.01 (120.56,<br>200.30) | 0.0 (-0.6,<br>0.6)   |

|           |                                        |                         |                       |                                     |                      |                       |                                                             |                            |                      |
|-----------|----------------------------------------|-------------------------|-----------------------|-------------------------------------|----------------------|-----------------------|-------------------------------------------------------------|----------------------------|----------------------|
| Haiti     | 1,087.82<br>(544.28,<br>1,858.56)      | 9.40 (5.14,<br>15.21)   | -1.1 (-1.3, -<br>1.0) | 5,265.41<br>(2,912.09,<br>7,253.87) | 6.40 (4.09,<br>9.58) | -0.9 (-1.0, -<br>0.8) | 36,836.38<br>(20,218.80<br>,<br>61,572.02)                  | 294.11 (168.51,<br>475.78) | -1.3 (-1.4,<br>-1.1) |
| Honduras  | 606.94<br>(448.72,<br>801.15)          | 7.83 (6.06,<br>10.01)   | -0.5 (-0.6, -<br>0.5) | 21.10 (17.01,<br>25.61)             | 6.28 (4.83,<br>7.97) | -0.1 (-0.3,<br>0.2)   | 18,641.69<br>(13,386.50<br>,<br>24,840.67)                  | 216.06 (161.02,<br>281.01) | -1.2 (-1.3,<br>-1.1) |
| Hungary   | 1,720.33<br>(1,410.27,<br>2,061.21)    | 10.52 (8.62,<br>12.70)  | 0.4 (0.0, 0.8)        | 228.05<br>(169.14,<br>292.58)       | 5.27 (4.40,<br>6.28) | -1.1 (-1.3, -<br>1.0) | 22,037.23<br>(18,200.75<br>,<br>26,442.30)                  | 152.94 (126.73,<br>184.02) | -1.4 (-1.7,<br>-1.1) |
| Iceland   | 57.41 (48.49,<br>67.04)                | 12.40 (10.49,<br>14.46) | 0.3 (0.2, 0.5)        | 1,334.28<br>(1,099.03,<br>1,611.25) | 3.67 (3.17,<br>4.16) | -0.8 (-1.0, -<br>0.6) | 453.81<br>(396.81,<br>512.82)                               | 101.56 (88.27,<br>115.57)  | -1.1 (-1.4,<br>-0.9) |
| India     | 43,570.33<br>(37,235.04,<br>52,165.15) | 3.56 (3.03,<br>4.25)    | -0.9 (-1.2, -<br>0.6) | 266.10<br>(204.10,<br>347.81)       | 2.87 (2.44,<br>3.42) | -0.9 (-1.3, -<br>0.5) | 1,312,881.<br>13<br>(1,115,465<br>.62,<br>1,600,749.<br>10) | 100.48 (85.30,<br>122.30)  | -1.5 (-1.9,<br>-1.1) |
| Indonesia | 15,268.89<br>(12,252.32,<br>18,468.14) | 6.71 (5.42,<br>8.08)    | -1.0 (-1.0, -<br>0.9) | 633.09<br>(562.67,<br>696.24)       | 4.93 (3.99,<br>5.95) | -0.5 (-0.5, -<br>0.4) | 437,885.0<br>9<br>(351,929.0<br>3,                          | 180.52 (145.51,<br>220.76) | -1.3 (-1.3,<br>-1.2) |

|                            |                                     |                      |                   |                                  |                   |                   |                                        |                         |                   |
|----------------------------|-------------------------------------|----------------------|-------------------|----------------------------------|-------------------|-------------------|----------------------------------------|-------------------------|-------------------|
|                            |                                     |                      |                   |                                  |                   |                   | 538,978.86)                            |                         |                   |
| Iran (Islamic Republic of) | 6,766.76<br>(4,646.38, 7,890.11)    | 8.85 (6.17, 10.29)   | -1.0 (-1.3, -0.7) | 380.84<br>(344.27, 409.44)       | 6.04 (4.31, 6.85) | -1.1 (-1.3, -1.0) | 162,850.27<br>(110,681.46, 188,806.16) | 205.30 (140.29, 237.81) | -1.6 (-1.8, -1.4) |
| Iraq                       | 3,175.25<br>(2,441.22, 3,968.43)    | 9.89 (7.69, 12.30)   | -0.8 (-1.0, -0.5) | 135.50<br>(86.62, 209.51)        | 6.95 (5.40, 8.75) | -0.6 (-0.8, -0.3) | 79,420.60<br>(61,872.41, 100,139.39)   | 227.60 (176.92, 283.88) | -1.2 (-1.4, -0.9) |
| Ireland                    | 968.88<br>(750.66, 1,214.22)        | 15.06 (11.70, 18.92) | 1.4 (0.9, 1.9)    | 622.18<br>(545.48, 706.37)       | 4.25 (3.81, 4.67) | -1.2 (-1.4, -1.0) | 7,031.29<br>(6,350.22, 7,727.06)       | 109.90 (99.90, 120.52)  | -1.4 (-1.7, -1.1) |
| Israel                     | 1,611.78<br>(1,250.96, 2,026.82)    | 14.78 (11.37, 18.70) | 1.1 (0.8, 1.4)    | 1,290.24<br>(1,012.10, 1,656.11) | 6.24 (5.50, 6.80) | -0.7 (-0.9, -0.4) | 16,371.11<br>(14,844.69, 17,737.29)    | 154.42 (141.13, 166.92) | -1.1 (-1.4, -0.8) |
| Italy                      | 20,460.65<br>(17,021.34, 24,398.78) | 20.87 (17.47, 24.82) | 0.9 (0.7, 1.1)    | 5.85 (5.10, 6.73)                | 5.10 (4.61, 5.38) | -0.9 (-1.0, -0.8) | 142,984.84<br>(129,985.22,             | 146.68 (137.03, 155.08) | -1.4 (-1.7, -1.2) |

|            |                                        |                        |                       |                               |                      |                       |                                                       |                            |                      |
|------------|----------------------------------------|------------------------|-----------------------|-------------------------------|----------------------|-----------------------|-------------------------------------------------------|----------------------------|----------------------|
|            |                                        |                        |                       |                               |                      |                       | 151,720.8<br>6)                                       |                            |                      |
| Jamaica    | 183.85<br>(142.70,<br>231.91)          | 6.36 (4.94,<br>8.03)   | 1.2 (0.3, 2.2)        | 8.14 (6.87,<br>9.52)          | 4.45 (3.47,<br>5.57) | 1.4 (0.4, 2.5)        | 4,848.27<br>(3,753.67,<br>6,180.31)                   | 170.67 (132.24,<br>217.06) | 1.1 (-0.3,<br>2.5)   |
| Japan      | 22,630.29<br>(19,076.10,<br>26,390.13) | 10.81 (9.34,<br>12.49) | 0.5 (0.4, 0.7)        | 283.37<br>(256.80,<br>312.02) | 3.09 (2.79,<br>3.25) | -1.3 (-1.4, -<br>1.1) | 200,775.5<br>7<br>(181,948.2<br>2,<br>211,813.4<br>0) | 97.52 (92.15,<br>102.16)   | -1.9 (-2.0,<br>-1.8) |
| Jordan     | 868.92<br>(708.22,<br>1,074.47)        | 9.86 (7.99,<br>11.92)  | -0.6 (-0.7, -<br>0.4) | 378.33<br>(274.73,<br>483.75) | 6.62 (5.29,<br>7.99) | -0.9 (-1.3, -<br>0.5) | 17,937.39<br>(14,616.00<br>,<br>21,885.12)            | 191.83 (155.84,<br>229.55) | -1.3 (-1.5,<br>-1.1) |
| Kazakhstan | 978.09<br>(854.43,<br>1,116.24)        | 5.45 (4.77,<br>6.19)   | -1.2 (-1.4, -<br>0.9) | 454.07<br>(365.39,<br>541.70) | 3.56 (3.13,<br>4.04) | -1.2 (-1.5, -<br>1.0) | 25,578.25<br>(22,415.09<br>,<br>29,104.04)            | 140.32 (123.18,<br>159.52) | -1.9 (-2.1,<br>-1.6) |
| Kenya      | 1,276.92<br>(931.84,<br>1,678.85)      | 3.25 (2.51,<br>4.15)   | -0.4 (-0.7, -<br>0.1) | 138.69<br>(106.26,<br>171.62) | 2.53 (1.97,<br>3.19) | 0.1 (-0.1, 0.3)       | 42,338.15<br>(30,049.00<br>,<br>55,757.66)            | 95.22 (70.82,<br>122.24)   | -0.4 (-0.7,<br>-0.1) |

|                                  |                         |                     |                   |                               |                   |                   |                                 |                         |                   |
|----------------------------------|-------------------------|---------------------|-------------------|-------------------------------|-------------------|-------------------|---------------------------------|-------------------------|-------------------|
| Kiribati                         | 5.99 (4.52, 8.02)       | 5.92 (4.57, 7.48)   | -0.5 (-0.7, -0.3) | 4,424.32 (3,137.38, 5,029.79) | 4.43 (3.51, 5.63) | -0.5 (-0.6, -0.3) | 188.62 (142.08, 250.69)         | 171.26 (131.59, 219.89) | -0.6 (-0.9, -0.4) |
| Kuwait                           | 218.40 (182.10, 263.92) | 6.88 (5.68, 8.39)   | -0.7 (-1.6, 0.3)  | 47.94 (36.94, 60.73)          | 3.62 (3.01, 4.39) | -1.6 (-2.8, -0.4) | 3,752.15 (3,150.75, 4,501.22)   | 110.42 (92.39, 133.64)  | -1.9 (-2.6, -1.2) |
| Kyrgyzstan                       | 227.63 (200.43, 259.80) | 3.94 (3.47, 4.49)   | -2.2 (-2.5, -2.0) | 63.92 (44.42, 86.13)          | 2.85 (2.50, 3.24) | -1.6 (-2.0, -1.3) | 7,122.94 (6,267.21, 8,061.15)   | 113.99 (100.39, 129.02) | -2.5 (-2.8, -2.2) |
| Lao People's Democratic Republic | 468.07 (328.39, 625.31) | 7.64 (5.48, 9.95)   | -1.9 (-2.1, -1.7) | 2.43 (1.90, 2.97)             | 5.50 (4.09, 7.01) | -1.6 (-1.7, -1.5) | 14,270.60 (9,966.87, 18,907.18) | 214.01 (153.26, 280.80) | -2.2 (-2.4, -2.0) |
| Latvia                           | 297.87 (243.05, 362.60) | 9.37 (7.70, 11.35)  | -0.6 (-1.3, 0.2)  | 26.38 (20.31, 33.63)          | 5.02 (4.13, 6.05) | -1.4 (-2.2, -0.5) | 4,322.74 (3,556.57, 5,224.06)   | 162.15 (132.78, 196.97) | -2.1 (-2.8, -1.3) |
| Lebanon                          | 622.37 (494.32, 791.48) | 12.06 (9.60, 15.26) | 0.5 (0.4, 0.6)    | 3.78 (2.91, 4.79)             | 6.52 (5.15, 8.53) | -1.0 (-1.1, -0.9) | 10,497.59 (8,232.37, 13,119.50) | 203.88 (160.37, 254.39) | -1.1 (-1.1, -1.0) |
| Lesotho                          | 84.46 (58.76, 116.02)   | 5.40 (3.81, 7.35)   | 1.5 (1.4, 1.6)    | 285.12 (261.26, 303.31)       | 4.53 (3.18, 6.11) | 1.4 (1.3, 1.6)    | 2,550.01 (1,751.07, 3,555.00)   | 145.15 (100.02, 199.82) | 1.4 (1.3, 1.5)    |
| Liberia                          | 133.70 (90.50, 183.23)  | 3.86 (2.65, 5.20)   | -0.8 (-1.0, -0.5) | 161.86 (118.86, 213.82)       | 3.15 (2.18, 4.23) | -0.5 (-0.7, -0.3) | 4,680.27 (3,142.13, 6,391.17)   | 113.35 (77.85, 153.04)  | -1.1 (-1.4, -0.8) |

|            |                                     |                         |                       |                                     |                      |                       |                                            |                            |                      |
|------------|-------------------------------------|-------------------------|-----------------------|-------------------------------------|----------------------|-----------------------|--------------------------------------------|----------------------------|----------------------|
| Libya      | 387.77<br>(304.26,<br>498.88)       | 6.92 (5.45,<br>8.74)    | -0.5 (-0.8, -<br>0.3) | 56.66 (38.62,<br>81.47)             | 5.18 (4.00,<br>6.49) | -0.6 (-1.0, -<br>0.3) | 10,282.91<br>(7,998.55,<br>13,282.17)      | 168.55 (131.72,<br>214.29) | -0.9 (-1.2,<br>-0.6) |
| Lithuania  | 406.98<br>(332.11,<br>495.69)       | 8.50 (7.00,<br>10.21)   | -0.8 (-1.4, -<br>0.1) | 92.36 (63.59,<br>124.08)            | 5.13 (4.24,<br>6.13) | -1.2 (-2.0, -<br>0.4) | 6,293.76<br>(5,154.53,<br>7,572.66)        | 157.12 (130.46,<br>187.50) | -2.0 (-2.8,<br>-1.2) |
| Luxembourg | 115.35<br>(95.11,<br>138.86)        | 13.99 (11.53,<br>16.86) | 0.0 (-0.3,<br>0.3)    | 3,451.10<br>(2,930.51,<br>4,041.66) | 5.46 (4.78,<br>6.25) | -1.3 (-1.5, -<br>1.1) | 1,189.36<br>(1,040.87,<br>1,360.40)        | 148.27 (129.07,<br>171.25) | -1.8 (-2.0,<br>-1.6) |
| Madagascar | 816.85<br>(553.60,<br>1,154.97)     | 3.55 (2.56,<br>4.77)    | -1.1 (-1.3, -<br>0.9) | 106.63<br>(78.70,<br>141.24)        | 2.63 (1.95,<br>3.48) | -0.6 (-0.7, -<br>0.5) | 27,443.17<br>(18,745.62<br>,<br>39,068.20) | 105.45 (75.60,<br>141.53)  | -1.3 (-1.5,<br>-1.1) |
| Malawi     | 528.07<br>(340.06,<br>832.60)       | 3.49 (2.46,<br>5.03)    | -1.0 (-1.3, -<br>0.7) | 20.74 (12.14,<br>32.41)             | 2.55 (1.86,<br>3.46) | -0.6 (-0.8, -<br>0.4) | 17,748.58<br>(11,185.26<br>,<br>28,351.91) | 102.30 (68.87,<br>153.47)  | -1.2 (-1.6,<br>-0.8) |
| Malaysia   | 2,002.97<br>(1,568.44,<br>2,612.67) | 7.05 (5.52,<br>9.18)    | -0.4 (-0.5, -<br>0.3) | 946.78<br>(787.53,<br>1,132.30)     | 5.10 (4.01,<br>6.64) | -0.4 (-0.6, -<br>0.2) | 54,662.12<br>(42,791.40<br>,<br>69,727.80) | 180.99 (141.59,<br>232.52) | -0.9 (-1.2,<br>-0.6) |
| Maldives   | 20.43 (16.50,<br>25.05)             | 5.51 (4.52,<br>6.61)    | -1.7 (-2.0, -<br>1.4) | 438.23<br>(313.42,<br>622.46)       | 3.51 (2.86,<br>4.17) | -2.1 (-2.2, -<br>1.9) | 491.41<br>(396.86,<br>633.51)              | 118.38 (97.05,<br>146.06)  | -2.6 (-2.8,<br>-2.3) |

|                                        |                                     |                         |                       |                                     |                      |                       |                                                       |                            |                      |
|----------------------------------------|-------------------------------------|-------------------------|-----------------------|-------------------------------------|----------------------|-----------------------|-------------------------------------------------------|----------------------------|----------------------|
| Mali                                   | 569.44<br>(404.31,<br>812.27)       | 3.26 (2.44,<br>4.35)    | -0.2 (-0.5,<br>0.2)   | 213.70<br>(141.00,<br>314.52)       | 2.62 (1.99,<br>3.43) | -0.2 (-0.5,<br>0.1)   | 21,066.79<br>(14,533.29<br>,<br>31,164.35)            | 99.78 (72.45,<br>136.89)   | -0.4 (-0.8,<br>0.0)  |
| Malta                                  | 81.54 (67.63,<br>97.18)             | 12.29 (10.26,<br>14.65) | 1.4 (1.2, 1.7)        | 20.02 (17.17,<br>22.80)             | 3.86 (3.34,<br>4.38) | -1.1 (-1.2, -<br>1.0) | 726.22<br>(634.96,<br>822.63)                         | 116.95 (102.36,<br>131.47) | -0.9 (-1.0,<br>-0.8) |
| Marshall<br>Islands                    | 3.38 (2.30,<br>4.82)                | 7.31 (5.08,<br>10.33)   | -0.2 (-0.2, -<br>0.1) | 7,697.52<br>(6,499.14,<br>8,584.48) | 5.77 (4.09,<br>8.12) | -0.4 (-0.6, -<br>0.2) | 109.27<br>(74.81,<br>156.80)                          | 210.32 (144.75,<br>299.86) | -0.3 (-0.3,<br>-0.2) |
| Mauritania                             | 104.45<br>(67.12,<br>154.09)        | 3.53 (2.41,<br>4.88)    | -0.5 (-0.8, -<br>0.3) | 7.31 (5.35,<br>9.51)                | 2.89 (2.05,<br>3.82) | -0.7 (-0.9, -<br>0.5) | 3,342.98<br>(2,069.43,<br>4,971.92)                   | 96.98 (63.45,<br>138.51)   | -0.9 (-1.2,<br>-0.7) |
| Mauritius                              | 75.34 (61.02,<br>91.26)             | 5.84 (4.73,<br>7.09)    | -0.5 (-0.9, -<br>0.1) | 345.67<br>(250.51,<br>463.42)       | 3.39 (2.79,<br>4.07) | -0.2 (-0.6,<br>0.1)   | 1,827.76<br>(1,493.63,<br>2,217.66)                   | 141.89 (116.02,<br>171.18) | -0.4 (-0.7,<br>-0.1) |
| Mexico                                 | 7,787.37<br>(6,810.46,<br>8,824.89) | 6.44 (5.63,<br>7.28)    | -0.2 (-0.4,<br>0.1)   | 28.38 (19.45,<br>38.69)             | 4.37 (3.84,<br>4.95) | -0.1 (-0.2,<br>0.0)   | 238,811.9<br>5<br>(210,172.6<br>4,<br>268,748.3<br>1) | 194.13 (170.74,<br>217.88) | -0.3 (-0.6,<br>0.0)  |
| Micronesia<br>(Federated<br>States of) | 6.24 (3.31,<br>9.02)                | 7.27 (4.23,<br>10.41)   | -0.5 (-0.5, -<br>0.4) | 5,857.10<br>(5,316.65,<br>6,138.89) | 5.78 (3.65,<br>8.28) | -0.5 (-0.6, -<br>0.5) | 193.72<br>(99.37,<br>284.17)                          | 204.27 (109.23,<br>298.40) | -0.7 (-0.7,<br>-0.6) |

|            |                               |                      |                   |                               |                    |                   |                                    |                         |                   |
|------------|-------------------------------|----------------------|-------------------|-------------------------------|--------------------|-------------------|------------------------------------|-------------------------|-------------------|
| Monaco     | 17.67 (13.13, 22.36)          | 27.38 (19.66, 36.33) | 0.7 (0.5, 0.8)    | 44.92 (34.58, 58.32)          | 9.66 (7.42, 11.85) | 0.2 (0.1, 0.2)    | 171.55 (132.42, 211.42)            | 273.49 (215.35, 341.21) | -0.3 (-0.4, -0.3) |
| Mongolia   | 111.20 (83.08, 148.77)        | 3.79 (2.86, 4.96)    | -0.1 (-0.4, 0.1)  | 1,876.10 (1,453.28, 2,350.53) | 2.88 (2.20, 3.74)  | -0.2 (-0.4, 0.1)  | 3,635.76 (2,686.49, 4,938.27)      | 114.00 (85.40, 151.89)  | -0.5 (-0.8, -0.3) |
| Montenegro | 86.92 (70.83, 105.62)         | 10.03 (8.16, 12.21)  | 1.3 (0.9, 1.6)    | 576.77 (513.17, 641.06)       | 4.58 (3.77, 5.52)  | 0.0 (-0.4, 0.4)   | 1,134.40 (924.38, 1,372.42)        | 144.73 (115.67, 177.20) | -0.6 (-1.0, -0.2) |
| Morocco    | 992.35 (752.74, 1,265.34)     | 3.06 (2.37, 3.86)    | -0.1 (-0.3, 0.1)  | 194.00 (151.65, 247.74)       | 2.47 (1.91, 3.10)  | 0.0 (-0.3, 0.3)   | 26,472.12 (19,583.69, 34,258.74)   | 77.29 (57.99, 98.82)    | -0.5 (-0.7, -0.2) |
| Mozambique | 1,953.50 (1,093.74, 3,576.30) | 6.33 (4.29, 9.68)    | -0.1 (-0.4, 0.3)  | 4,404.62 (3,489.54, 5,641.97) | 4.32 (3.22, 5.69)  | 0.1 (-0.1, 0.3)   | 61,585.48 (34,067.76, 111,060.74)  | 180.87 (118.93, 283.85) | -0.3 (-0.7, 0.1)  |
| Myanmar    | 4,219.39 (2,929.94, 5,833.45) | 8.37 (5.93, 11.44)   | -1.4 (-1.5, -1.3) | 397.90 (287.45, 546.31)       | 5.53 (4.19, 7.15)  | -1.3 (-1.4, -1.3) | 118,829.91 (82,099.35, 164,511.81) | 225.56 (157.10, 311.15) | -1.8 (-1.9, -1.7) |



|             |                               |                      |                   |                               |                   |                   |                                  |                         |                   |
|-------------|-------------------------------|----------------------|-------------------|-------------------------------|-------------------|-------------------|----------------------------------|-------------------------|-------------------|
| Namibia     | 59.84 (41.99, 79.80)          | 3.33 (2.45, 4.35)    | 0.6 (0.3, 0.9)    | 32.56 (27.94, 37.30)          | 2.53 (1.95, 3.23) | 0.3 (0.0, 0.6)    | 1,620.44 (1,109.40, 2,170.78)    | 80.88 (57.28, 107.56)   | 0.2 (-0.1, 0.4)   |
| Nauru       | 0.76 (0.50, 1.11)             | 9.07 (6.39, 12.74)   | -0.4 (-0.5, -0.3) | 2.64 (2.03, 3.37)             | 6.46 (4.62, 8.80) | -0.5 (-0.6, -0.4) | 22.84 (15.15, 33.38)             | 242.73 (166.99, 346.34) | -0.6 (-0.7, -0.5) |
| Nepal       | 891.35 (681.67, 1,119.57)     | 3.59 (2.78, 4.49)    | -0.9 (-1.0, -0.8) | 671.27 (513.12, 847.43)       | 3.08 (2.36, 3.88) | -0.6 (-0.7, -0.5) | 26,878.14 (20,742.25, 34,105.52) | 98.37 (76.25, 124.12)   | -1.6 (-1.8, -1.4) |
| Netherlands | 3,966.56 (3,109.72, 5,002.07) | 15.30 (11.93, 19.31) | 0.7 (-0.4, 1.8)   | 1,312.36 (979.60, 1,725.29)   | 5.43 (4.87, 5.90) | 0.1 (-0.4, 0.5)   | 36,162.89 (32,935.48, 39,252.83) | 134.00 (123.11, 144.95) | -0.8 (-1.2, -0.4) |
| New Zealand | 834.48 (694.96, 986.05)       | 12.46 (10.50, 14.66) | 0.4 (0.1, 0.7)    | 40.97 (33.59, 49.20)          | 5.05 (4.63, 5.40) | -0.7 (-0.8, -0.6) | 8,439.80 (7,867.49, 8,957.80)    | 137.31 (129.60, 144.69) | -1.1 (-1.2, -0.9) |
| Nicaragua   | 342.47 (261.33, 428.21)       | 6.06 (4.76, 7.44)    | 0.1 (-0.4, 0.6)   | 57.17 (43.68, 73.70)          | 4.41 (3.53, 5.33) | 0.3 (-0.2, 0.8)   | 10,862.17 (7,819.21, 13,893.57)  | 174.41 (129.13, 220.56) | -0.5 (-0.8, -0.2) |
| Niger       | 941.14 (534.26, 1,571.07)     | 4.43 (3.00, 6.33)    | -0.1 (-0.3, 0.2)  | 1,847.09 (1,377.08, 2,430.70) | 3.32 (2.31, 4.50) | 0.0 (-0.3, 0.3)   | 31,494.19 (18,644.79, 53,766.76) | 129.05 (85.74, 188.43)  | -0.3 (-0.7, 0.0)  |

|                                |                                       |                       |                       |                                   |                      |                       |                                                       |                            |                      |
|--------------------------------|---------------------------------------|-----------------------|-----------------------|-----------------------------------|----------------------|-----------------------|-------------------------------------------------------|----------------------------|----------------------|
| Nigeria                        | 5,199.82<br>(3,704.43,<br>6,947.04)   | 3.46 (2.70,<br>4.39)  | 0.0 (-0.1,<br>0.1)    | 100.51<br>(71.56,<br>121.83)      | 2.87 (2.24,<br>3.58) | -0.1 (-0.2,<br>0.1)   | 177,759.9<br>8<br>(123,076.5<br>8,<br>250,446.3<br>6) | 96.97 (72.25,<br>128.36)   | -0.3 (-0.5,<br>-0.1) |
| Niue                           | 0.12 (0.09,<br>0.16)                  | 6.58 (4.64,<br>8.66)  | -0.3 (-0.3, -<br>0.2) | 30.09 (19.22,<br>49.17)           | 4.40 (3.17,<br>5.80) | -0.7 (-0.7, -<br>0.6) | 2.86 (2.00,<br>3.83)                                  | 162.66 (111.96,<br>221.55) | -0.7 (-0.7,<br>-0.6) |
| North<br>Macedonia             | 240.48<br>(180.92,<br>307.26)         | 8.61 (6.43,<br>10.96) | 0.8 (0.6, 0.9)        | 638.67<br>(380.53,<br>994.02)     | 4.57 (3.55,<br>5.73) | -0.1 (-0.2,<br>0.0)   | 3,994.31<br>(2,924.59,<br>5,109.44)                   | 154.10 (111.29,<br>197.31) | -0.5 (-0.8,<br>-0.2) |
| Northern<br>Mariana<br>Islands | 2.82 (2.28,<br>3.52)                  | 6.29 (5.09,<br>7.86)  | -1.2 (-1.5, -<br>0.9) | 930.61<br>(841.87,<br>994.14)     | 4.39 (3.65,<br>5.38) | -1.7 (-1.8, -<br>1.5) | 67.51<br>(54.24,<br>86.21)                            | 146.35 (118.60,<br>187.16) | -1.7 (-1.8,<br>-1.6) |
| Norway                         | 691.07<br>(588.58,<br>808.46)         | 8.73 (7.45,<br>10.13) | 0.2 (0.0, 0.4)        | 337.70<br>(265.98,<br>441.68)     | 3.07 (2.84,<br>3.25) | -0.8 (-0.9, -<br>0.7) | 6,289.78<br>(5,901.18,<br>6,679.06)                   | 84.02 (79.07,<br>89.30)    | -1.5 (-1.8,<br>-1.3) |
| Oman                           | 165.51<br>(123.64,<br>209.10)         | 6.49 (5.18,<br>7.70)  | 0.0 (-0.2,<br>0.2)    | 1,155.44<br>(890.79,<br>1,492.83) | 4.45 (3.65,<br>5.19) | -0.6 (-0.8, -<br>0.4) | 4,026.37<br>(2,989.86,<br>5,036.66)                   | 128.85 (101.38,<br>153.55) | -1.0 (-1.2,<br>-0.8) |
| Pakistan                       | 10,833.15<br>(8,450.83,<br>13,875.10) | 5.48 (4.49,<br>6.77)  | 0.3 (0.1, 0.5)        | 144.42<br>(118.49,<br>177.02)     | 3.94 (3.28,<br>4.72) | 0.2 (0.0, 0.3)        | 363,564.5<br>5<br>(290,877.4<br>8,                    | 164.17 (134.44,<br>198.89) | 0.2 (0.0,<br>0.3)    |

|                  |                               |                    |                   |                               |                   |                   |                                  |                         |                   |
|------------------|-------------------------------|--------------------|-------------------|-------------------------------|-------------------|-------------------|----------------------------------|-------------------------|-------------------|
|                  |                               |                    |                   |                               |                   |                   | 449,773.54)                      |                         |                   |
| Palau            | 0.58 (0.43, 0.75)             | 2.97 (2.28, 3.72)  | -0.2 (-0.3, -0.1) | 177.69 (145.49, 213.59)       | 2.28 (1.72, 2.85) | -0.4 (-0.5, -0.4) | 14.64 (11.05, 18.61)             | 73.42 (56.55, 91.37)    | -0.5 (-0.6, -0.4) |
| Palestine        | 317.97 (265.61, 391.25)       | 9.52 (8.05, 11.28) | -1.0 (-1.3, -0.7) | 773.89 (580.40, 1,053.05)     | 7.27 (6.07, 8.56) | -0.9 (-1.1, -0.7) | 7,499.91 (6,317.55, 9,165.70)    | 203.13 (170.77, 240.13) | -1.2 (-1.4, -1.1) |
| Panama           | 271.47 (208.40, 342.21)       | 6.53 (5.02, 8.22)  | 0.3 (0.1, 0.5)    | 467.03 (334.30, 628.98)       | 4.46 (3.47, 5.59) | -0.2 (-0.4, 0.0)  | 7,541.84 (5,802.09, 9,526.08)    | 181.64 (139.65, 229.35) | -0.3 (-0.6, -0.1) |
| Papua New Guinea | 591.96 (356.87, 954.73)       | 6.59 (4.30, 9.92)  | 0.0 (-0.4, 0.3)   | 2,120.31 (1,410.19, 3,185.10) | 4.50 (3.15, 6.45) | -0.1 (-0.4, 0.2)  | 17,953.50 (11,669.59, 28,126.08) | 185.10 (125.31, 275.56) | -0.3 (-0.6, 0.1)  |
| Paraguay         | 377.48 (284.84, 493.78)       | 6.07 (4.58, 7.85)  | -0.1 (-0.4, 0.2)  | 776.53 (605.64, 970.46)       | 4.52 (3.43, 5.84) | 0.2 (-0.2, 0.6)   | 10,704.94 (8,104.96, 13,923.19)  | 161.69 (122.22, 210.70) | -0.4 (-0.8, 0.0)  |
| Peru             | 2,184.62 (1,452.56, 3,034.11) | 6.60 (4.38, 9.16)  | -0.3 (-0.8, 0.2)  | 7,152.94 (6,289.66, 7,633.14) | 4.40 (3.03, 6.00) | -0.4 (-1.0, 0.3)  | 60,574.52 (39,891.44, 84,888.77) | 180.89 (119.20, 253.41) | -0.8 (-1.3, -0.2) |
| Philippines      | 6,953.86 (5,837.66, 8,424.87) | 6.79 (5.71, 8.20)  | -1.0 (-1.2, -0.9) | 253.28 (196.58, 315.92)       | 4.55 (3.81, 5.42) | -1.2 (-1.3, -1.0) | 208,842.81 (175,728.3            | 191.18 (161.76, 223.59) | -1.1 (-1.3, -0.8) |

|                        |                                     |                         |                       |                                   |                       |                       |                                            |                            |                      |
|------------------------|-------------------------------------|-------------------------|-----------------------|-----------------------------------|-----------------------|-----------------------|--------------------------------------------|----------------------------|----------------------|
|                        |                                     |                         |                       |                                   |                       |                       | 0,<br>244,235.1<br>4)                      |                            |                      |
| Poland                 | 6,333.37<br>(5,327.83,<br>7,510.62) | 10.30 (8.75,<br>12.17)  | 0.9 (0.7, 1.1)        | 0.05 (0.04,<br>0.07)              | 5.21 (4.43,<br>6.07)  | -0.6 (-0.7, -<br>0.5) | 81,048.19<br>(69,162.24<br>,<br>94,508.74) | 145.41 (124.73,<br>167.90) | -1.5 (-1.7,<br>-1.3) |
| Portugal               | 2,404.62<br>(1,865.02,<br>3,016.09) | 13.54 (10.34,<br>17.03) | 1.2 (0.7, 1.6)        | 6.04 (4.92,<br>7.39)              | 4.65 (4.19,<br>5.03)  | -0.9 (-1.3, -<br>0.6) | 22,028.06<br>(19,861.69<br>,<br>23,912.90) | 133.39 (121.96,<br>145.39) | -1.8 (-2.3,<br>-1.3) |
| Puerto Rico            | 374.00<br>(296.56,<br>468.67)       | 6.76 (5.37,<br>8.56)    | -0.1 (-0.2,<br>0.0)   | 1,010.90<br>(777.25,<br>1,244.49) | 4.06 (3.22,<br>5.08)  | -1.1 (-1.2, -<br>1.0) | 5,964.93<br>(4,705.20,<br>7,505.17)        | 124.19 (97.87,<br>156.45)  | -1.5 (-1.6,<br>-1.4) |
| Qatar                  | 127.06<br>(87.86,<br>179.53)        | 13.28 (9.49,<br>18.27)  | 1.2 (0.0, 2.4)        | 53.30 (46.38,<br>60.94)           | 8.54 (5.58,<br>12.24) | 0.3 (0.1, 0.6)        | 2,532.18<br>(1,714.82,<br>3,793.10)        | 172.50 (126.62,<br>229.30) | -0.9 (-1.7,<br>-0.2) |
| Republic of<br>Korea   | 5,983.49<br>(4,174.11,<br>7,467.31) | 9.19 (6.70,<br>11.45)   | 0.6 (0.3, 0.9)        | 152.19<br>(134.16,<br>173.17)     | 2.69 (2.00,<br>3.15)  | -1.8 (-2.0, -<br>1.7) | 60,045.45<br>(44,776.48<br>,<br>71,351.70) | 96.63 (72.15,<br>116.25)   | -2.7 (-2.9,<br>-2.5) |
| Republic of<br>Moldova | 208.89<br>(183.83,<br>234.75)       | 5.01 (4.39,<br>5.66)    | -2.6 (-3.3, -<br>1.8) | 19.58 (13.58,<br>27.87)           | 2.90 (2.58,<br>3.25)  | -2.6 (-3.5, -<br>1.7) | 4,619.53<br>(4,094.41,<br>5,203.01)        | 118.39 (104.99,<br>132.69) | -3.1 (-3.4,<br>-2.9) |

|                                        |                                        |                      |                       |                                     |                      |                       |                                                       |                            |                      |
|----------------------------------------|----------------------------------------|----------------------|-----------------------|-------------------------------------|----------------------|-----------------------|-------------------------------------------------------|----------------------------|----------------------|
| Romania                                | 2,134.38<br>(1,753.28,<br>2,580.27)    | 7.36 (6.09,<br>8.78) | 0.7 (0.7, 0.8)        | 3,494.93<br>(2,543.72,<br>4,647.07) | 4.16 (3.43,<br>4.97) | 0.1 (-0.4, 0.6)       | 35,614.79<br>(29,170.12<br>,<br>42,804.41)            | 142.37 (118.98,<br>169.26) | -1.0 (-1.1,<br>-1.0) |
| Russian<br>Federation                  | 14,266.01<br>(12,501.69,<br>16,317.41) | 7.09 (6.29,<br>8.06) | 0.7 (-0.4,<br>1.7)    | 438.90<br>(335.95,<br>563.43)       | 3.55 (3.11,<br>4.03) | -0.8 (-1.5,<br>0.0)   | 218,493.3<br>1<br>(191,831.4<br>6,<br>249,166.8<br>0) | 122.63 (107.65,<br>138.69) | -1.3 (-2.1,<br>-0.5) |
| Rwanda                                 | 519.94<br>(330.87,<br>810.96)          | 4.67 (3.23,<br>6.72) | -0.4 (-0.9,<br>0.0)   | 929.05<br>(590.40,<br>1,510.34)     | 3.25 (2.42,<br>4.34) | -0.5 (-0.9, -<br>0.2) | 16,458.62<br>(10,474.21<br>,<br>26,008.04)            | 133.26 (90.55,<br>199.49)  | -0.9 (-1.3,<br>-0.4) |
| Saint Kitts and<br>Nevis               | 3.73 (2.81,<br>4.64)                   | 6.22 (4.70,<br>7.72) | -1.1 (-1.6, -<br>0.5) | 566.69<br>(384.08,<br>791.00)       | 4.06 (3.22,<br>4.92) | -1.2 (-1.4, -<br>0.9) | 83.26<br>(59.47,<br>107.26)                           | 136.94 (99.49,<br>175.74)  | -1.6 (-2.0,<br>-1.1) |
| Saint Lucia                            | 11.08 (9.27,<br>13.06)                 | 5.89 (4.89,<br>6.96) | -0.4 (-0.6, -<br>0.2) | 717.57<br>(549.61,<br>898.72)       | 4.15 (3.48,<br>4.85) | -0.7 (-1.0, -<br>0.5) | 279.26<br>(232.37,<br>329.07)                         | 153.87 (127.26,<br>182.31) | -0.7 (-0.9,<br>-0.5) |
| Saint Vincent<br>and the<br>Grenadines | 7.87 (6.77,<br>9.13)                   | 6.50 (5.58,<br>7.58) | -0.4 (-0.6, -<br>0.2) | 3,325.40<br>(2,976.70,<br>3,635.37) | 4.72 (4.11,<br>5.43) | -0.3 (-0.4, -<br>0.2) | 204.51<br>(174.69,<br>238.62)                         | 173.08 (147.10,<br>203.75) | -0.5 (-0.8,<br>-0.3) |
| Samoa                                  | 10.32 (7.24,<br>13.79)                 | 5.92 (4.26,<br>7.75) | -0.5 (-0.6, -<br>0.4) | 5.15 (4.16,<br>6.32)                | 4.63 (3.42,<br>5.97) | -0.5 (-0.5, -<br>0.5) | 282.93<br>(194.72,<br>383.38)                         | 152.23 (106.93,<br>203.33) | -0.6 (-0.7,<br>-0.6) |

|                       |                               |                      |                  |                               |                    |                   |                                  |                         |                   |
|-----------------------|-------------------------------|----------------------|------------------|-------------------------------|--------------------|-------------------|----------------------------------|-------------------------|-------------------|
| San Marino            | 15.94 (12.09, 21.33)          | 35.14 (26.37, 47.19) | 1.6 (1.5, 1.7)   | 1,647.37 (1,140.13, 2,421.00) | 8.22 (5.48, 11.55) | -0.2 (-0.3, -0.1) | 109.39 (73.41, 155.43)           | 230.29 (156.84, 327.24) | -0.3 (-0.4, -0.3) |
| Sao Tome and Principe | 5.43 (3.77, 7.68)             | 3.58 (2.58, 4.80)    | 0.2 (0.0, 0.3)   | 1,452.61 (997.53, 1,984.69)   | 2.82 (2.08, 3.67)  | 0.2 (0.0, 0.5)    | 174.63 (121.82, 248.10)          | 100.53 (71.87, 136.25)  | -0.3 (-0.5, -0.1) |
| Saudi Arabia          | 1,378.55 (1,018.38, 1,896.26) | 5.36 (4.11, 7.08)    | 0.7 (0.6, 0.8)   | 616.28 (451.39, 787.17)       | 3.43 (2.67, 4.59)  | -0.8 (-0.8, -0.7) | 33,448.69 (24,936.13, 45,749.00) | 107.27 (82.58, 141.54)  | -0.9 (-1.0, -0.8) |
| Senegal               | 509.49 (348.67, 684.32)       | 4.37 (3.13, 5.69)    | 0.1 (-0.7, 0.9)  | 388.79 (268.67, 539.21)       | 3.54 (2.58, 4.55)  | 0.1 (-0.5, 0.7)   | 17,246.43 (11,526.97, 23,857.04) | 127.35 (88.50, 171.31)  | -0.2 (-1.2, 0.9)  |
| Serbia                | 1,067.56 (812.94, 1,356.98)   | 7.92 (5.95, 9.91)    | -0.1 (-0.7, 0.5) | 1,685.29 (1,126.95, 2,346.12) | 4.93 (3.81, 6.16)  | -0.3 (-0.6, 0.0)  | 17,917.78 (13,637.46, 22,748.40) | 142.07 (106.73, 177.95) | -1.2 (-1.8, -0.7) |
| Seychelles            | 9.91 (8.54, 11.69)            | 9.34 (8.06, 10.95)   | 0.2 (-0.3, 0.7)  | 1,498.04 (1,063.85, 1,983.64) | 6.36 (5.48, 7.36)  | -0.3 (-0.7, 0.1)  | 229.99 (197.44, 271.18)          | 219.06 (186.64, 260.91) | -0.4 (-1.2, 0.3)  |
| Sierra Leone          | 358.94 (221.45, 571.96)       | 4.89 (3.29, 7.11)    | 0.4 (0.2, 0.7)   | 597.80 (394.95, 867.48)       | 3.60 (2.55, 4.96)  | 0.3 (0.2, 0.5)    | 12,539.17 (7,608.19, 20,063.14)  | 149.82 (98.35, 220.85)  | 0.2 (0.0, 0.5)    |

|                    |                                     |                        |                       |                               |                       |                       |                                            |                            |                      |
|--------------------|-------------------------------------|------------------------|-----------------------|-------------------------------|-----------------------|-----------------------|--------------------------------------------|----------------------------|----------------------|
| Singapore          | 548.78<br>(425.14,<br>685.85)       | 8.70 (6.82,<br>10.90)  | 0.9 (0.6, 1.3)        | 0.53 (0.42,<br>0.65)          | 2.75 (2.49,<br>3.01)  | -1.7 (-2.2, -<br>1.2) | 5,662.89<br>(5,162.44,<br>6,197.89)        | 93.82 (85.02,<br>103.70)   | -2.3 (-2.7,<br>-1.9) |
| Slovakia           | 751.22<br>(566.78,<br>978.09)       | 9.49 (7.23,<br>12.29)  | 0.8 (0.5, 1.1)        | 724.16<br>(562.52,<br>905.50) | 4.46 (3.29,<br>5.68)  | -0.8 (-1.1, -<br>0.5) | 9,759.40<br>(7,268.41,<br>12,554.28)       | 135.10 (101.55,<br>173.11) | -1.1 (-1.3,<br>-0.8) |
| Slovenia           | 466.16<br>(356.01,<br>629.82)       | 12.92 (9.96,<br>17.54) | 1.5 (1.4, 1.6)        | 96.44 (80.79,<br>115.89)      | 4.58 (3.59,<br>5.85)  | -0.7 (-0.7, -<br>0.6) | 4,052.09<br>(3,165.38,<br>5,204.01)        | 121.97 (96.76,<br>154.07)  | -1.1 (-1.3,<br>-0.9) |
| Solomon<br>Islands | 47.43 (30.32,<br>77.46)             | 9.03 (6.07,<br>14.31)  | 0.0 (-0.2,<br>0.2)    | 4.49 (4.01,<br>4.97)          | 6.83 (4.66,<br>10.68) | -0.1 (-0.3,<br>0.0)   | 1,542.70<br>(964.60,<br>2,564.56)          | 266.25 (170.17,<br>435.50) | -0.1 (-0.3,<br>0.1)  |
| Somalia            | 1,005.79<br>(573.61,<br>1,573.70)   | 4.82 (2.92,<br>7.05)   | -0.2 (-0.4, -<br>0.1) | 315.02<br>(213.49,<br>471.32) | 3.49 (2.24,<br>4.90)  | 0.0 (-0.1, 0.1)       | 34,492.54<br>(21,238.00<br>,<br>51,367.68) | 149.58 (96.56,<br>212.99)  | -0.3 (-0.4,<br>-0.1) |
| South Africa       | 2,092.00<br>(1,780.09,<br>2,373.49) | 4.37 (3.66,<br>4.94)   | -0.3 (-0.5, -<br>0.1) | 49.88 (40.76,<br>60.25)       | 3.34 (2.66,<br>3.76)  | -0.2 (-0.6,<br>0.1)   | 51,063.94<br>(43,169.27<br>,<br>59,229.35) | 99.42 (83.20,<br>113.33)   | -1.0 (-1.5,<br>-0.5) |
| South Sudan        | 514.59<br>(345.42,<br>729.92)       | 5.05 (3.64,<br>6.85)   | -0.7 (-0.9, -<br>0.5) | 657.44<br>(535.58,<br>802.16) | 3.34 (2.38,<br>4.56)  | -0.4 (-0.5, -<br>0.2) | 16,573.48<br>(11,179.44<br>,<br>23,098.80) | 148.89 (104.37,<br>203.18) | -0.8 (-1.0,<br>-0.6) |

|             |                                       |                         |                       |                                     |                      |                       |                                                 |                            |                      |
|-------------|---------------------------------------|-------------------------|-----------------------|-------------------------------------|----------------------|-----------------------|-------------------------------------------------|----------------------------|----------------------|
| Spain       | 10,957.62<br>(8,615.90,<br>13,779.35) | 16.10 (12.74,<br>20.33) | 1.1 (1.0, 1.2)        | 5,249.30<br>(4,602.84,<br>5,958.00) | 4.42 (4.01,<br>4.78) | -0.8 (-0.9, -<br>0.7) | 85,450.64<br>(77,930.84<br>,<br>92,576.13)      | 127.21 (117.29,<br>137.62) | -1.6 (-1.7,<br>-1.5) |
| Sri Lanka   | 1,303.42<br>(931.67,<br>1,725.32)     | 5.75 (4.08,<br>7.65)    | -0.6 (-1.0, -<br>0.2) | 616.34<br>(462.53,<br>795.72)       | 3.84 (2.79,<br>4.99) | -0.9 (-1.1, -<br>0.6) | 31,619.02<br>(22,328.72<br>,<br>42,012.52)      | 140.24 (99.67,<br>185.72)  | -1.4 (-2.0,<br>-0.7) |
| Sudan       | 2,837.20<br>(1,891.69,<br>4,044.63)   | 8.76 (5.90,<br>12.03)   | -0.6 (-0.7, -<br>0.5) | 7,426.66<br>(6,453.86,<br>8,467.60) | 6.44 (4.40,<br>8.69) | -0.3 (-0.4, -<br>0.2) | 85,335.60<br>(55,673.50<br>,<br>122,200.5<br>9) | 234.93 (155.79,<br>329.68) | -0.8 (-0.9,<br>-0.7) |
| Suriname    | 29.61 (23.57,<br>36.40)               | 5.15 (4.11,<br>6.30)    | 0.0 (-0.8,<br>0.7)    | 74.89 (51.02,<br>104.66)            | 3.65 (2.95,<br>4.43) | 0.0 (-0.5, 0.5)       | 827.30<br>(660.28,<br>1,012.42)                 | 143.50 (114.88,<br>175.81) | -0.2 (-1.2,<br>0.8)  |
| Sweden      | 2,257.11<br>(1,921.20,<br>2,622.84)   | 13.62 (11.65,<br>15.74) | 0.3 (0.1, 0.5)        | 49.92 (34.03,<br>63.35)             | 4.32 (3.98,<br>4.58) | -0.5 (-0.6, -<br>0.4) | 17,821.81<br>(16,608.46<br>,<br>18,873.06)      | 111.92 (105.30,<br>118.13) | -1.2 (-1.3,<br>-1.1) |
| Switzerland | 1,778.78<br>(1,391.82,<br>2,246.88)   | 13.30 (10.42,<br>17.08) | -1.0 (-1.3, -<br>0.7) | 3,391.35<br>(2,575.12,<br>4,278.55) | 3.69 (3.34,<br>4.01) | -2.0 (-2.3, -<br>1.8) | 13,148.78<br>(12,000.84<br>,<br>14,401.99)      | 100.94 (92.72,<br>110.84)  | -2.8 (-3.1,<br>-2.6) |



|                                  |                                     |                         |                       |                                     |                            |                       |                                                      |                            |                      |
|----------------------------------|-------------------------------------|-------------------------|-----------------------|-------------------------------------|----------------------------|-----------------------|------------------------------------------------------|----------------------------|----------------------|
| Syrian Arab Republic             | 2,664.86<br>(2,013.59,<br>3,501.08) | 20.88 (15.92,<br>27.37) | -0.9 (-1.3, -<br>0.4) | 0.41 (0.28,<br>0.60)                | 15.82<br>(11.96,<br>20.42) | -1.1 (-1.2, -<br>1.0) | 62,403.61<br>(47,499.23<br>,<br>83,969.14)           | 456.25 (348.86,<br>606.34) | -1.5 (-1.7,<br>-1.2) |
| Taiwan<br>(Province of<br>China) | 2,674.68<br>(2,055.97,<br>3,447.15) | 9.26 (7.25,<br>11.86)   | 0.5 (0.1, 1.0)        | 4,212.96<br>(3,538.75,<br>4,971.20) | 3.76 (2.99,<br>4.79)       | -0.2 (-0.5,<br>0.2)   | 35,884.83<br>(28,335.39<br>,<br>46,255.57)           | 129.50 (103.23,<br>164.03) | -0.9 (-1.4,<br>-0.4) |
| Tajikistan                       | 421.28<br>(313.07,<br>623.71)       | 5.27 (4.14,<br>7.24)    | -1.6 (-1.9, -<br>1.3) | 45.72 (33.88,<br>61.39)             | 3.82 (3.09,<br>4.91)       | -1.1 (-1.3, -<br>0.9) | 13,822.96<br>(10,228.55<br>,<br>20,367.49)           | 154.51 (118.30,<br>217.70) | -1.9 (-2.3,<br>-1.5) |
| Thailand                         | 6,078.42<br>(3,951.43,<br>8,200.56) | 8.04 (5.46,<br>10.46)   | -0.3 (-0.4, -<br>0.1) | 2,950.35<br>(2,499.05,<br>3,532.42) | 4.69 (2.95,<br>6.35)       | -0.4 (-0.6, -<br>0.3) | 129,916.3<br>1<br>(84,446.93<br>,<br>174,809.8<br>4) | 171.17 (119.67,<br>224.21) | -0.8 (-1.0,<br>-0.7) |
| Timor-Leste                      | 82.64 (50.63,<br>107.15)            | 7.01 (4.67,<br>9.04)    | -1.1 (-1.4, -<br>0.9) | 5.31 (3.56,<br>7.30)                | 5.04 (3.64,<br>6.42)       | -0.6 (-0.9, -<br>0.3) | 2,368.15<br>(1,431.52,<br>3,086.76)                  | 186.29 (117.62,<br>239.52) | -1.2 (-1.7,<br>-0.7) |
| Togo                             | 236.74<br>(174.53,<br>315.23)       | 4.02 (2.98,<br>5.28)    | 0.2 (-0.1,<br>0.4)    | 0.43 (0.32,<br>0.56)                | 3.23 (2.40,<br>4.22)       | 0.2 (-0.1, 0.4)       | 8,056.53<br>(5,765.60,<br>10,730.78)                 | 116.63 (85.14,<br>154.06)  | 0.0 (-0.3,<br>0.3)   |

|                     |                               |                    |                   |                               |                   |                   |                                     |                         |                   |
|---------------------|-------------------------------|--------------------|-------------------|-------------------------------|-------------------|-------------------|-------------------------------------|-------------------------|-------------------|
| Tokelau             | 0.07 (0.05, 0.10)             | 5.34 (3.68, 7.34)  | -0.8 (-1.0, -0.7) | 1,071.96 (950.72, 1,176.03)   | 4.09 (2.88, 5.62) | -0.9 (-0.9, -0.9) | 1.93 (1.32, 2.72)                   | 141.83 (95.97, 201.22)  | -1.1 (-1.2, -1.0) |
| Tonga               | 3.64 (2.74, 4.78)             | 3.97 (3.01, 5.14)  | -0.1 (-0.2, 0.1)  | 297.78 (216.38, 385.96)       | 3.09 (2.39, 3.93) | -0.1 (-0.3, 0.0)  | 102.16 (75.95, 136.31)              | 106.72 (79.93, 140.62)  | -0.1 (-0.3, 0.0)  |
| Trinidad and Tobago | 75.58 (56.69, 97.69)          | 5.02 (3.80, 6.50)  | -0.9 (-1.1, -0.8) | 6,491.61 (5,335.97, 7,817.44) | 3.61 (2.75, 4.65) | -1.2 (-1.4, -1.0) | 2,105.02 (1,584.68, 2,729.65)       | 150.84 (113.33, 194.85) | -1.3 (-1.5, -1.1) |
| Tunisia             | 519.59 (373.90, 703.17)       | 4.38 (3.16, 5.89)  | -0.6 (-0.6, -0.5) | 11.05 (9.63, 12.51)           | 2.93 (2.14, 3.92) | -0.8 (-0.9, -0.6) | 11,244.74 (8,178.67, 15,076.59)     | 95.35 (69.88, 127.03)   | -1.3 (-1.5, -1.2) |
| Turkey              | 6,883.86 (5,515.59, 8,615.53) | 8.45 (6.85, 10.48) | -1.3 (-1.4, -1.1) | 354.55 (249.42, 471.61)       | 5.28 (4.21, 6.68) | -1.7 (-1.9, -1.6) | 143,270.18 (115,248.33, 176,024.88) | 176.71 (143.76, 214.02) | -2.4 (-2.8, -2.1) |
| Turkmenistan        | 238.95 (195.76, 293.11)       | 5.00 (4.12, 6.12)  | -1.4 (-2.3, -0.6) | 887.02 (640.34, 1,163.63)     | 3.22 (2.63, 3.97) | -0.8 (-1.4, -0.2) | 7,375.76 (6,083.25, 9,026.65)       | 147.98 (122.05, 180.79) | -1.6 (-2.0, -1.1) |
| Tuvalu              | 0.68 (0.46, 0.96)             | 6.30 (4.23, 8.86)  | -1.2 (-1.3, -1.1) | 309.84 (217.91, 422.04)       | 4.91 (3.37, 6.87) | -1.0 (-1.1, -0.9) | 20.05 (13.46, 28.50)                | 175.06 (117.54, 248.92) | -1.4 (-1.5, -1.3) |

|                                   |                                        |                         |                       |                                        |                      |                       |                                                       |                            |                      |
|-----------------------------------|----------------------------------------|-------------------------|-----------------------|----------------------------------------|----------------------|-----------------------|-------------------------------------------------------|----------------------------|----------------------|
| Uganda                            | 1,423.46<br>(868.91,<br>2,246.06)      | 3.54 (2.49,<br>5.02)    | -0.1 (-0.5,<br>0.3)   | 145.44<br>(107.28,<br>201.29)          | 2.40 (1.77,<br>3.17) | -0.2 (-0.4,<br>0.0)   | 42,911.49<br>(26,346.00<br>,<br>67,469.48)            | 98.31 (66.58,<br>140.90)   | -0.5 (-0.8,<br>-0.1) |
| Ukraine                           | 4,958.75<br>(4,176.18,<br>5,859.63)    | 8.60 (7.33,<br>10.01)   | -1.2 (-2.3, -<br>0.2) | 60,380.74<br>(50,213.16,<br>70,987.66) | 4.78 (4.07,<br>5.69) | -1.4 (-2.1, -<br>0.7) | 96,833.96<br>(82,600.66<br>,<br>114,737.4<br>7)       | 194.66 (166.43,<br>227.72) | -1.8 (-2.9,<br>-0.8) |
| United Arab<br>Emirates           | 428.81<br>(300.13,<br>592.22)          | 7.69 (5.21,<br>10.13)   | -1.0 (-1.3, -<br>0.8) | 2.33 (1.61,<br>3.35)                   | 6.56 (4.33,<br>8.71) | -1.3 (-1.6, -<br>1.0) | 13,054.39<br>(9,155.37,<br>18,219.56)                 | 177.70 (130.00,<br>229.86) | -1.2 (-1.7,<br>-0.7) |
| United<br>Kingdom                 | 12,648.01<br>(10,622.97,<br>14,965.18) | 12.55 (10.66,<br>14.72) | 0.4 (0.2, 0.6)        | 7.03 (5.77,<br>8.29)                   | 4.67 (4.33,<br>4.87) | -0.6 (-0.7, -<br>0.5) | 118,455.7<br>8<br>(111,853.0<br>8,<br>123,402.7<br>3) | 119.88 (114.88,<br>124.72) | -1.2 (-1.4,<br>-1.1) |
| United<br>Republic of<br>Tanzania | 3,485.67<br>(2,200.02,<br>5,504.43)    | 5.69 (4.06,<br>8.19)    | 0.0 (-0.2,<br>0.3)    | 11.75 (9.66,<br>14.55)                 | 3.65 (2.73,<br>4.85) | 0.1 (0.0, 0.3)        | 106,405.0<br>4<br>(68,829.54<br>,<br>166,185.7<br>3)  | 161.63 (112.08,<br>236.39) | -0.1 (-0.4,<br>0.1)  |

|                                    |                                     |                     |                   |                              |                   |                   |                                        |                         |                   |
|------------------------------------|-------------------------------------|---------------------|-------------------|------------------------------|-------------------|-------------------|----------------------------------------|-------------------------|-------------------|
| United States of America           | 53,106.99<br>(45,609.57, 61,436.59) | 10.21 (8.88, 11.77) | -0.6 (-0.7, -0.4) | 189.32<br>(170.34, 205.84)   | 5.74 (5.36, 6.01) | -0.6 (-0.8, -0.4) | 668,595.44<br>(636,491.88, 696,306.42) | 145.44 (139.75, 150.82) | -1.1 (-1.3, -1.0) |
| United States Virgin Islands       | 9.71 (7.95, 11.57)                  | 6.32 (5.12, 7.68)   | -0.1 (-0.3, 0.0)  | 10.56 (6.99, 15.00)          | 4.37 (3.62, 5.19) | -0.4 (-0.5, -0.3) | 190.16<br>(154.64, 231.23)             | 139.32 (112.21, 172.56) | -0.9 (-1.2, -0.6) |
| Uruguay                            | 373.39<br>(296.15, 461.17)          | 7.99 (6.30, 9.96)   | -0.4 (-0.6, -0.2) | 130.82<br>(101.69, 163.34)   | 5.51 (5.06, 6.00) | -0.7 (-0.9, -0.5) | 7,029.01<br>(6,459.30, 7,571.30)       | 169.89 (156.11, 182.93) | -1.2 (-1.4, -1.0) |
| Uzbekistan                         | 1,846.06<br>(1,563.91, 2,177.23)    | 6.30 (5.40, 7.34)   | -1.2 (-1.4, -1.0) | 132.13<br>(101.52, 166.04)   | 4.24 (3.66, 4.93) | -0.7 (-0.9, -0.4) | 56,710.79<br>(48,230.99, 66,869.92)    | 175.87 (150.42, 206.78) | -1.4 (-1.6, -1.2) |
| Vanuatu                            | 15.57 (10.23, 22.03)                | 6.47 (4.26, 9.15)   | 0.2 (0.0, 0.4)    | 272.51<br>(169.54, 427.65)   | 5.10 (3.40, 7.23) | 0.0 (-0.2, 0.2)   | 494.17<br>(318.00, 714.37)             | 185.97 (121.80, 265.95) | 0.1 (-0.1, 0.3)   |
| Venezuela (Bolivarian Republic of) | 1,632.96<br>(1,245.24, 2,096.99)    | 5.84 (4.46, 7.50)   | -0.4 (-0.8, -0.1) | 800.27<br>(598.38, 1,020.87) | 4.13 (3.21, 5.32) | -0.8 (-1.6, 0.0)  | 47,363.06<br>(36,493.34, 61,151.94)    | 170.84 (131.89, 219.72) | -0.7 (-1.4, 0.0)  |
| Viet Nam                           | 4,524.75<br>(3,430.63, 5,834.20)    | 4.95 (3.81, 6.34)   | 0.1 (0.0, 0.2)    | 39.89 (28.12, 51.22)         | 3.81 (2.95, 4.83) | -0.2 (-0.3, -0.1) | 120,340.11<br>(91,544.50)              | 128.66 (98.87, 163.62)  | -0.5 (-0.5, -0.4) |

|          |                                     |                       |                       |                                     |                      |                       |                                            |                            |                      |
|----------|-------------------------------------|-----------------------|-----------------------|-------------------------------------|----------------------|-----------------------|--------------------------------------------|----------------------------|----------------------|
|          |                                     |                       |                       |                                     |                      |                       | ,<br>153,698.2<br>1)                       |                            |                      |
| Yemen    | 1,891.93<br>(1,242.62,<br>2,739.81) | 8.32 (5.60,<br>11.91) | 0.0 (-0.2,<br>0.1)    | 1.93 (1.58,<br>2.40)                | 6.57 (4.47,<br>9.14) | 0.1 (0.0, 0.2)        | 58,648.79<br>(37,476.25<br>,<br>86,900.70) | 226.14 (148.08,<br>326.31) | -0.2 (-0.4,<br>-0.1) |
| Zambia   | 819.63<br>(539.41,<br>1,292.13)     | 5.08 (3.76,<br>6.88)  | -0.8 (-0.9, -<br>0.7) | 2,186.24<br>(1,704.40,<br>2,744.26) | 3.63 (2.82,<br>4.56) | -0.5 (-0.6, -<br>0.3) | 26,898.14<br>(17,449.08<br>,<br>41,759.06) | 147.43 (106.74,<br>205.82) | -1.0 (-1.2,<br>-0.9) |
| Zimbabwe | 383.21<br>(294.79,<br>494.91)       | 3.58 (2.75,<br>4.78)  | -0.3 (-0.7,<br>0.2)   | 694.10<br>(462.46,<br>972.43)       | 2.88 (2.19,<br>3.89) | -0.2 (-0.5,<br>0.1)   | 12,625.41<br>(9,641.29,<br>16,278.27)      | 100.62 (77.14,<br>131.14)  | -0.2 (-0.6,<br>0.3)  |

Abbreviations: AAPC, average annual percentage change; CI, confidence interval; UI, uncertainty interval.

**Supplementary Table 3.** The AAPCs (95% CI) of ASIR, ASDR and age-standardized DALY rate due to 4 leukemia subtypes from 1990 to 2019.

[illegible]

|                           |                   |                   |                   |                   |                   |                   |                   |                   |                   |                  |                   |                   |
|---------------------------|-------------------|-------------------|-------------------|-------------------|-------------------|-------------------|-------------------|-------------------|-------------------|------------------|-------------------|-------------------|
| Central Asia              | 0.0 (0.0, 0.1)    | -0.1 (-0.2, 0.0)  | -0.4 (-0.5, -0.3) | -1.5 (-1.8, -1.1) | -1.4 (-1.8, -1.1) | -2.1 (-2.5, -1.7) | -0.1 (-0.2, -0.1) | -1.1 (-1.4, -0.9) | -1.4 (-1.6, -1.1) | 1.3 (0.9, 1.6)   | 0.5 (0.4, 0.7)    | 0.0 (-0.2, 0.1)   |
| Central Europe            | 0.8 (0.6, 0.9)    | 0.7 (0.6, 0.8)    | 0.0 (-0.1, 0.1)   | -0.4 (-0.6, -0.2) | -2.8 (-3.0, -2.5) | -3.3 (-3.6, -3)   | 1.9 (1.5, 2.2)    | -1.9 (-2.0, -1.8) | -2.1 (-2.2, -2.0) | 3.3 (3.0, 3.6)   | 1.7 (1.6, 1.9)    | 1.6 (1.4, 1.7)    |
| Eastern Europe            | -1.3 (-1.9, -0.7) | -1.2 (-1.9, -0.6) | -1.9 (-2.5, -1.2) | 0.5 (-0.8, 1.8)   | -0.8 (-1.8, 0.3)  | -1.3 (-2.4, -0.1) | 0.1 (-0.4, 0.7)   | -1.9 (-2.1, -1.6) | -2.4 (-2.6, -2.1) | 1.7 (0.8, 2.7)   | 0.5 (-0.2, 1.3)   | 0.3 (-0.5, 1.2)   |
| Australasia               | 0.0 (-0.2, 0.1)   | 0.0 (-0.1, 0.1)   | -0.4 (-0.7, -0.2) | -0.8 (-1.7, 0.1)  | -4.2 (-4.7, -3.6) | -4.3 (-4.7, -3.9) | 1.0 (0.3, 1.6)    | -2.1 (-2.3, -1.9) | -2.3 (-2.5, -2.1) | 0.5 (0.1, 1.0)   | -0.6 (-1.0, -0.3) | -0.8 (-1.1, -0.4) |
| High-income Asia Pacific  | -0.1 (-0.2, 0.0)  | -0.1 (-0.2, 0.1)  | -0.8 (-1.0, -0.7) | 0.7 (0.4, 0.9)    | -4.4 (-4.7, -4.2) | -4.8 (-5.1, -4.6) | 2.7 (2.1, 3.3)    | -1.8 (-2.0, -1.7) | -1.9 (-2.1, -1.8) | 1.0 (0.8, 1.1)   | -0.8 (-1.1, -0.5) | -0.7 (-0.9, -0.4) |
| High-income North America | 0.6 (0.5, 0.7)    | 0.5 (0.4, 0.6)    | 0.0 (-0.2, 0.2)   | -1.3 (-1.6, -1.0) | -3.8 (-4.1, -3.5) | -4.3 (-4.6, -4.0) | 0.4 (0.3, 0.5)    | -1.1 (-1.2, -0.9) | -1.4 (-1.6, -1.2) | -0.2 (-0.6, 0.1) | -0.8 (-0.9, -0.6) | -1.1 (-1.2, -0.9) |
| Southern Latin America    | 0.5 (0.4, 0.6)    | 0.4 (0.3, 0.5)    | 0.0 (-0.2, 0.1)   | -2.4 (-3.0, -1.9) | -3.0 (-3.4, -2.6) | -3.4 (-3.8, -3.1) | 1.0 (0.7, 1.4)    | -0.5 (-0.6, -0.3) | -0.8 (-1.0, -0.6) | 0.7 (0.3, 1.1)   | -0.4 (-0.7, -0.2) | -0.6 (-0.8, -0.4) |
| Western Europe            | 0.7 (0.5, 0.8)    | 0.7 (0.6, 0.8)    | 0.0 (0.0, 0.1)    | 1.5 (1.1, 2.0)    | -3.8 (-4.1, -3.5) | -4.0 (-4.3, -3.8) | 2.4 (2.1, 2.6)    | -1.6 (-1.7, -1.5) | -1.6 (-1.8, -1.5) | 0.9 (0.6, 1.2)   | -0.4 (-0.6, -0.3) | -0.7 (-0.8, -0.5) |
| Andean Latin America      | 1.6 (1.5, 1.7)    | 1.4 (1.3, 1.5)    | 1.1 (0.9, 1.2)    | -0.1 (-0.6, 0.3)  | -0.1 (-0.5, 0.3)  | -0.5 (-1.0, -0.1) | 0.7 (0.4, 0.9)    | 0.4 (0.1, 0.6)    | 0.1 (-0.1, 0.4)   | 2.7 (2.1, 3.4)   | 1.6 (0.9, 2.2)    | 1.3 (0.6, 1.9)    |
| Caribbean                 | 0.5 (0.3, 0.7)    | 0.3 (0.1, 0.4)    | 0.1 (-0.1, 0.3)   | -0.9 (-1.3, -0.6) | -1.4 (-1.6, -1.2) | -1.6 (-1.7, -1.5) | 0.4 (0.2, 0.6)    | -0.3 (-0.5, 0.0)  | -0.3 (-0.4, -0.1) | 0.8 (0.7, 1.0)   | -0.1 (-0.3, 0.0)  | -0.1 (-0.4, 0.2)  |
| Central Latin America     | 1.1 (0.9, 1.4)    | 1.0 (0.7, 1.3)    | 0.7 (0.4, 0.9)    | -1.2 (-1.4, -1.0) | -1.4 (-1.6, -1.2) | -1.7 (-1.9, -1.5) | 1.3 (1.2, 1.4)    | 0.5 (0.3, 0.8)    | 0.3 (0.1, 0.5)    | 1.4 (1.1, 1.7)   | 0.2 (-0.1, 0.6)   | 0.1 (-0.2, 0.5)   |
| Tropical Latin America    | 0.4 (0.3, 0.4)    | 0.2 (0.2, 0.3)    | -0.2 (-0.3, -0.1) | -2.9 (-3.1, -2.8) | -2.9 (-3.0, -2.7) | -3.6 (-3.7, -3.4) | -0.2 (-0.4, 0.0)  | -0.6 (-0.7, -0.4) | -0.8 (-1.0, -0.6) | 1.3 (1.1, 1.4)   | 0.4 (0.3, 0.6)    | 0.2 (0.0, 0.3)    |

|                              |                 |                   |                   |                   |                   |                   |                   |                   |                   |                  |                   |                   |
|------------------------------|-----------------|-------------------|-------------------|-------------------|-------------------|-------------------|-------------------|-------------------|-------------------|------------------|-------------------|-------------------|
| North Africa and Middle East | 0.0 (-0.1, 0.1) | -0.2 (-0.2, -0.1) | -0.5 (-0.6, -0.4) | -1.6 (-1.6, -1.5) | -1.9 (-2.0, -1.8) | -2.2 (-2.3, -2.1) | -0.1 (-0.2, 0.1)  | -1.1 (-1.2, -1.0) | -1.4 (-1.5, -1.2) | 2.1 (1.8, 2.3)   | 0.5 (0.4, 0.7)    | 0.2 (0.0, 0.4)    |
| South Asia                   | 0.7 (0.5, 0.8)  | 0.4 (0.3, 0.6)    | 0.2 (0.1, 0.3)    | -1.7 (-1.9, -1.5) | -1.6 (-2.0, -1.3) | -2.1 (-2.4, -1.8) | -1.0 (-1.5, -0.6) | -1.2 (-1.6, -0.8) | -1.4 (-1.8, -0.9) | 1.1 (0.9, 1.4)   | 0.5 (0.0, 1.0)    | 0.5 (0.3, 0.8)    |
| East Asia                    | 1.0 (0.7, 1.2)  | 0.8 (0.6, 0.9)    | 0.3 (0.2, 0.5)    | 1.3 (0.9, 1.6)    | -2.3 (-2.6, -2.1) | -2.7 (-3.0, -2.4) | 5.1 (4.5, 5.6)    | -0.7 (-0.8, -0.6) | 0.1 (-0.2, 0.3)   | 4.9 (4.6, 5.3)   | 1.8 (1.5, 2.0)    | 1.7 (1.5, 2.0)    |
| Oceania                      | 0.1 (-0.1, 0.2) | -0.2 (-0.3, 0.0)  | -0.2 (-0.4, 0.0)  | -1.1 (-1.1, -1.0) | -1.1 (-1.1, -1.0) | -1.1 (-1.3, -0.9) | -0.1 (-0.2, -0.1) | -0.3 (-0.6, 0.1)  | -0.2 (-0.5, 0.1)  | -0.1 (-0.2, 0.1) | -0.4 (-0.5, -0.2) | -0.2 (-0.4, -0.1) |
| Southeast Asia               | 1.0 (1.0, 1.1)  | 0.8 (0.8, 0.9)    | 0.7 (0.6, 0.8)    | -0.6 (-0.8, -0.4) | -0.6 (-0.8, -0.4) | -1.0 (-1.2, -0.8) | -0.1 (-0.2, -0.1) | -0.4 (-0.5, -0.3) | -0.6 (-0.7, -0.5) | 2.1 (1.9, 2.4)   | 1.2 (1.0, 1.4)    | 1.1 (1.0, 1.1)    |
| Central Sub-Saharan Africa   | 0.1 (0.0, 0.2)  | 0.0 (-0.2, 0.1)   | -0.3 (-0.5, -0.1) | -1.2 (-1.3, -1.1) | -1.0 (-1.1, -0.9) | -1.6 (-1.7, -1.4) | -0.7 (-1.0, -0.5) | -0.6 (-0.8, -0.4) | -0.8 (-1.1, -0.5) | 2.6 (2.3, 2.9)   | 2.5 (2.2, 2.7)    | 2.3 (2.1, 2.6)    |
| Eastern Sub-Saharan Africa   | 0.6 (0.6, 0.7)  | 0.5 (0.4, 0.5)    | 0.3 (0.1, 0.5)    | -2.6 (-2.7, -2.5) | -2.3 (-2.4, -2.2) | -3.2 (-3.3, -3.0) | -1.0 (-1.2, -0.9) | -1.0 (-1.1, -0.8) | -1.1 (-1.3, -1.0) | 1.3 (1.1, 1.4)   | 1.1 (0.9, 1.2)    | 0.9 (0.8, 1.0)    |
| Southern Sub-Saharan Africa  | 0.6 (0.5, 0.7)  | 0.3 (0.2, 0.5)    | 0.3 (0.1, 0.4)    | -1.1 (-1.5, -0.7) | -1.1 (-1.6, -0.7) | -1.2 (-1.5, -0.9) | -0.1 (-0.4, 0.1)  | -0.2 (-0.4, 0.0)  | -0.3 (-0.5, -0.2) | 0.7 (0.2, 1.2)   | 0.3 (-0.3, 0.9)   | 0.2 (-0.2, 0.7)   |
| Western Sub-Saharan Africa   | 0.5 (0.4, 0.7)  | 0.4 (0.2, 0.5)    | 0.1 (0.0, 0.3)    | -0.2 (-0.3, -0.1) | -0.1 (-0.2, 0.0)  | -0.4 (-0.5, -0.2) | -0.3 (-0.4, -0.2) | -0.3 (-0.4, -0.1) | -0.3 (-0.4, -0.2) | 0.9 (0.7, 1.0)   | 0.5 (0.4, 0.7)    | 0.5 (0.4, 0.7)    |

Abbreviations: AAPC, average annual percentage change; DALY, disability-adjusted life year; CI, confidence interval; AML, acute myeloid leukemia; CML, chronic myeloid leukemia; ALL, acute lymphoblastic leukemia; CLL, chronic lymphocytic leukemia; SDI, socio-demographic index.



**Supplementary Table 4.** The average annual percentage changes (AAPCs) of ASIR, ASDR and age-standardized DALY rate due to 4 leukemia subtypes from 1990 to 2019 at a national level.

| Regions             | AML               |                   |                            | CML               |                   |                            | ALL               |                   |                            | CLL             |                   |                            |
|---------------------|-------------------|-------------------|----------------------------|-------------------|-------------------|----------------------------|-------------------|-------------------|----------------------------|-----------------|-------------------|----------------------------|
|                     | ASIR              | ASDR              | Age-standardized DALY rate | ASIR              | ASDR              | Age-standardized DALY rate | ASIR              | ASDR              | Age-standardized DALY rate | ASIR            | ASDR              | Age-standardized DALY rate |
| Afghanistan         | 0.4 (0.3, 0.5)    | 0.2 (0.1, 0.3)    | 0.2 (0.0, 0.4)             | -1.2 (-1.3, -1.1) | -1.1 (-1.2, -1.0) | -1.5 (-1.7, -1.3)          | -0.4 (-0.6, -0.1) | -0.3 (-0.5, 0.0)  | -0.5 (-0.8, -0.1)          | 0.8 (0.7, 0.8)  | 0.5 (0.4, 0.6)    | 0.5 (0.4, 0.5)             |
| Albania             | 0.4 (0.0, 0.8)    | 0.1 (-0.3, 0.6)   | 0.3 (-0.1, 0.7)            | 0.9 (0.5, 1.3)    | -1.4 (-1.7, -1.0) | -0.9 (-1.3, -0.6)          | 3.1 (2.6, 3.6)    | 0.0 (-0.7, 0.7)   | 0.3 (-0.5, 1.0)            | 4.8 (4.3, 5.3)  | 2.6 (1.9, 3.3)    | 2.7 (2.1, 3.3)             |
| Algeria             | -0.3 (-0.3, -0.2) | -0.4 (-0.5, -0.3) | -0.7 (-0.8, -0.6)          | -2.0 (-2.0, -1.9) | -2.2 (-2.2, -2.1) | -2.6 (-2.7, -2.5)          | -1.1 (-1.4, -0.9) | -1.8 (-2.0, -1.5) | -2.0 (-2.3, -1.8)          | 1.3 (1.1, 1.4)  | 0.0 (-0.2, 0.1)   | -0.1 (-0.2, 0.0)           |
| American Samoa      | -0.8 (-0.9, -0.6) | -1.0 (-1.2, -0.9) | -0.9 (-1.1, -0.8)          | -1.7 (-2.4, -1.0) | -1.8 (-2.5, -1.1) | -1.6 (-2.0, -1.2)          | -0.6 (-1.1, 0.0)  | -0.7 (-1.3, -0.1) | -0.5 (-1.1, 0.0)           | 0.2 (-0.1, 0.5) | -0.3 (-0.6, -0.1) | -0.1 (-0.3, 0.1)           |
| Andorra             | -0.1 (-0.2, 0.0)  | -0.2 (-0.3, -0.2) | -0.4 (-0.5, -0.3)          | 2.7 (2.3, 3.0)    | -2.9 (-3.0, -2.8) | -2.5 (-2.7, -2.4)          | 2.4 (2.2, 2.6)    | -1.3 (-1.3, -1.2) | -1.2 (-1.4, -1.0)          | 1.3 (1.1, 1.5)  | -0.3 (-0.4, -0.2) | -0.1 (-0.2, 0.0)           |
| Angola              | 0.5 (0.1, 0.9)    | 0.4 (0.0, 0.7)    | 0.1 (-0.4, 0.5)            | -0.8 (-1.3, -0.4) | -0.6 (-1.0, -0.3) | -1.3 (-1.8, -0.9)          | -0.5 (-1.1, 0.1)  | -0.4 (-1.0, 0.2)  | -0.5 (-0.8, -0.2)          | 3.3 (3.1, 3.5)  | 3.1 (2.9, 3.2)    | 2.8 (2.6, 3.0)             |
| Antigua and Barbuda | 1.5 (1.2, 1.8)    | 1.4 (1.2, 1.5)    | 1.2 (0.9, 1.6)             | -1.2 (-1.5, -0.9) | -1.4 (-1.8, -0.9) | -1.7 (-2.1, -1.3)          | 0.7 (0.2, 1.2)    | 0.3 (0.0, 0.7)    | 0.3 (-0.2, 0.8)            | 1.4 (0.6, 2.1)  | 0.8 (-0.1, 1.7)   | 0.4 (-0.3, 1.0)            |
| Argentina           | 0.6 (0.4, 0.8)    | 0.5 (0.3, 0.6)    | 0.0 (-0.2, 0.2)            | -2.9 (-3.4, -2.4) | -3.2 (-3.6, -2.7) | -3.5 (-3.8, -3.1)          | 0.4 (0.2, 0.7)    | -0.4 (-0.6, -0.2) | -0.6 (-0.7, -0.5)          | 0.4 (0.0, 0.7)  | -0.6 (-0.8, -0.4) | -0.7 (-1.0, -0.5)          |
| Armenia             | 0.8 (0.1, 1.5)    | 0.7 (0.1, 1.3)    | 0.2 (-0.5, 1.0)            | -1.6 (-2.0, -1.1) | -1.9 (-2.4, -1.5) | -2.3 (-2.9, -1.7)          | -1.4 (-1.9, -0.9) | -2.7 (-3.2, -2.1) | -2.7 (-3.1, -2.3)          | 0.7 (0.1, 1.3)  | -0.5 (-1.0, 0.0)  | -0.9 (-1.4, -0.4)          |

|            |                   |                   |                   |                   |                   |                   |                   |                   |                   |                 |                   |                   |
|------------|-------------------|-------------------|-------------------|-------------------|-------------------|-------------------|-------------------|-------------------|-------------------|-----------------|-------------------|-------------------|
| Australia  | 0.0 (-0.2, 0.2)   | -0.1 (-0.2, 0.1)  | -0.5 (-0.6, -0.3) | -0.8 (-1.7, 0.1)  | -4.1 (-4.7, -3.5) | -4.3 (-4.8, -3.7) | 1.0 (0.7, 1.3)    | -2.1 (-2.3, -2.0) | -2.3 (-2.6, -2.1) | 0.4 (-0.1, 0.9) | -0.7 (-1.2, -0.3) | -0.9 (-1.2, -0.5) |
| Austria    | 1.5 (1.2, 1.7)    | 1.4 (1.1, 1.6)    | 0.7 (0.4, 0.9)    | 1.6 (1.3, 2.0)    | -3.6 (-3.8, -3.3) | -3.7 (-4.0, -3.3) | 3.4 (3.0, 3.8)    | -1.0 (-1.2, -0.7) | -1.0 (-1.2, -0.7) | 0.7 (0.3, 1.2)  | -0.5 (-0.7, -0.2) | -0.8 (-1.0, -0.6) |
| Azerbaijan | 0.7 (0.4, 1.1)    | 0.5 (0.2, 0.8)    | 0.3 (-0.1, 0.7)   | -0.7 (-1.1, -0.4) | -0.6 (-0.9, -0.3) | -1.4 (-1.9, -0.9) | -0.1 (-0.6, 0.5)  | -0.3 (-0.8, 0.2)  | -0.5 (-1.3, 0.3)  | 2.0 (1.9, 2.2)  | 1.3 (1.0, 1.5)    | 0.7 (0.6, 0.9)    |
| Bahamas    | 0.6 (0.3, 0.9)    | 0.3 (-0.1, 0.8)   | 0.4 (-0.1, 0.9)   | -1.1 (-1.8, -0.5) | -1.2 (-1.8, -0.6) | -1.2 (-1.8, -0.6) | -0.1 (-0.7, 0.5)  | -0.3 (-0.9, 0.3)  | -0.4 (-1.2, 0.3)  | 0.6 (-0.2, 1.3) | 0.0 (-0.6, 0.6)   | -0.1 (-0.6, 0.5)  |
| Bahrain    | -0.4 (-0.7, 0.0)  | -0.6 (-0.9, -0.2) | -0.8 (-1.0, -0.6) | -2.1 (-3.0, -1.2) | -2.7 (-3.8, -1.6) | -3.0 (-3.6, -2.5) | 0.4 (-0.4, 1.1)   | -1.5 (-2.0, -0.9) | -1.6 (-2.2, -1.0) | 0.2 (-0.7, 1.1) | -1.4 (-2.2, -0.5) | -1.8 (-2.7, -0.9) |
| Bangladesh | 0.0 (-0.2, 0.2)   | -0.1 (-0.3, 0.1)  | -0.4 (-0.6, -0.2) | -3.1 (-3.4, -2.8) | -2.9 (-3.3, -2.6) | -3.6 (-3.9, -3.4) | -1.8 (-2.1, -1.5) | -1.8 (-2.1, -1.4) | -1.9 (-2.3, -1.6) | 0.5 (0.2, 0.9)  | -0.2 (-0.6, 0.2)  | -0.3 (-0.6, 0.1)  |
| Barbados   | 0.7 (0.2, 1.1)    | 0.5 (0.2, 0.8)    | 0.2 (-0.2, 0.5)   | -0.2 (-0.7, 0.3)  | -0.4 (-0.9, 0.0)  | -0.7 (-1.3, 0.0)  | 0.1 (-0.6, 0.7)   | -0.5 (-1.2, 0.1)  | -0.8 (-1.4, -0.2) | 1.8 (1.2, 2.4)  | 0.9 (0.8, 1.0)    | 0.7 (0.6, 0.8)    |
| Belarus    | -1.3 (-1.6, -1.0) | -1.3 (-1.7, -1.0) | -2.2 (-2.5, -1.8) | 0.2 (-0.6, 1.0)   | -1.7 (-2.6, -0.9) | -2.3 (-3.1, -1.5) | -0.3 (-1.0, 0.4)  | -3.5 (-4.3, -2.8) | -4.0 (-4.5, -3.5) | 1.6 (1.3, 1.9)  | -0.2 (-0.4, 0.0)  | -0.4 (-0.6, -0.2) |
| Belgium    | 1.1 (0.7, 1.5)    | 1.0 (0.6, 1.4)    | 0.4 (0.1, 0.8)    | 2.4 (1.5, 3.4)    | -3.2 (-3.9, -2.4) | -3.1 (-3.9, -2.4) | 2.5 (2.1, 2.9)    | -2.1 (-2.3, -1.9) | -2.2 (-2.3, -2.0) | 0.8 (0.2, 1.4)  | -0.7 (-1.7, 0.3)  | -0.6 (-1.3, 0.1)  |
| Belize     | 1.5 (1.1, 1.8)    | 1.2 (0.9, 1.6)    | 1.1 (0.9, 1.2)    | 0.1 (-0.2, 0.4)   | 0.1 (-0.2, 0.4)   | 0.0 (-0.4, 0.5)   | -0.4 (-0.8, 0.1)  | -0.4 (-0.9, 0.1)  | -0.7 (-1.2, -0.2) | 2.2 (1.4, 3.0)  | 1.7 (1.1, 2.3)    | 1.7 (1.1, 2.2)    |
| Benin      | 0.7 (0.4, 1.0)    | 0.5 (0.3, 0.8)    | 0.3 (0.0, 0.7)    | -0.3 (-0.5, -0.1) | -0.2 (-0.4, 0.0)  | -0.3 (-0.5, -0.1) | 0.0 (-0.2, 0.2)   | 0.0 (-0.2, 0.2)   | 0.1 (-0.2, 0.3)   | 0.7 (0.6, 0.8)  | 0.5 (0.4, 0.6)    | 0.4 (0.2, 0.5)    |
| Bermuda    | -0.4 (-0.7, -0.2) | -0.6 (-0.9, -0.4) | -0.7 (-0.9, -0.5) | 0.1 (-0.1, 0.3)   | -2.4 (-2.7, -2.2) | -2.6 (-2.8, -2.3) | 3.1 (2.8, 3.4)    | -1.5 (-1.7, -1.2) | -1.2 (-1.5, -1.0) | 1.0 (0.4, 1.5)  | -0.9 (-1.5, -0.3) | -1.0 (-1.5, -0.4) |

|                                     |                 |                  |                   |                   |                   |                   |                   |                   |                   |                |                |                |
|-------------------------------------|-----------------|------------------|-------------------|-------------------|-------------------|-------------------|-------------------|-------------------|-------------------|----------------|----------------|----------------|
| Bhutan                              | 1.3 (1.1, 1.4)  | 1.1 (1.0, 1.2)   | 0.9 (0.6, 1.1)    | -2.1 (-2.3, -1.9) | -1.8 (-2.0, -1.6) | -2.8 (-3.1, -2.5) | -0.5 (-1.1, 0.0)  | -0.5 (-1.0, 0.0)  | -0.7 (-1.3, 0.0)  | 1.7 (1.6, 1.8) | 0.9 (0.8, 1.0) | 0.7 (0.7, 0.8) |
| Bolivia<br>(Plurinational State of) | 1.4 (1.3, 1.5)  | 1.3 (1.2, 1.3)   | 0.9 (0.8, 0.9)    | -0.4 (-0.5, -0.4) | -0.3 (-0.3, -0.2) | -1.0 (-1.1, -1.0) | -0.1 (-0.3, 0.1)  | 0.0 (-0.2, 0.2)   | -0.4 (-0.6, -0.3) | 2.7 (2.5, 2.9) | 2.1 (2.0, 2.1) | 1.6 (1.6, 1.7) |
| Bosnia and Herzegovina              | 1.1 (0.9, 1.4)  | 1.0 (0.7, 1.2)   | 0.7 (0.3, 1.0)    | 1.0 (0.6, 1.3)    | 0.2 (-0.3, 0.7)   | -0.3 (-0.7, 0.2)  | 1.6 (0.9, 2.4)    | -0.4 (-1.3, 0.4)  | -0.5 (-1.7, 0.7)  | 4.8 (4.2, 5.3) | 3.2 (2.7, 3.7) | 3.0 (2.6, 3.3) |
| Botswana                            | 1.6 (1.3, 1.9)  | 1.3 (1.1, 1.6)   | 1.6 (1.4, 1.7)    | 0.0 (-0.2, 0.2)   | -0.1 (-0.3, 0.1)  | 0.1 (-0.1, 0.4)   | 1.2 (0.9, 1.6)    | 1.1 (0.7, 1.4)    | 1.4 (1.1, 1.6)    | 2.2 (1.9, 2.4) | 1.4 (1.3, 1.6) | 1.4 (1.2, 1.7) |
| Brazil                              | 0.3 (0.3, 0.4)  | 0.2 (0.1, 0.3)   | -0.2 (-0.3, -0.1) | -3.0 (-3.2, -2.8) | -2.9 (-3.1, -2.8) | -3.7 (-3.8, -3.5) | -0.3 (-0.4, -0.1) | -0.6 (-0.8, -0.5) | -0.9 (-1.0, -0.7) | 1.2 (1.0, 1.4) | 0.4 (0.2, 0.5) | 0.1 (0.0, 0.2) |
| Brunei Darussalam                   | 0.1 (-0.1, 0.4) | -0.1 (-0.4, 0.2) | -0.1 (-0.4, 0.1)  | -1.2 (-1.9, -0.6) | -1.4 (-2.1, -0.7) | -1.9 (-2.2, -1.5) | 2.0 (1.6, 2.4)    | 1.2 (0.8, 1.6)    | 1.0 (0.5, 1.4)    | 1.4 (1.0, 1.9) | 0.4 (0.2, 0.7) | 0.3 (0.1, 0.5) |
| Bulgaria                            | 1.1 (0.9, 1.3)  | 1.0 (0.7, 1.2)   | 0.7 (0.5, 1.0)    | -1.6 (-2.2, -1.0) | -2.1 (-2.5, -1.6) | -2.6 (-3.2, -2.0) | 0.6 (0.2, 1.0)    | -0.8 (-1.1, -0.5) | -1.1 (-1.6, -0.7) | 2.3 (1.9, 2.6) | 1.2 (0.9, 1.5) | 1.1 (0.9, 1.4) |
| Burkina Faso                        | 1.1 (1.0, 1.3)  | 1.0 (0.7, 1.2)   | 0.9 (0.7, 1.1)    | 0.1 (0.5, 3.3)    | 0.4 (0.2, 0.6)    | 0.4 (0.1, 0.6)    | 0.7 (0.4, 0.9)    | 0.6 (0.4, 0.9)    | 0.8 (0.6, 1.1)    | 1.0 (0.6, 1.3) | 0.7 (0.4, 1.0) | 0.7 (0.4, 1.0) |
| Burundi                             | 1.0 (0.8, 1.3)  | 0.9 (0.6, 1.2)   | 0.6 (0.4, 0.9)    | -2.0 (-2.5, -1.5) | -1.8 (-2.2, -1.4) | -2.3 (-3.0, -1.6) | 0.1 (-0.2, 0.4)   | 0.2 (-0.2, 0.5)   | 0.0 (-0.3, 0.3)   | 0.7 (0.5, 0.9) | 0.6 (0.5, 0.8) | 0.5 (0.3, 0.7) |
| Cabo Verde                          | 1.2 (1.0, 1.5)  | 1.2 (0.9, 1.5)   | 0.6 (0.4, 0.8)    | 1.0 (0.5, 1.4)    | 1.1 (0.4, 1.9)    | 0.1 (-0.3, 0.4)   | 0.1 (-0.3, 0.5)   | 0.1 (-0.4, 0.5)   | -0.6 (-0.9, -0.3) | 3.5 (2.3, 4.8) | 2.9 (2.3, 3.6) | 2.5 (1.9, 3.2) |
| Cambodia                            | 1.0 (0.9, 1.1)  | 0.8 (0.7, 0.9)   | 0.6 (0.4, 0.7)    | -0.6 (-0.7, -0.5) | -0.5 (-0.7, -0.3) | -1.1 (-1.2, -0.9) | -0.6 (-0.7, -0.4) | -0.5 (-0.6, -0.3) | -0.9 (-1.2, -0.6) | 1.6 (1.5, 1.8) | 1.1 (1.0, 1.1) | 0.8 (0.8, 0.9) |

|                          |                   |                   |                   |                   |                   |                   |                   |                   |                   |                  |                   |                   |
|--------------------------|-------------------|-------------------|-------------------|-------------------|-------------------|-------------------|-------------------|-------------------|-------------------|------------------|-------------------|-------------------|
| Cameroon                 | 0.7 (0.3, 1.0)    | 0.5 (0.2, 0.7)    | 0.4 (-0.1, 0.9)   | -0.3 (-0.4, -0.3) | -0.3 (-0.4, -0.3) | -0.3 (-0.4, -0.2) | 1.1 (0.6, 1.6)    | 1.1 (0.5, 1.6)    | 1.3 (0.7, 1.9)    | 0.7 (0.5, 0.9)   | 0.4 (0.2, 0.6)    | 0.3 (0.1, 0.5)    |
| Canada                   | 0.9 (0.8, 1.0)    | 0.7 (0.6, 0.9)    | 0.3 (0.2, 0.4)    | 1.2 (0.7, 1.8)    | -3.8 (-4.1, -3.4) | -3.8 (-4.1, -3.4) | 1.8 (1.3, 2.2)    | -1.6 (-1.8, -1.3) | -1.6 (-2.0, -1.2) | 0.6 (-0.1, 1.2)  | -0.7 (-1.3, 0.0)  | -0.8 (-1.4, -0.3) |
| Central African Republic | 0.0 (-0.1, 0.1)   | -0.2 (-0.3, -0.1) | -0.3 (-0.4, -0.2) | -0.6 (-0.7, -0.4) | -0.6 (-0.7, -0.4) | -0.6 (-0.8, -0.4) | -0.2 (-0.4, -0.1) | -0.3 (-0.4, -0.1) | -0.2 (-0.4, -0.1) | 2.2 (1.8, 2.5)   | 2.2 (1.9, 2.5)    | 2.0 (1.7, 2.3)    |
| Chad                     | 1.1 (0.8, 1.3)    | 0.9 (0.7, 1.1)    | 0.8 (0.4, 1.1)    | 0.6 (0.4, 0.7)    | 0.7 (0.6, 0.8)    | 0.4 (0.3, 0.6)    | 0.6 (0.2, 0.9)    | 0.6 (0.2, 1.0)    | 0.6 (0.2, 1.0)    | 0.8 (0.7, 0.9)   | 0.7 (0.6, 0.8)    | 0.6 (0.5, 0.7)    |
| Chile                    | 0.7 (0.4, 1.0)    | 0.7 (0.4, 0.9)    | 0.1 (-0.1, 0.3)   | -1.4 (-2.2, -0.6) | -2.6 (-3.1, -2.1) | -3.2 (-3.9, -2.5) | 2.2 (1.8, 2.7)    | -0.5 (-1.0, -0.1) | -0.8 (-1.3, -0.4) | 1.8 (1.7, 2.0)   | 0.2 (0.1, 0.4)    | -0.1 (-0.2, 0.1)  |
| China                    | 0.8 (0.7, 1.0)    | 0.7 (0.5, 0.8)    | 0.3 (0.2, 0.4)    | 1.2 (0.8, 1.6)    | -2.4 (-2.8, -2.1) | -2.7 (-3.0, -2.4) | 5.1 (4.6, 5.6)    | 0.4 (0.2, 0.6)    | 0.2 (-0.1, 0.4)   | 5.1 (4.7, 5.4)   | 1.8 (1.5, 2.0)    | 1.8 (1.5, 2.0)    |
| Colombia                 | 1.4 (1.2, 1.7)    | 1.3 (1.0, 1.5)    | 1.2 (0.9, 1.4)    | -0.9 (-1.7, -0.2) | -1.6 (-2.4, -0.9) | -2.1 (-2.4, -1.7) | 1.6 (1.3, 1.9)    | 0.4 (0.0, 0.7)    | 0.4 (0.0, 0.7)    | 0.5 (-0.4, 1.4)  | -0.9 (-1.8, 0.0)  | -1.1 (-2.1, -0.1) |
| Comoros                  | 0.8 (-0.5, 2.2)   | 0.7 (-0.3, 1.7)   | 0.5 (-1.0, 2.1)   | -0.5 (-1.8, 0.8)  | -0.5 (-1.9, 1.0)  | -0.7 (-2.2, 0.9)  | 0.5 (-1.1, 2.1)   | 0.5 (-1.0, 2.1)   | 0.5 (-1.1, 2.2)   | 1.9 (1.8, 2.0)   | 1.6 (1.4, 1.7)    | 1.5 (1.3, 1.7)    |
| Congo                    | 0.2 (0.0, 0.4)    | 0.1 (-0.1, 0.2)   | -0.1 (-0.4, 0.1)  | -1.4 (-1.6, -1.2) | -1.3 (-1.5, -1.1) | -1.6 (-1.9, -1.3) | -0.7 (-1.2, -0.3) | -0.7 (-1.1, -0.3) | -0.8 (-1.2, -0.3) | 2.2 (1.9, 2.4)   | 1.9 (1.7, 2.1)    | 1.8 (1.5, 2.0)    |
| Cook Islands             | -0.4 (-0.4, -0.3) | -0.5 (-0.6, -0.5) | -0.7 (-0.8, -0.7) | -0.9 (-1.1, -0.8) | -1.4 (-1.6, -1.3) | -1.5 (-1.6, -1.5) | -0.3 (-0.4, -0.2) | -1.3 (-1.4, -1.2) | -1.7 (-1.8, -1.6) | -0.1 (-0.2, 0.1) | -1.3 (-1.4, -1.2) | -1.2 (-1.3, -1.1) |
| Costa Rica               | 0.6 (0.0, 1.2)    | 0.4 (0.0, 0.9)    | 0.3 (0.1, 0.6)    | -1.5 (-3.0, 0.0)  | -2.2 (-3.2, -1.3) | -2.2 (-3.3, -1.1) | 1.2 (0.2, 2.3)    | -0.3 (-1.3, 0.6)  | -0.5 (-1.4, 0.4)  | 0.9 (-0.6, 2.5)  | 0.0 (-1.5, 1.6)   | -0.1 (-1.7, 1.5)  |
| Croatia                  | 2.7 (2.1, 3.3)    | 2.8 (2.2, 3.4)    | 1.5 (1.0, 2.0)    | 2.6 (2.1, 3.2)    | -1.4 (-1.9, -0.9) | -2.0 (-2.3, -1.7) | -0.2 (-0.5, 0.0)  | -0.5 (-1.0, 0.0)  | -0.2 (-0.4, 0.0)  | 0.7 (-0.2, 1.6)  | -0.7 (-1.4, 0.0)  | -0.9 (-1.8, 0.1)  |

|                                       |                   |                   |                   |                   |                   |                   |                   |                   |                   |                |                   |                   |
|---------------------------------------|-------------------|-------------------|-------------------|-------------------|-------------------|-------------------|-------------------|-------------------|-------------------|----------------|-------------------|-------------------|
| Cuba                                  | 0.0 (-0.3, 0.2)   | -0.1 (-0.3, 0.1)  | -0.6 (-1.0, -0.1) | -0.6 (-1.2, -0.1) | -1.6 (-1.7, -1.5) | -1.9 (-2.2, -1.6) | 4.0 (3.5, 4.6)    | -1.3 (-1.7, -0.9) | -0.8 (-1.4, -0.2) | 0.8 (0.7, 0.9) | -0.3 (-0.5, -0.2) | -0.4 (-0.7, -0.2) |
| Cyprus                                | 1.0 (0.8, 1.2)    | 0.9 (0.6, 1.1)    | 0.4 (0.2, 0.6)    | 4.1 (3.2, 5.0)    | -3.2 (-4.3, -2.0) | -2.5 (-3.1, -1.9) | 0.2 (-0.2, 0.7)   | -1.2 (-1.4, -0.9) | -1.6 (-2.0, -1.2) | 3.1 (2.5, 3.7) | 0.7 (0.1, 1.2)    | 0.7 (0.2, 1.2)    |
| Czechia                               | -0.3 (-0.4, -0.1) | -0.4 (-0.5, -0.2) | -0.9 (-1.1, -0.7) | 1.1 (-0.1, 2.2)   | -3.1 (-3.8, -2.4) | -3.2 (-3.6, -2.7) | 5.9 (4.8, 7.1)    | -4.6 (-5.0, -4.2) | -0.8 (-1.1, -0.4) | 2.7 (1.8, 3.6) | 1.2 (0.3, 2.0)    | 0.8 (0.2, 1.4)    |
| Côte d'Ivoire                         | 0.5 (0.3, 0.6)    | 0.3 (0.1, 0.5)    | 0.2 (0.0, 0.4)    | -0.3 (-0.4, -0.1) | -0.2 (-0.4, -0.1) | -0.3 (-0.5, -0.2) | 0.6 (-0.4, 1.6)   | -0.2 (-0.5, 0.0)  | -4.3 (-4.7, -3.9) | 0.5 (0.3, 0.6) | 0.3 (0.1, 0.5)    | 0.2 (0.1, 0.3)    |
| Democratic People's Republic of Korea | 0.0 (-0.1, 0.0)   | -0.2 (-0.3, -0.1) | -0.4 (-0.5, -0.3) | -1.9 (-2.0, -1.8) | -1.9 (-2.0, -1.7) | -2.1 (-2.1, -2.0) | -0.2 (-0.3, -0.1) | -0.1 (-0.2, 0.0)  | -0.5 (-0.7, -0.3) | 0.7 (0.5, 0.8) | 0.4 (0.2, 0.5)    | 0.4 (0.3, 0.6)    |
| Democratic Republic of the Congo      | -0.1 (-0.3, 0.1)  | -0.3 (-0.5, 0.0)  | -0.5 (-0.8, -0.3) | -1.4 (-1.7, -1.2) | -1.3 (-1.5, -1.0) | -1.8 (-2.0, -1.6) | -0.8 (-1.2, -0.5) | -0.7 (-1.1, -0.3) | -0.9 (-1.3, -0.5) | 2.5 (2.4, 2.7) | 2.4 (2.1, 2.7)    | 2.3 (1.9, 2.6)    |
| Denmark                               | -1.5 (-1.9, -1.1) | -1.3 (-1.6, -1.0) | -2.0 (-2.5, -1.5) | -0.5 (-1.1, 0.0)  | -5.1 (-5.7, -4.6) | -5.3 (-5.8, -4.8) | 1.8 (1.0, 2.6)    | -2.6 (-3.2, -2.1) | -2.8 (-3.3, -2.4) | 0.7 (0.5, 0.9) | -0.7 (-0.9, -0.4) | -1.0 (-1.2, -0.9) |
| Djibouti                              | 1.5 (1.1, 2.0)    | 1.4 (1.0, 1.7)    | 1.2 (0.9, 1.6)    | 0.1 (-0.2, 0.4)   | 0.2 (0.0, 0.5)    | -0.1 (-0.4, 0.3)  | 1.2 (0.9, 1.6)    | 1.2 (0.8, 1.5)    | 1.3 (0.9, 1.6)    | 1.9 (1.8, 2.1) | 1.6 (1.5, 1.7)    | 1.7 (1.5, 1.8)    |
| Dominica                              | 1.0 (0.7, 1.3)    | 0.6 (0.5, 0.8)    | 0.7 (0.5, 0.9)    | 0.1 (0.0, 0.3)    | 0.2 (0.0, 0.4)    | 0.1 (-0.1, 0.2)   | 0.7 (0.3, 1.0)    | 0.6 (0.3, 0.9)    | 0.6 (0.3, 1.0)    | 1.1 (0.7, 1.4) | 0.9 (0.7, 1.2)    | 0.8 (0.4, 1.2)    |
| Dominican Republic                    | 2.6 (2.2, 3.1)    | 2.5 (2.1, 2.8)    | 2.1 (1.7, 2.6)    | 1.7 (0.9, 2.5)    | 1.7 (1.0, 2.5)    | 1.4 (0.6, 2.2)    | 0.7 (0.3, 1.2)    | 0.8 (0.3, 1.2)    | 0.3 (-0.2, 0.8)   | 3.6 (3.0, 4.3) | 2.9 (2.3, 3.4)    | 2.8 (2.3, 3.3)    |

|                   |                   |                   |                   |                   |                   |                   |                   |                   |                   |                 |                   |                   |
|-------------------|-------------------|-------------------|-------------------|-------------------|-------------------|-------------------|-------------------|-------------------|-------------------|-----------------|-------------------|-------------------|
| Ecuador           | 2.4 (2.1, 2.6)    | 2.2 (2.0, 2.4)    | 1.8 (1.5, 2.2)    | 0.6 (0.2, 0.9)    | 0.6 (0.3, 0.9)    | 0.2 (-0.1, 0.6)   | 1.4 (1.1, 1.8)    | 1.2 (0.8, 1.5)    | 1.0 (0.6, 1.4)    | 3.5 (2.8, 4.2)  | 2.3 (1.5, 3.1)    | 2.2 (1.6, 2.8)    |
| Egypt             | 0.6 (0.3, 0.8)    | 0.4 (0.2, 0.6)    | 0.1 (-0.1, 0.4)   | -0.8 (-0.9, -0.8) | -0.8 (-0.9, -0.6) | -1.3 (-1.4, -1.2) | -0.6 (-1.1, -0.1) | -0.8 (-1.0, -0.6) | -1.2 (-1.5, -0.8) | 2.9 (1.9, 4.0)  | 1.7 (1.1, 2.4)    | 1.5 (1.4, 1.7)    |
| El Salvador       | 3.3 (2.8, 3.8)    | 3.2 (2.9, 3.6)    | 2.7 (2.4, 3.0)    | 1.7 (1.1, 2.3)    | 1.8 (1.1, 2.5)    | 1.0 (0.4, 1.7)    | 2.7 (2.3, 3.1)    | 2.4 (2.0, 2.8)    | 1.9 (1.5, 2.2)    | 4.7 (4.0, 5.5)  | 3.5 (2.8, 4.2)    | 3.3 (2.6, 4.1)    |
| Equatorial Guinea | 2.0 (1.7, 2.2)    | 1.9 (1.6, 2.1)    | 1.4 (1.0, 1.9)    | -1.1 (-1.4, -0.9) | -0.9 (-1.0, -0.8) | -1.7 (-2.0, -1.5) | -1.3 (-1.9, -0.7) | -1.2 (-1.7, -0.7) | -1.5 (-2.1, -0.9) | 4.5 (4.0, 5.0)  | 3.9 (3.6, 4.3)    | 3.5 (3.1, 3.9)    |
| Eritrea           | 2.0 (1.7, 2.4)    | 1.8 (1.5, 2.1)    | 1.8 (1.5, 2.0)    | -0.4 (-0.6, -0.1) | -0.2 (-0.4, 0.0)  | -0.6 (-0.8, -0.3) | 1.1 (0.8, 1.3)    | 1.0 (0.8, 1.3)    | 1.1 (0.8, 1.3)    | 2.5 (2.3, 2.7)  | 2.3 (2.1, 2.4)    | 2.2 (2.0, 2.4)    |
| Estonia           | 0.5 (-0.1, 1.1)   | 0.5 (-0.1, 1.1)   | -0.3 (-0.9, 0.3)  | 1.6 (1.0, 2.1)    | -1.3 (-2.3, -0.4) | -1.9 (-2.5, -1.2) | 3.3 (2.8, 3.8)    | -1.4 (-1.8, -1.1) | -1.7 (-2.3, -1.2) | 4.9 (3.3, 6.5)  | 3.0 (1.4, 4.6)    | 2.5 (0.9, 4.1)    |
| Eswatini          | 1.4 (1.2, 1.5)    | 1.1 (1.0, 1.2)    | 1.3 (1.2, 1.4)    | 0.4 (0.1, 0.6)    | 0.4 (0.1, 0.6)    | 0.4 (0.1, 0.6)    | 1.1 (0.9, 1.4)    | 1.1 (0.8, 1.3)    | 1.2 (1.0, 1.3)    | 1.2 (0.9, 1.6)  | 1.1 (0.8, 1.4)    | 1.0 (0.6, 1.4)    |
| Ethiopia          | 0.3 (0.2, 0.3)    | 0.2 (0.1, 0.2)    | -0.2 (-0.3, -0.1) | -3.1 (-3.2, -2.9) | -2.8 (-2.9, -2.6) | -3.8 (-4.0, -3.5) | -1.6 (-1.9, -1.3) | -1.6 (-1.9, -1.3) | -1.9 (-2.2, -1.5) | 0.6 (0.5, 0.8)  | 0.3 (0.2, 0.5)    | 0.2 (0.1, 0.3)    |
| Fiji              | 0.4 (0.0, 0.7)    | 0.2 (-0.2, 0.5)   | 0.2 (-0.1, 0.5)   | -1.8 (-2.4, -1.2) | -1.8 (-2.4, -1.2) | -2.0 (-2.5, -1.5) | -1.0 (-1.2, -0.7) | -1.0 (-1.1, -0.8) | -0.9 (-1.2, -0.7) | 0.0 (-0.1, 0.2) | -0.2 (-0.4, -0.1) | -0.3 (-0.4, -0.2) |
| Finland           | -0.8 (-0.9, -0.6) | -0.6 (-0.8, -0.3) | -1.0 (-1.1, -1.0) | -0.8 (-2.0, 0.4)  | -5.0 (-5.6, -4.5) | -5.0 (-5.6, -4.5) | 3.3 (3.0, 3.5)    | -1.6 (-2.0, -1.1) | -1.5 (-2.2, -0.9) | 0.5 (0.0, 0.9)  | -1.1 (-1.4, -0.7) | -1.2 (-1.6, -0.9) |
| France            | 1.0 (0.8, 1.1)    | 0.9 (0.6, 1.1)    | 0.1 (0.0, 0.2)    | 2.8 (2.2, 3.3)    | -3.2 (-3.5, -2.9) | -3.6 (-3.9, -3.3) | 3.8 (3.6, 4.0)    | -1.5 (-1.6, -1.3) | -1.3 (-1.5, -1.2) | 0.8 (0.5, 1.1)  | -0.7 (-0.9, -0.5) | -0.9 (-1.1, -0.8) |
| Gabon             | 0.3 (0.0, 0.5)    | 0.2 (-0.1, 0.4)   | -0.1 (-0.4, 0.3)  | -1.1 (-1.2, -0.9) | -1.0 (-1.1, -0.8) | -1.3 (-1.5, -1.1) | -0.6 (-1.1, -0.2) | -0.6 (-1.0, -0.2) | -0.8 (-1.3, -0.3) | 2.5 (2.2, 2.9)  | 2.2 (1.9, 2.6)    | 2.0 (1.7, 2.4)    |

|               |                   |                   |                   |                   |                   |                   |                   |                   |                   |                   |                   |                   |
|---------------|-------------------|-------------------|-------------------|-------------------|-------------------|-------------------|-------------------|-------------------|-------------------|-------------------|-------------------|-------------------|
| Gambia        | 0.6 (-0.5, 1.7)   | 0.5 (-0.5, 1.5)   | 0.2 (-0.9, 1.3)   | 0.3 (-0.3, 0.9)   | 0.3 (-0.3, 0.9)   | 0.2 (-0.5, 0.9)   | 0.1 (-0.9, 1.1)   | 0.2 (-0.8, 1.2)   | 0.0 (-0.9, 1.0)   | 1.3 (0.5, 2.1)    | 1.1 (0.3, 1.8)    | 1.1 (0.2, 2.0)    |
| Georgia       | 0.3 (-0.4, 1.0)   | 0.3 (-0.4, 1.0)   | -0.4 (-1.2, 0.4)  | -0.2 (-1.3, 0.8)  | -0.1 (-1.1, 0.8)  | -0.7 (-1.8, 0.3)  | -1.4 (-2.2, -0.6) | -1.6 (-2.3, -0.9) | -2.0 (-2.7, -1.3) | 3.0 (2.2, 3.9)    | 3.0 (2.3, 3.7)    | 2.5 (1.9, 3.1)    |
| Germany       | 0.8 (0.6, 1.0)    | 1.0 (0.9, 1.2)    | 0.2 (-0.1, 0.4)   | 1.6 (1.1, 2.2)    | -3.7 (-4.1, -3.3) | -3.9 (-4.2, -3.7) | 2.6 (2.3, 3.0)    | -1.4 (-1.6, -1.2) | -1.5 (-1.6, -1.3) | 1.3 (0.9, 1.6)    | 0.0 (-0.2, 0.2)   | -0.3 (-0.5, -0.1) |
| Ghana         | 0.0 (-0.2, 0.2)   | -0.1 (-0.3, 0.1)  | -0.4 (-0.6, -0.1) | -0.9 (-1.0, -0.8) | -0.8 (-0.9, -0.7) | -1.2 (-1.3, -1.0) | -2.7 (-3.0, -2.5) | -2.5 (-2.8, -2.3) | -3.0 (-3.3, -2.7) | 0.5 (0.3, 0.7)    | 0.2 (0.1, 0.3)    | 0.1 (-0.1, 0.3)   |
| Greece        | 1.7 (1.3, 2.1)    | 1.6 (1.2, 1.9)    | 1.1 (0.8, 1.4)    | 2.5 (1.6, 3.4)    | -1.5 (-1.9, -1.2) | -1.5 (-2.0, -1.1) | 2.4 (2.1, 2.7)    | -0.7 (-1.1, -0.3) | -0.7 (-0.9, -0.5) | 1.5 (1.0, 2.0)    | 0.3 (-0.2, 0.8)   | 0.3 (-0.2, 0.8)   |
| Greenland     | -0.3 (-0.5, -0.1) | -0.5 (-0.6, -0.3) | -0.7 (-0.9, -0.5) | -2.3 (-2.7, -2.0) | -2.4 (-2.8, -2.0) | -2.7 (-2.9, -2.4) | -1.6 (-2.3, -0.9) | -2.1 (-2.4, -1.7) | -2.5 (-3.2, -1.7) | -0.4 (-0.8, -0.1) | -1.3 (-1.7, -0.9) | -1.3 (-1.6, -1.0) |
| Grenada       | 0.9 (0.7, 1.2)    | 0.7 (0.5, 1.0)    | 0.5 (0.2, 0.8)    | -2.8 (-3.2, -2.3) | -2.8 (-3.2, -2.3) | -2.8 (-3.3, -2.4) | -1.5 (-1.8, -1.1) | -1.6 (-1.9, -1.2) | -1.9 (-2.2, -1.5) | -1.4 (-2.1, -0.7) | -2.2 (-2.9, -1.4) | -1.9 (-2.6, -1.3) |
| Guam          | -1.9 (-2.9, -0.9) | -2.3 (-3.3, -1.2) | -1.8 (-2.6, -1.0) | -1.6 (-2.8, -0.5) | -2.0 (-3.1, -0.8) | -1.0 (-2.1, 0.1)  | -1.0 (-1.8, -0.1) | -1.3 (-1.9, -0.8) | -1.3 (-1.7, -0.9) | -2.3 (-3.3, -1.3) | -3.4 (-4.2, -2.6) | -2.0 (-2.8, -1.2) |
| Guatemala     | 5.4 (4.8, 5.9)    | 4.9 (4.4, 5.5)    | 5.1 (4.6, 5.6)    | 0.7 (0.2, 1.2)    | 0.8 (0.5, 1.2)    | 0.6 (0.2, 1.0)    | 5.6 (5.2, 6.1)    | 5.6 (5.2, 6.0)    | 5.5 (5.1, 5.8)    | 2.9 (2.2, 3.7)    | 2.0 (1.7, 2.4)    | 2.0 (1.7, 2.3)    |
| Guinea        | 0.4 (0.0, 0.7)    | 0.2 (0.0, 0.5)    | 0.0 (-0.4, 0.4)   | -0.1 (-0.2, 0.0)  | -0.1 (-0.1, 0.0)  | -0.2 (-0.3, -0.1) | 0.1 (-0.3, 0.5)   | 0.1 (-0.2, 0.5)   | 0.1 (-0.4, 0.6)   | 0.5 (0.4, 0.6)    | 0.3 (0.2, 0.4)    | 0.3 (0.2, 0.4)    |
| Guinea-Bissau | 0.2 (0.0, 0.3)    | 0.0 (-0.2, 0.2)   | -0.4 (-0.6, -0.2) | -0.8 (-0.9, -0.7) | -0.8 (-0.8, -0.7) | -0.9 (-1.0, -0.8) | -0.7 (-1.3, -0.1) | -0.6 (-1.2, -0.1) | -0.6 (-0.9, -0.4) | 0.5 (0.4, 0.5)    | 0.3 (0.2, 0.4)    | 0.2 (0.1, 0.3)    |
| Guyana        | 0.8 (0.5, 1.0)    | 0.5 (0.2, 0.7)    | 0.6 (0.2, 1.0)    | -1.4 (-1.7, -1.2) | -1.4 (-1.7, -1.2) | -1.4 (-1.7, -1.1) | 0.8 (-0.2, 1.8)   | 0.8 (-0.1, 1.8)   | 0.6 (-0.5, 1.7)   | 4.2 (3.1, 5.5)    | 3.6 (3.1, 4.2)    | 3.9 (3.3, 4.6)    |

|                            |                   |                   |                   |                   |                   |                   |                   |                   |                   |                   |                   |                   |
|----------------------------|-------------------|-------------------|-------------------|-------------------|-------------------|-------------------|-------------------|-------------------|-------------------|-------------------|-------------------|-------------------|
| Haiti                      | 0.4 (0.1, 0.7)    | 0.2 (0.0, 0.4)    | 0.0 (-0.3, 0.3)   | -1.8 (-1.9, -1.7) | -1.6 (-1.7, -1.5) | -2.1 (-2.2, -2.0) | -0.3 (-0.5, 0.0)  | -0.2 (-0.4, 0.0)  | -0.2 (-0.5, 0.1)  | 0.5 (0.3, 0.6)    | 0.3 (0.3, 0.4)    | 0.2 (0.1, 0.3)    |
| Honduras                   | 0.7 (0.7, 0.8)    | 0.7 (0.5, 0.9)    | 0.0 (-0.1, 0.0)   | 0.1 (-0.5, 0.6)   | 0.3 (-0.2, 0.9)   | -0.6 (-0.9, -0.4) | -0.6 (-0.7, -0.5) | -0.3 (-0.4, -0.3) | -1.3 (-1.5, -1.1) | 3.3 (2.7, 3.8)    | 2.8 (2.3, 3.3)    | 2.4 (1.9, 2.9)    |
| Hungary                    | 0.6 (0.3, 1.0)    | 0.5 (0.2, 0.8)    | 0.0 (-0.3, 0.4)   | -1.9 (-2.5, -1.3) | -4.4 (-5.2, -3.6) | -4.8 (-5.5, -4.1) | 1.8 (1.3, 2.3)    | -2.2 (-2.6, -1.7) | -2.3 (-2.8, -1.8) | 1.0 (0.7, 1.2)    | -0.6 (-1.1, 0.0)  | -0.7 (-1.1, -0.4) |
| Iceland                    | 0.3 (0.0, 0.5)    | 0.0 (-0.2, 0.2)   | -0.4 (-0.6, -0.2) | 2.2 (1.7, 2.7)    | -2.6 (-2.9, -2.3) | -2.5 (-2.9, -2.1) | 1.3 (0.7, 1.9)    | -1.3 (-1.8, -0.7) | -1.5 (-2.1, -0.9) | -1.5 (-2.1, -1.0) | -2.8 (-3.1, -2.5) | -2.7 (-3.1, -2.2) |
| India                      | 0.6 (0.4, 0.8)    | 0.4 (0.2, 0.5)    | 0.1 (-0.1, 0.3)   | -1.7 (-2.0, -1.3) | -1.6 (-2.0, -1.3) | -2.1 (-2.5, -1.7) | -1.5 (-2.2, -0.8) | -1.7 (-2.4, -0.9) | -1.9 (-2.8, -1.1) | 1.2 (0.8, 1.5)    | 0.5 (-0.3, 1.3)   | 0.6 (0.2, 0.9)    |
| Indonesia                  | 1.1 (1.0, 1.1)    | 0.9 (0.9, 1.0)    | 0.6 (0.5, 0.6)    | -0.5 (-0.5, -0.4) | -0.3 (-0.3, -0.2) | -1.1 (-1.1, -1.0) | -0.5 (-0.6, -0.4) | -0.3 (-0.4, -0.2) | -0.9 (-1.0, -0.7) | 2.6 (2.5, 2.8)    | 2.2 (2.1, 2.4)    | 1.9 (1.7, 2.0)    |
| Iran (Islamic Republic of) | -0.2 (-0.4, -0.1) | -0.4 (-0.5, -0.3) | -0.7 (-0.9, -0.5) | -1.6 (-1.7, -1.5) | -2.0 (-2.1, -1.9) | -2.4 (-2.6, -2.3) | 0.3 (-0.2, 0.7)   | -1.3 (-1.5, -1.0) | -1.6 (-1.7, -1.4) | 1.7 (1.3, 2.0)    | -0.1 (-0.3, 0.0)  | -0.2 (-0.4, -0.1) |
| Iraq                       | 0.5 (0.4, 0.7)    | 0.4 (0.2, 0.6)    | 0.2 (0.1, 0.4)    | -1.8 (-2.0, -1.6) | -1.8 (-1.9, -1.6) | -2.3 (-2.4, -2.1) | -0.5 (-0.7, -0.2) | -0.8 (-1.0, -0.5) | -1.3 (-1.6, -1.1) | 2.1 (1.6, 2.5)    | 1.0 (0.6, 1.4)    | 0.8 (0.4, 1.1)    |
| Ireland                    | 0.5 (0.3, 0.7)    | 0.5 (0.2, 0.8)    | 0.0 (-0.3, 0.4)   | 2.3 (1.7, 2.9)    | -5.2 (-5.8, -4.6) | -4.7 (-5.5, -4.0) | 3.1 (2.8, 3.4)    | -2.5 (-2.9, -2.2) | -2.1 (-2.6, -1.6) | 1.3 (0.5, 2.0)    | -0.6 (-1.2, -0.1) | -0.7 (-1.3, -0.1) |
| Israel                     | 0.3 (0.2, 0.5)    | 0.2 (0.1, 0.3)    | -0.3 (-0.4, -0.2) | 0.9 (0.6, 1.2)    | -3.6 (-3.9, -3.4) | -3.8 (-4.2, -3.4) | 3.6 (3.3, 4.0)    | -1.8 (-2.1, -1.6) | -1.7 (-2.0, -1.4) | 0.9 (0.7, 1.1)    | -0.7 (-1.0, -0.4) | -0.8 (-1.1, -0.6) |
| Italy                      | 1.2 (1.1, 1.4)    | 1.2 (1.2, 1.3)    | 0.4 (0.3, 0.5)    | 1.5 (0.9, 2.2)    | -3.9 (-4.2, -3.7) | -4.3 (-4.5, -4.0) | 2.2 (2.0, 2.5)    | -1.2 (-1.5, -0.8) | -1.2 (-1.6, -0.9) | 0.8 (0.7, 0.9)    | -0.4 (-0.6, -0.2) | -0.7 (-0.8, -0.5) |
| Jamaica                    | 3.3 (1.6, 5.0)    | 3.1 (1.5, 4.8)    | 2.6 (1.4, 3.8)    | 2.7 (1.0, 4.5)    | 2.9 (1.4, 4.4)    | 3.2 (1.5, 4.8)    | -0.1 (-1.0, 0.8)  | -0.2 (-1.0, 0.6)  | -0.6 (-1.5, 0.3)  | 6.0 (5.2, 6.7)    | 5.2 (4.5, 5.9)    | 5.3 (4.5, 6.0)    |



|                                  |                   |                   |                   |                   |                   |                   |                   |                   |                   |                   |                   |                   |
|----------------------------------|-------------------|-------------------|-------------------|-------------------|-------------------|-------------------|-------------------|-------------------|-------------------|-------------------|-------------------|-------------------|
| Japan                            | -0.1 (-0.2, 0.0)  | -0.1 (-0.2, 0.0)  | -0.8 (-1.0, -0.6) | 0.3 (-0.4, 1.0)   | -4.9 (-5.3, -4.5) | -5.4 (-5.8, -4.9) | 2.3 (1.9, 2.7)    | -1.8 (-2.1, -1.6) | -1.9 (-2.2, -1.5) | 0.6 (0.4, 0.8)    | -1.0 (-1.2, -0.9) | -1.0 (-1.1, -0.8) |
| Jordan                           | 1.0 (0.8, 1.3)    | 0.9 (0.7, 1.1)    | 0.6 (0.5, 0.8)    | -1.3 (-1.7, -1.0) | -1.8 (-2.1, -1.4) | -2.1 (-2.4, -1.8) | 1.7 (1.5, 1.8)    | 0.2 (0.1, 0.3)    | 0.2 (0.0, 0.4)    | 2.2 (1.8, 2.7)    | 0.6 (0.1, 1.1)    | 0.3 (0.0, 0.5)    |
| Kazakhstan                       | -0.6 (-0.9, -0.3) | -0.7 (-0.8, -0.5) | -1.2 (-1.4, -0.9) | -2.0 (-2.4, -1.5) | -2.1 (-2.6, -1.7) | -2.7 (-3.3, -2.2) | -0.8 (-1.1, -0.5) | -1.6 (-1.9, -1.4) | -2.1 (-2.5, -1.7) | 1.2 (1.0, 1.5)    | 0.1 (-0.4, 0.6)   | -0.3 (-0.8, 0.1)  |
| Kenya                            | 0.8 (0.6, 0.9)    | 0.8 (0.7, 0.9)    | 0.6 (0.4, 0.8)    | -1.1 (-1.3, -0.9) | -0.6 (-0.9, -0.4) | -1.5 (-1.8, -1.2) | 0.1 (-0.2, 0.4)   | 0.3 (0.0, 0.6)    | 0.1 (-0.2, 0.4)   | 1.1 (0.9, 1.3)    | 1.2 (1.0, 1.3)    | 1.1 (0.9, 1.2)    |
| Kiribati                         | 0.2 (0.1, 0.3)    | 0.0 (-0.1, 0.0)   | 0.0 (-0.2, 0.1)   | -0.2 (-0.3, -0.2) | -0.2 (-0.3, -0.1) | -0.3 (-0.4, -0.2) | -0.4 (-0.6, -0.1) | -0.4 (-0.6, -0.1) | -0.3 (-0.5, 0.0)  | 0.2 (0.0, 0.5)    | 0.1 (-0.1, 0.3)   | 0.0 (-0.2, 0.2)   |
| Kuwait                           | 0.9 (-0.1, 1.9)   | 0.9 (-0.1, 1.9)   | 0.2 (-0.5, 0.9)   | 1.5 (-0.1, 3.2)   | -0.7 (-2.0, 0.6)  | -1.2 (-2.3, 0.0)  | 2.9 (1.4, 4.4)    | -1.2 (-2.3, -0.1) | -1.4 (-2.5, -0.4) | 2.6 (1.3, 4.0)    | 0.9 (-0.6, 2.4)   | 0.8 (-0.5, 2.2)   |
| Kyrgyzstan                       | 0.0 (-0.3, 0.4)   | 0.0 (-0.4, 0.5)   | -0.8 (-1.1, -0.5) | -2.7 (-3.7, -1.8) | -2.5 (-3.5, -1.5) | -3.5 (-4.4, -2.6) | -1.3 (-1.7, -0.9) | -1.3 (-1.7, -0.9) | -1.9 (-2.4, -1.4) | -1.9 (-2.6, -1.3) | -2.5 (-3.2, -1.9) | -3.2 (-4.0, -2.4) |
| Lao People's Democratic Republic | 0.8 (0.6, 0.9)    | 0.6 (0.5, 0.7)    | 0.3 (0.3, 0.4)    | -2.1 (-2.2, -2.1) | -2.0 (-2.0, -1.9) | -2.6 (-2.6, -2.5) | -1.0 (-1.2, -0.8) | -0.9 (-1.1, -0.8) | -1.3 (-1.5, -1.1) | 0.7 (0.6, 0.8)    | 0.4 (0.3, 0.5)    | 0.1 (0.0, 0.2)    |
| Latvia                           | -0.7 (-1.3, -0.2) | -0.8 (-1.6, 0.0)  | -1.2 (-2.0, -0.5) | -0.7 (-1.8, 0.4)  | -2.1 (-3.7, -0.6) | -2.4 (-3.8, -0.8) | -0.2 (-0.9, 0.4)  | -2.5 (-3.2, -1.9) | -2.9 (-3.6, -2.3) | 1.0 (-0.2, 2.2)   | -0.3 (-1.4, 0.9)  | -0.5 (-1.6, 0.7)  |
| Lebanon                          | 0.0 (-0.1, 0.1)   | -0.3 (-0.4, -0.2) | -0.3 (-0.4, -0.2) | 0.6 (0.5, 0.7)    | -1.8 (-1.9, -1.7) | -1.8 (-1.9, -1.7) | 3.1 (2.8, 3.3)    | -1.0 (-1.1, -1.0) | -1.1 (-1.2, -0.9) | 3.2 (2.8, 3.5)    | 0.4 (0.1, 0.7)    | 0.5 (0.3, 0.8)    |
| Lesotho                          | 1.9 (1.9, 2.0)    | 1.6 (1.6, 1.7)    | 1.9 (1.8, 1.9)    | 2.2 (2.1, 2.4)    | 2.2 (2.1, 2.4)    | 2.2 (2.1, 2.4)    | 1.7 (1.5, 1.8)    | 1.7 (1.6, 1.8)    | 1.7 (1.5, 1.9)    | 2.8 (2.6, 3.0)    | 2.7 (2.5, 2.8)    | 2.8 (2.6, 3.0)    |

|                  |                   |                   |                   |                   |                   |                   |                   |                   |                   |                   |                   |                   |
|------------------|-------------------|-------------------|-------------------|-------------------|-------------------|-------------------|-------------------|-------------------|-------------------|-------------------|-------------------|-------------------|
| Liberia          | -0.8 (-1.1, -0.5) | -0.7 (-1.1, -0.3) | -1.5 (-1.8, -1.2) | -0.7 (-1.0, -0.5) | -0.6 (-0.9, -0.3) | -1.0 (-1.3, -0.8) | -1.4 (-1.8, -1.0) | -1.2 (-1.7, -0.7) | -1.5 (-1.9, -1.0) | 0.6 (0.3, 0.8)    | 0.3 (0.0, 0.6)    | 0.2 (-0.1, 0.5)   |
| Libya            | 0.0 (-0.1, 0.1)   | -0.2 (-0.4, -0.1) | -0.4 (-0.5, -0.2) | -1.5 (-1.9, -1.0) | -1.6 (-2.0, -1.1) | -1.7 (-2.3, -1.2) | -0.3 (-0.6, -0.1) | -0.7 (-0.9, -0.5) | -1.2 (-1.6, -0.7) | 2.0 (1.4, 2.6)    | 0.8 (0.4, 1.5)    | 0.9 (0.3, 1.5)    |
| Lithuania        | 0.0 (-0.4, 0.4)   | 0.0 (-0.4, 0.4)   | -0.9 (-1.4, -0.4) | -2.7 (-3.6, -1.7) | -3.7 (-4.5, -2.8) | -4.0 (-5.8, -2.1) | -1.6 (-2.4, -0.8) | -3.2 (-3.9, -2.4) | -3.5 (-4.2, -2.8) | 1.1 (-0.8, 3.1)   | 0.8 (-1.8, 3.3)   | 0.5 (-0.5, 1.6)   |
| Luxembourg       | 0.3 (0.1, 0.5)    | 0.3 (0.2, 0.4)    | -0.2 (-0.2, -0.1) | 2.5 (1.9, 3.1)    | -4.0 (-4.2, -3.7) | -3.8 (-4.1, -3.6) | 3.3 (2.8, 3.7)    | -2.0 (-2.2, -1.8) | -1.8 (-2.1, -1.6) | 0.6 (0.2, 0.9)    | -1.1 (-1.5, -0.8) | -1.2 (-1.5, -1.0) |
| Madagascar       | 0.2 (0.1, 0.3)    | 0.1 (0.0, 0.2)    | -0.3 (-0.5, 0.0)  | -1.3 (-1.6, -1.0) | -1.1 (-1.3, -0.9) | -1.8 (-2.1, -1.4) | -0.8 (-1.2, -0.5) | -0.7 (-1.1, -0.3) | -0.9 (-1.4, -0.4) | 1.9 (1.7, 2.0)    | 1.7 (1.6, 1.9)    | 1.7 (1.6, 1.9)    |
| Malawi           | 0.4 (0.2, 0.6)    | 0.2 (0.1, 0.3)    | 0.1 (-0.2, 0.3)   | -2.3 (-2.6, -1.9) | -2.0 (-2.3, -1.6) | -2.9 (-3.4, -2.3) | -0.6 (-1.0, -0.3) | -0.5 (-0.8, -0.2) | -0.7 (-1.1, -0.3) | 0.8 (0.5, 1.0)    | 0.6 (0.5, 0.8)    | 0.5 (0.3, 0.7)    |
| Malaysia         | 0.6 (0.5, 0.7)    | 0.4 (0.3, 0.5)    | 0.2 (0.1, 0.2)    | -0.8 (-1.5, -0.1) | -1.0 (-2.0, -0.1) | -1.2 (-1.8, -0.6) | -0.3 (-0.6, 0.1)  | -0.9 (-1.1, -0.7) | -1.2 (-1.6, -0.7) | 2.1 (1.8, 2.4)    | 1.0 (0.2, 1.8)    | 0.8 (0.6, 1.1)    |
| Maldives         | -0.1 (-0.3, 0.0)  | -0.3 (-0.5, -0.1) | -0.6 (-0.8, -0.4) | -2.8 (-3.2, -2.4) | -3.4 (-3.7, -3.1) | -4.3 (-4.5, -4.1) | -0.7 (-1.2, -0.2) | -2.1 (-2.6, -1.7) | -2.4 (-2.9, -1.9) | 1.7 (1.3, 2.1)    | -0.2 (-0.4, 0.1)  | -0.5 (-0.8, -0.3) |
| Mali             | 0.3 (-0.2, 0.7)   | 0.2 (-0.2, 0.6)   | 0.0 (-0.6, 0.5)   | -0.6 (-0.9, -0.3) | -0.5 (-0.8, -0.2) | -0.7 (-1.1, -0.4) | -0.2 (-0.7, 0.3)  | -0.1 (-0.7, 0.4)  | -0.2 (-0.8, 0.4)  | 0.4 (0.3, 0.5)    | 0.2 (0.1, 0.3)    | 0.1 (0.0, 0.2)    |
| Malta            | 0.5 (0.3, 0.7)    | 0.1 (-0.1, 0.3)   | 0.2 (0.1, 0.3)    | 1.2 (0.8, 1.5)    | -4.0 (-4.2, -3.8) | -3.6 (-3.9, -3.4) | 3.5 (2.9, 4.1)    | -1.6 (-1.7, -1.4) | -1.0 (-1.3, -0.7) | 0.4 (0.2, 0.6)    | -1.2 (-1.4, -0.9) | -1.2 (-1.5, -1.0) |
| Marshall Islands | 0.5 (0.4, 0.5)    | 0.2 (0.1, 0.4)    | 0.3 (0.2, 0.3)    | -0.9 (-1.0, -0.9) | -1.0 (-1.0, -0.9) | -0.8 (-0.9, -0.8) | -0.1 (-0.2, -0.1) | -0.2 (-0.2, -0.1) | -0.1 (-0.1, 0.0)  | -0.3 (-0.4, -0.1) | -0.6 (-0.8, -0.4) | -0.4 (-0.5, -0.2) |
| Mauritania       | -0.3 (-0.5, -0.1) | -0.4 (-0.6, -0.2) | -0.6 (-0.9, -0.4) | -1.0 (-1.2, -0.9) | -0.9 (-1.0, -0.8) | -1.3 (-1.4, -1.1) | -0.6 (-0.9, -0.3) | -0.5 (-0.6, -0.4) | -0.6 (-0.9, -0.3) | 0.1 (0.0, 0.3)    | -0.3 (-0.5, -0.1) | -0.5 (-0.7, -0.3) |

|                                  |                   |                   |                   |                   |                   |                   |                   |                   |                   |                |                   |                  |
|----------------------------------|-------------------|-------------------|-------------------|-------------------|-------------------|-------------------|-------------------|-------------------|-------------------|----------------|-------------------|------------------|
| Mauritius                        | 2.2 (1.2, 3.4)    | 2.0 (0.9, 3.1)    | 1.9 (1.0, 2.9)    | 1.3 (0.1, 2.6)    | 1.2 (-0.1, 2.4)   | 0.7 (-0.5, 2.0)   | 1.2 (0.2, 2.3)    | 0.7 (-0.4, 1.8)   | 0.6 (-0.5, 1.7)   | 1.2 (0.3, 2.1) | 0.1 (-0.9, 1.0)   | 0.4 (-0.4, 1.1)  |
| Mexico                           | 1.0 (0.8, 1.2)    | 0.9 (0.7, 1.2)    | 0.6 (0.4, 0.8)    | -1.2 (-1.7, -0.8) | -1.3 (-1.5, -1.1) | -1.6 (-2.1, -1.1) | 1.3 (1.1, 1.4)    | 0.8 (0.5, 1.0)    | 0.5 (0.3, 0.7)    | 1.8 (1.4, 2.1) | 0.6 (0.4, 0.7)    | 0.4 (0.2, 0.6)   |
| Micronesia (Federated States of) | 0.2 (0.1, 0.2)    | -0.1 (-0.1, 0.0)  | -0.1 (-0.1, 0.0)  | -1.3 (-1.4, -1.2) | -1.3 (-1.3, -1.2) | -1.4 (-1.5, -1.3) | -0.4 (-0.5, -0.4) | -0.4 (-0.5, -0.4) | -0.5 (-0.6, -0.5) | 0.5 (0.4, 0.7) | -0.1 (-0.1, 0.0)  | 0.1 (0.0, 0.1)   |
| Monaco                           | 1.1 (1.1, 1.2)    | 1.0 (0.9, 1.0)    | 0.5 (0.4, 0.5)    | 3.0 (2.7, 3.4)    | -1.6 (-1.7, -1.4) | -1.4 (-1.6, -1.3) | 1.3 (1.1, 1.5)    | -1.0 (-1.1, -0.9) | -1.1 (-1.2, -1.0) | 1.4 (1.3, 1.5) | 0.3 (0.2, 0.5)    | 0.3 (0.2, 0.4)   |
| Mongolia                         | 0.6 (0.3, 0.8)    | 0.3 (0.2, 0.5)    | 0.2 (0.0, 0.4)    | -0.5 (-0.8, -0.3) | -0.4 (-0.6, -0.1) | -0.8 (-1.2, -0.5) | -0.8 (-1.2, -0.4) | -0.8 (-1.2, -0.4) | -1.1 (-1.6, -0.6) | 1.8 (1.5, 2.1) | 0.9 (0.7, 1.2)    | 0.6 (0.3, 0.9)   |
| Montenegro                       | 0.1 (-0.2, 0.5)   | 0.0 (-0.3, 0.3)   | -0.4 (-0.8, 0.0)  | 0.8 (0.3, 1.2)    | -1.1 (-1.3, -0.8) | -1.5 (-1.8, -1.1) | 1.3 (0.6, 2.1)    | -1.3 (-1.9, -0.7) | -1.7 (-2.9, -0.5) | 3.6 (3.3, 3.9) | 2.4 (2.1, 2.8)    | 2.4 (2.1, 2.8)   |
| Morocco                          | 0.8 (0.7, 1.0)    | 0.7 (0.5, 0.9)    | 0.5 (0.4, 0.7)    | -1.1 (-1.3, -0.8) | -0.9 (-1.2, -0.6) | -1.5 (-1.7, -1.3) | -0.3 (-0.8, 0.2)  | -0.2 (-0.7, 0.3)  | -0.7 (-1.3, -0.1) | 1.9 (1.4, 2.5) | 1.1 (0.5, 1.6)    | 1.0 (0.7, 1.3)   |
| Mozambique                       | 1.6 (1.3, 1.9)    | 1.4 (1.1, 1.6)    | 1.4 (1.0, 1.8)    | 0.0 (-0.2, 0.2)   | 0.2 (0.1, 0.4)    | -0.4 (-0.7, -0.2) | 0.7 (0.1, 1.3)    | 0.8 (0.2, 1.3)    | 0.7 (0.0, 1.4)    | 2.0 (1.9, 2.2) | 1.9 (1.7, 2.0)    | 1.9 (1.8, 2.0)   |
| Myanmar                          | 1.3 (1.2, 1.4)    | 1.1 (1.0, 1.2)    | 0.9 (0.7, 1.0)    | -2.6 (-2.6, -2.5) | -2.4 (-2.5, -2.4) | -2.9 (-3.0, -2.8) | -0.4 (-0.6, -0.3) | -0.4 (-0.5, -0.3) | -0.7 (-0.9, -0.4) | 1.1 (1.0, 1.2) | 0.6 (0.5, 0.7)    | 0.3 (0.2, 0.4)   |
| Namibia                          | 1.2 (0.9, 1.6)    | 1.0 (0.7, 1.3)    | 1.1 (0.6, 1.5)    | 0.2 (-0.1, 0.4)   | 0.2 (0.0, 0.4)    | 0.1 (-0.2, 0.3)   | 1.0 (0.4, 1.7)    | 0.9 (0.3, 1.4)    | 1.0 (0.2, 1.7)    | 1.8 (1.6, 2.1) | 1.3 (1.0, 1.5)    | 1.1 (0.7, 1.5)   |
| Nauru                            | -0.2 (-0.2, -0.1) | -0.4 (-0.5, -0.3) | -0.4 (-0.5, -0.3) | -1.1 (-1.2, -1.0) | -1.2 (-1.3, -1.0) | -1.1 (-1.2, -1.0) | -0.2 (-0.3, -0.1) | -0.2 (-0.4, -0.1) | -0.3 (-0.5, -0.1) | 0.4 (0.3, 0.5) | -0.2 (-0.4, -0.1) | -0.1 (-0.2, 0.0) |

|                          |                   |                   |                   |                   |                   |                   |                   |                   |                   |                   |                   |                   |
|--------------------------|-------------------|-------------------|-------------------|-------------------|-------------------|-------------------|-------------------|-------------------|-------------------|-------------------|-------------------|-------------------|
| Nepal                    | 0.5 (0.4, 0.6)    | 0.5 (0.4, 0.5)    | 0.0 (-0.2, 0.1)   | -1.9 (-1.9, -1.8) | -1.6 (-1.7, -1.5) | -2.6 (-2.7, -2.5) | -1.5 (-1.8, -1.3) | -1.4 (-1.6, -1.1) | -1.8 (-2.3, -1.3) | 1.8 (1.7, 1.9)    | 1.3 (1.3, 1.4)    | 1.1 (1.0, 1.1)    |
| Netherlands              | 0.6 (0.2, 1.0)    | 0.7 (0.3, 1.0)    | -0.1 (-0.6, 0.4)  | 0.8 (-0.1, 1.6)   | -4.8 (-5.5, -4.1) | -4.7 (-5.3, -4.0) | 1.4 (0.8, 2.1)    | -1.7 (-2.4, -1.1) | -1.8 (-2.4, -1.1) | -2.8 (-4.7, -0.9) | -4.2 (-6.1, -2.4) | -4.1 (-5.7, -2.6) |
| New Zealand              | -0.1 (-0.3, 0.1)  | 0.0 (-0.2, 0.3)   | -0.3 (-0.5, -0.1) | -0.9 (-1.3, -0.5) | -4.4 (-4.8, -4.1) | -4.4 (-4.8, -4.1) | 1.3 (0.6, 2.1)    | -2.1 (-2.4, -1.7) | -2.1 (-2.6, -1.6) | 1.2 (0.7, 1.8)    | 0.0 (-0.6, 0.6)   | -0.1 (-0.6, 0.4)  |
| Nicaragua                | 0.8 (0.2, 1.5)    | 0.8 (0.1, 1.5)    | 0.1 (-0.1, 0.3)   | 0.2 (-0.9, 1.3)   | 0.2 (-0.9, 1.3)   | -0.6 (-1.7, 0.4)  | 1.4 (1.1, 1.6)    | 1.0 (0.7, 1.3)    | 0.4 (0.2, 0.6)    | 1.3 (0.7, 1.9)    | -0.1 (-1.4, 1.2)  | -0.4 (-0.9, 0.1)  |
| Niger                    | -0.1 (-0.4, 0.2)  | -0.2 (-0.5, 0.1)  | -0.6 (-0.9, -0.2) | -0.5 (-0.8, -0.3) | -0.4 (-0.6, -0.2) | -0.7 (-1.1, -0.4) | 0.0 (-0.4, 0.4)   | 0.0 (-0.4, 0.4)   | 0.1 (-0.4, 0.6)   | 0.8 (0.7, 0.9)    | 0.6 (0.5, 0.7)    | 0.5 (0.4, 0.7)    |
| Nigeria                  | 0.6 (0.3, 0.8)    | 0.4 (0.1, 0.6)    | 0.1 (-0.1, 0.4)   | 0.0 (-0.1, 0.1)   | 0.1 (0.0, 0.2)    | -0.3 (-0.4, -0.1) | -0.1 (-0.2, 0.1)  | -0.1 (-0.3, 0.2)  | -0.2 (-0.3, 0.0)  | 1.1 (0.9, 1.3)    | 0.8 (0.6, 0.9)    | 0.8 (0.6, 1.0)    |
| Niue                     | 0.1 (0.0, 0.1)    | -0.2 (-0.2, -0.1) | -0.2 (-0.2, -0.1) | -1.3 (-1.5, -1.1) | -1.5 (-1.7, -1.4) | -1.7 (-1.8, -1.5) | 0.2 (0.1, 0.3)    | -0.4 (-0.5, -0.4) | -0.4 (-0.5, -0.3) | 0.9 (0.7, 1.1)    | -0.3 (-0.4, -0.2) | -0.3 (-0.4, -0.1) |
| North Macedonia          | -0.3 (-0.5, -0.1) | -0.5 (-0.7, -0.4) | -0.5 (-0.7, -0.4) | -0.2 (-0.6, 0.1)  | -1.5 (-1.8, -1.2) | -1.7 (-2.1, -1.4) | 1.4 (0.9, 2.0)    | -1.0 (-1.5, -0.5) | -1.1 (-1.7, -0.5) | 4.8 (4.5, 5.2)    | 3.2 (2.9, 3.5)    | 3.3 (3.0, 3.6)    |
| Northern Mariana Islands | -2.4 (-2.5, -2.2) | -2.7 (-2.8, -2.5) | -2.4 (-2.6, -2.2) | -3.2 (-4.3, -2.1) | -3.5 (-4.2, -2.8) | -3.4 (-4.1, -2.8) | -1.7 (-2.5, -0.9) | -2.4 (-2.7, -2.1) | -2.4 (-2.7, -2.1) | -0.5 (-1.0, 0.0)  | -1.7 (-1.9, -1.5) | -1.0 (-1.2, -0.8) |
| Norway                   | -0.7 (-0.9, -0.5) | -0.3 (-0.5, -0.1) | -1.1 (-1.3, -0.9) | 0.6 (0.4, 0.9)    | -4.4 (-4.9, -4.0) | -4.6 (-5.0, -4.2) | 1.0 (0.3, 1.6)    | -2.1 (-2.4, -1.8) | -2.3 (-2.6, -2.1) | 0.5 (0.3, 0.7)    | -0.7 (-0.8, -0.6) | -1.0 (-1.1, -0.8) |
| Oman                     | 0.5 (0.4, 0.6)    | 0.3 (0.2, 0.5)    | 0.2 (0.0, 0.3)    | -1.0 (-1.3, -0.8) | -2.0 (-2.3, -1.6) | -2.5 (-2.8, -2.2) | 1.9 (1.5, 2.2)    | -0.6 (-0.7, -0.5) | -0.8 (-1.1, -0.6) | 3.0 (2.6, 3.5)    | 1.2 (1.0, 1.5)    | 0.8 (0.6, 1.1)    |
| Pakistan                 | 1.4 (1.2, 1.5)    | 1.0 (0.8, 1.1)    | 1.1 (1.0, 1.3)    | -0.8 (-0.9, -0.6) | -0.8 (-0.9, -0.7) | -0.9 (-1.1, -0.8) | 1.1 (0.8, 1.4)    | 1.0 (0.7, 1.2)    | 1.1 (0.7, 1.5)    | 1.3 (1.2, 1.4)    | 0.9 (0.9, 1.0)    | 0.9 (0.9, 1.0)    |

|                   |                  |                  |                   |                   |                   |                   |                   |                   |                   |                  |                   |                   |
|-------------------|------------------|------------------|-------------------|-------------------|-------------------|-------------------|-------------------|-------------------|-------------------|------------------|-------------------|-------------------|
| Palau             | 0.2 (0.1, 0.2)   | 0.0 (-0.1, 0.0)  | -0.1 (-0.2, 0.0)  | -0.5 (-0.6, -0.4) | -0.7 (-0.7, -0.6) | -0.8 (-1.0, -0.7) | 0.4 (0.3, 0.5)    | -0.2 (-0.3, -0.1) | -0.2 (-0.4, -0.1) | 1.0 (0.8, 1.1)   | 0.1 (0.1, 0.2)    | 0.1 (0.0, 0.2)    |
| Palestine         | 1.2 (1.1, 1.3)   | 1.1 (0.9, 1.3)   | 0.8 (0.7, 1.0)    | -0.5 (-0.7, -0.3) | -0.6 (-0.7, -0.4) | -1.0 (-1.4, -0.7) | 1.2 (0.8, 1.5)    | 0.7 (0.4, 1.1)    | 0.5 (0.0, 0.9)    | 2.9 (2.6, 3.1)   | 1.8 (1.2, 2.3)    | 1.5 (1.0, 2.0)    |
| Panama            | 0.9 (0.6, 1.2)   | 0.7 (0.4, 0.9)   | 0.5 (0.2, 0.8)    | -1.0 (-1.9, -0.1) | -1.3 (-2.3, -0.4) | -1.5 (-2.3, -0.7) | 0.8 (0.7, 1.0)    | -0.1 (-0.4, 0.2)  | -0.3 (-0.8, 0.1)  | 1.1 (0.5, 1.7)   | 0.0 (-0.7, 0.7)   | -0.4 (-1.0, 0.3)  |
| Papua New Guinea  | 0.4 (0.1, 0.7)   | 0.3 (0.2, 0.4)   | 0.2 (-0.2, 0.6)   | -0.8 (-1.1, -0.5) | -0.7 (-1.0, -0.5) | -0.9 (-1.2, -0.5) | 0.1 (-0.5, 0.6)   | 0.1 (-0.4, 0.6)   | 0.0 (-0.5, 0.6)   | 0.2 (0.1, 0.3)   | 0.0 (-0.1, 0.1)   | 0.0 (-0.1, 0.2)   |
| Paraguay          | 2.4 (2.1, 2.7)   | 2.2 (2.0, 2.5)   | 1.8 (1.5, 2.0)    | 0.9 (0.3, 1.6)    | 0.9 (0.3, 1.6)    | 0.5 (-0.2, 1.1)   | 0.9 (0.5, 1.3)    | 0.7 (0.3, 1.1)    | 0.2 (-0.2, 0.6)   | 3.6 (3.3, 3.9)   | 2.8 (2.5, 3.1)    | 2.7 (2.4, 3.0)    |
| Peru              | 1.1 (0.8, 1.4)   | 1.0 (0.8, 1.3)   | 0.6 (0.4, 0.9)    | -0.5 (-1.6, 0.6)  | -0.5 (-1.6, 0.6)  | -1.0 (-2.1, 0.0)  | 0.4 (-0.1, 0.9)   | -0.1 (-0.6, 0.4)  | -0.3 (-0.9, 0.2)  | 2.5 (1.4, 3.6)   | 1.0 (-0.2, 2.3)   | 0.8 (-0.6, 2.1)   |
| Philippines       | 0.2 (0.0, 0.4)   | -0.2 (-0.3, 0.0) | 0.1 (-0.1, 0.3)   | -1.6 (-1.8, -1.4) | -1.7 (-1.9, -1.5) | -1.6 (-1.8, -1.4) | -0.3 (-0.5, -0.2) | -0.5 (-0.7, -0.3) | -0.4 (-0.6, -0.2) | -0.2 (-0.8, 0.3) | -0.7 (-1.0, -0.4) | -0.4 (-0.7, -0.1) |
| Poland            | 0.9 (0.8, 1.0)   | 0.9 (0.8, 1.0)   | 0.0 (-0.1, 0.1)   | -1.2 (-1.5, -0.8) | -3.2 (-3.6, -2.7) | -3.9 (-4.4, -3.4) | 2.2 (1.9, 2.6)    | -2.1 (-2.5, -1.7) | -2.3 (-2.7, -1.9) | 6.6 (6.3, 7.0)   | 4.6 (4.2, 4.9)    | 4.4 (4.0, 4.8)    |
| Portugal          | 0.8 (0.6, 1.0)   | 0.8 (0.5, 1.0)   | -0.1 (-0.6, 0.3)  | 1.7 (1.2, 2.2)    | -4.1 (-4.5, -3.6) | -4.2 (-4.8, -3.6) | 4.4 (4.0, 4.8)    | -2.3 (-2.9, -1.7) | -2.5 (-2.9, -2.1) | 2.9 (2.2, 3.7)   | 0.8 (0.1, 1.4)    | 0.6 (0.0, 1.3)    |
| Puerto Rico       | -0.2 (-0.7, 0.3) | -0.3 (-0.6, 0.0) | -0.7 (-1.1, -0.4) | -1.5 (-2.9, 0.0)  | -3.5 (-4.7, -2.3) | -3.6 (-4.8, -2.4) | 1.9 (1.6, 2.1)    | -1.7 (-1.9, -1.4) | -1.9 (-2.2, -1.6) | 0.0 (-0.7, 0.8)  | -1.6 (-2.4, -0.8) | -1.4 (-2.2, -0.6) |
| Qatar             | 0.5 (0.0, 1.0)   | 0.4 (-0.2, 1.1)  | -0.4 (-0.7, -0.1) | 1.0 (-1.1, 3.1)   | -0.6 (-3.6, 2.5)  | -1.8 (-2.9, -0.7) | 2.4 (1.7, 3.1)    | -0.8 (-1.4, -0.2) | -1.8 (-2.5, -1.1) | 2.6 (0.8, 4.3)   | 1.1 (0.8, 1.5)    | 0.1 (-1.7, 2.0)   |
| Republic of Korea | 0.8 (0.4, 1.1)   | 0.9 (0.6, 1.3)   | -0.3 (-0.6, 0.1)  | 3.2 (2.5, 3.8)    | -3.0 (-3.2, -2.8) | -3.7 (-4.0, -3.4) | 6.2 (5.8, 6.7)    | -1.4 (-1.7, -1.0) | -1.6 (-1.9, -1.3) | 4.0 (3.7, 4.4)   | 0.5 (0.2, 0.8)    | 0.6 (0.3, 0.8)    |

|                                  |                   |                   |                   |                   |                   |                   |                   |                   |                   |                 |                   |                   |
|----------------------------------|-------------------|-------------------|-------------------|-------------------|-------------------|-------------------|-------------------|-------------------|-------------------|-----------------|-------------------|-------------------|
| Republic of Moldova              | -1.1 (-1.6, -0.7) | -1.2 (-1.6, -0.7) | -1.6 (-2.0, -1.2) | -2.6 (-4.4, -0.7) | -2.8 (-4.9, -0.7) | -3.0 (-4.8, -1.2) | -2.8 (-3.3, -2.4) | -3.6 (-4.1, -3.2) | -3.9 (-4.4, -3.4) | 0.0 (-1.2, 1.1) | -0.9 (-2.2, 0.4)  | -1.2 (-2.5, 0.1)  |
| Romania                          | 0.9 (0.7, 1.1)    | 0.9 (0.7, 1.2)    | 0.2 (0.0, 0.3)    | -0.7 (-1.1, -0.2) | -1.9 (-2.4, -1.4) | -2.7 (-3.1, -2.2) | 1.0 (0.6, 1.3)    | -1.4 (-1.6, -1.2) | -2.1 (-2.6, -1.7) | 3.1 (2.6, 3.7)  | 1.6 (1.0, 2.2)    | 1.1 (0.5, 1.8)    |
| Russian Federation               | -1.1 (-1.7, -0.5) | -1.2 (-1.8, -0.6) | -1.6 (-2.2, -1.0) | 0.9 (-0.8, 2.7)   | -0.2 (-1.6, 1.2)  | -0.8 (-2.3, 0.7)  | 1.0 (0.4, 1.7)    | -1.3 (-1.8, -0.8) | -1.7 (-2.2, -1.2) | 2.4 (1.3, 3.5)  | 1.1 (0.1, 2.1)    | 0.8 (-0.1, 1.8)   |
| Rwanda                           | 1.3 (1.1, 1.5)    | 1.1 (0.9, 1.3)    | 1.1 (0.8, 1.4)    | -1.8 (-2.1, -1.4) | -1.6 (-2.1, -1.2) | -2.0 (-2.5, -1.4) | 0.0 (-0.5, 0.4)   | 0.1 (-0.4, 0.7)   | 0.0 (-0.5, 0.5)   | 1.4 (1.1, 1.7)  | 1.1 (0.9, 1.3)    | 0.9 (0.6, 1.1)    |
| Saint Kitts and Nevis            | 0.8 (0.1, 1.5)    | 0.5 (0.0, 1.0)    | 0.5 (-0.3, 1.2)   | -1.6 (-1.9, -1.3) | -1.8 (-2.1, -1.5) | -2.1 (-2.5, -1.7) | 0.3 (-0.4, 1.1)   | -0.5 (-1.2, 0.2)  | -0.6 (-1.4, 0.1)  | 1.6 (1.0, 2.1)  | 0.5 (-0.2, 1.1)   | 0.5 (0.0, 0.9)    |
| Saint Lucia                      | 1.0 (0.9, 1.2)    | 0.8 (0.5, 1.1)    | 0.7 (0.4, 1.1)    | -2.0 (-2.2, -1.7) | -2.1 (-2.3, -1.8) | -2.1 (-2.3, -2.0) | 0.0 (-0.3, 0.4)   | -0.2 (-0.6, 0.1)  | -0.4 (-0.8, 0.0)  | 0.8 (0.5, 1.1)  | 0.0 (-0.4, 0.4)   | -0.1 (-0.3, 0.2)  |
| Saint Vincent and the Grenadines | 2.2 (2.1, 2.4)    | 2.1 (1.8, 2.4)    | 1.7 (1.2, 2.2)    | -3.6 (-4.0, -3.3) | -3.7 (-4.1, -3.3) | -3.8 (-4.3, -3.3) | 0.8 (0.2, 1.4)    | 0.8 (0.2, 1.4)    | 0.4 (-0.3, 1.0)   | 1.8 (1.5, 2.1)  | 1.4 (1.2, 1.6)    | 1.4 (1.2, 1.6)    |
| Samoa                            | 0.0 (-0.1, 0.1)   | -0.3 (-0.3, -0.2) | -0.4 (-0.4, -0.3) | -0.9 (-0.9, -0.8) | -0.9 (-1.0, -0.9) | -0.9 (-0.9, -0.9) | -0.5 (-0.6, -0.4) | -0.6 (-0.6, -0.6) | -0.7 (-0.8, -0.7) | 0.2 (-0.1, 0.6) | -0.4 (-0.6, -0.2) | -0.2 (-0.4, -0.1) |
| San Marino                       | 0.6 (0.5, 0.7)    | 0.5 (0.4, 0.6)    | 0.3 (0.3, 0.4)    | 2.9 (2.4, 3.5)    | -1.9 (-2.1, -1.8) | -1.7 (-1.9, -1.4) | 2.5 (2.3, 2.6)    | -0.1 (-0.2, 0.0)  | 0.0 (-0.2, 0.1)   | 1.5 (1.4, 1.7)  | 0.0 (-0.1, 0.2)   | 0.3 (0.2, 0.5)    |
| Sao Tome and Principe            | 0.4 (0.2, 0.6)    | 0.4 (0.0, 0.8)    | 0.1 (-0.5, 0.7)   | 0.4 (0.1, 0.7)    | 0.5 (0.2, 0.7)    | 0.2 (-0.2, 0.6)   | -0.7 (-1.0, -0.5) | -0.7 (-0.9, -0.5) | -1.0 (-1.3, -0.7) | 1.6 (1.5, 1.8)  | 1.2 (1.0, 1.4)    | 1.1 (1.0, 1.3)    |

|                 |                   |                   |                   |                   |                   |                   |                   |                   |                   |                |                   |                   |
|-----------------|-------------------|-------------------|-------------------|-------------------|-------------------|-------------------|-------------------|-------------------|-------------------|----------------|-------------------|-------------------|
| Saudi Arabia    | 0.6 (0.4, 0.7)    | -0.1 (-0.2, 0.0)  | -0.1 (-0.2, 0.1)  | 0.1 (0.1, 0.2)    | -1.3 (-1.4, -1.2) | -1.1 (-1.2, -1.0) | 1.5 (1.3, 1.7)    | -1.2 (-1.3, -1.2) | -1.4 (-1.5, -1.3) | 3.2 (2.9, 3.5) | 0.9 (0.7, 1.0)    | 1.1 (1.0, 1.2)    |
| Senegal         | 0.1 (-1.0, 1.3)   | 0.1 (-0.9, 1.1)   | -0.5 (-1.7, 0.8)  | -0.5 (-1.1, 0.1)  | -0.4 (-0.9, 0.1)  | -0.6 (-1.4, 0.1)  | -0.1 (-1.4, 1.2)  | -0.1 (-1.3, 1.1)  | -0.2 (-1.6, 1.2)  | 0.8 (0.2, 1.4) | 0.6 (0.1, 1.1)    | 0.5 (-0.1, 1.1)   |
| Serbia          | 0.5 (0.3, 0.8)    | 0.5 (0.3, 0.6)    | -0.1 (-0.4, 0.2)  | 1.6 (1.3, 1.8)    | 0.0 (-0.3, 0.3)   | -0.5 (-1.1, 0.0)  | 2.4 (1.8, 2.9)    | -0.7 (-1.0, -0.4) | -1.3 (-1.6, -1.1) | 3.5 (2.9, 4.1) | 1.7 (1.2, 2.4)    | 1.4 (0.8, 2.0)    |
| Seychelles      | 0.5 (0.3, 0.8)    | 0.4 (0.2, 0.5)    | 0.2 (0.0, 0.5)    | -1.1 (-1.5, -0.7) | -1.2 (-1.6, -0.8) | -1.4 (-1.6, -1.1) | 0.7 (-1.1, 2.5)   | 0.5 (-1.0, 2.0)   | 0.7 (-1.2, 2.5)   | 0.9 (0.6, 1.2) | 0.0 (-0.2, 0.2)   | -0.2 (-0.4, 0.0)  |
| Sierra Leone    | 0.6 (0.2, 0.9)    | 0.4 (0.1, 0.7)    | 0.1 (-0.3, 0.5)   | -0.1 (-0.3, 0.0)  | -0.1 (-0.3, 0.0)  | -0.1 (-0.3, 0.0)  | 0.2 (-0.2, 0.5)   | 0.2 (-0.2, 0.5)   | 0.2 (-0.2, 0.6)   | 1.0 (0.9, 1.1) | 0.8 (0.6, 0.9)    | 0.7 (0.6, 0.8)    |
| Singapore       | -0.6 (-1.2, -0.1) | -0.6 (-1.1, -0.1) | -1.3 (-1.9, -0.7) | 0.9 (-0.6, 2.5)   | -4.9 (-5.5, -4.3) | -5.0 (-5.6, -4.3) | 3.6 (2.7, 4.6)    | -2.3 (-2.7, -1.9) | -2.2 (-2.7, -1.8) | 1.7 (1.0, 2.4) | -0.2 (-1.1, 0.7)  | -0.4 (-0.8, 0.0)  |
| Slovakia        | -0.3 (-0.5, -0.1) | -0.5 (-0.7, -0.2) | -0.7 (-0.9, -0.4) | -1.6 (-2.2, -1.0) | -4.1 (-4.6, -3.6) | -4.3 (-4.8, -3.8) | 2.6 (2.2, 3.0)    | -1.3 (-1.5, -1.1) | -1.4 (-1.6, -1.1) | 1.4 (1.1, 1.8) | -0.2 (-0.5, 0.1)  | -0.2 (-0.5, 0.2)  |
| Slovenia        | 1.7 (1.3, 2.1)    | 1.7 (1.3, 2.1)    | 0.9 (0.3, 1.4)    | 2.6 (2.4, 2.9)    | -2.9 (-3.2, -2.6) | -3.3 (-3.7, -2.9) | 3.2 (2.9, 3.5)    | -2.4 (-2.9, -1.8) | -2.3 (-2.8, -1.8) | 0.8 (0.0, 1.7) | -1.0 (-1.4, -0.7) | -1.0 (-1.8, -0.3) |
| Solomon Islands | 0.7 (0.5, 0.8)    | 0.4 (0.3, 0.6)    | 0.4 (0.3, 0.6)    | -0.6 (-0.8, -0.4) | -0.6 (-0.8, -0.3) | -0.6 (-0.8, -0.4) | 0.2 (-0.1, 0.4)   | 0.1 (-0.1, 0.3)   | 0.2 (0.0, 0.5)    | 0.7 (0.6, 0.9) | 0.2 (0.0, 0.4)    | 0.3 (0.1, 0.5)    |
| Somalia         | 0.8 (0.7, 1.0)    | 0.6 (0.5, 0.7)    | 0.7 (0.5, 1.0)    | -0.6 (-0.7, -0.5) | -0.4 (-0.5, -0.3) | -0.7 (-0.9, -0.6) | 0.6 (0.3, 1.0)    | 0.6 (0.3, 1.0)    | 0.7 (0.3, 1.0)    | 1.5 (1.4, 1.6) | 1.5 (1.5, 1.6)    | 1.5 (1.4, 1.6)    |
| South Africa    | 0.4 (0.3, 0.5)    | 0.2 (0.1, 0.3)    | 0.1 (-0.2, 0.3)   | -2.1 (-2.7, -1.5) | -2.0 (-2.7, -1.4) | -2.3 (-2.7, -1.9) | -0.6 (-1.0, -0.2) | -0.7 (-0.9, -0.5) | -1.0 (-1.5, -0.6) | 0.6 (0.0, 1.2) | 0.2 (-0.4, 0.8)   | -0.2 (-1.0, 0.5)  |
| South Sudan     | 0.6 (0.4, 0.8)    | 0.4 (0.2, 0.6)    | 0.2 (0.0, 0.5)    | -0.9 (-1.1, -0.7) | -0.7 (-0.9, -0.6) | -1.3 (-1.5, -1.1) | 0.1 (-0.2, 0.4)   | 0.1 (-0.2, 0.3)   | 0.0 (-0.3, 0.3)   | 0.9 (0.8, 1.1) | 0.8 (0.7, 0.9)    | 0.9 (0.7, 1.1)    |

|                            |                   |                   |                   |                   |                   |                   |                   |                   |                   |                   |                   |                   |
|----------------------------|-------------------|-------------------|-------------------|-------------------|-------------------|-------------------|-------------------|-------------------|-------------------|-------------------|-------------------|-------------------|
| Spain                      | 1.7 (1.5, 1.8)    | 1.6 (1.4, 1.7)    | 0.7 (0.5, 0.8)    | 2.3 (1.9, 2.7)    | -4.2 (-4.5, -3.9) | -4.5 (-4.8, -4.1) | 3.7 (3.3, 4.0)    | -1.5 (-1.7, -1.3) | -1.4 (-1.5, -1.2) | 1.9 (1.5, 2.3)    | 0.3 (0.1, 0.5)    | 0.0 (-0.2, 0.3)   |
| Sri Lanka                  | 0.7 (0.3, 1.1)    | 0.5 (0.2, 0.8)    | 0.2 (-0.4, 0.8)   | -1.0 (-1.7, -0.3) | -1.5 (-2.0, -0.9) | -1.8 (-2.5, -1.0) | 0.1 (-0.5, 0.7)   | -1.0 (-1.5, -0.5) | -1.3 (-2.0, -0.5) | 1.7 (1.1, 2.3)    | 0.0 (-0.8, 0.8)   | 0.0 (-0.6, 0.6)   |
| Sudan                      | 1.2 (1.1, 1.3)    | 0.9 (0.8, 1.1)    | 0.9 (0.8, 1.0)    | -1.5 (-1.6, -1.5) | -1.4 (-1.4, -1.3) | -2.2 (-2.3, -2.0) | 0.3 (0.1, 0.5)    | 0.3 (0.1, 0.4)    | 0.1 (-0.2, 0.3)   | 2.2 (2.2, 2.3)    | 1.6 (1.5, 1.6)    | 1.3 (1.3, 1.4)    |
| Suriname                   | 0.9 (0.5, 1.3)    | 0.9 (0.2, 1.5)    | 0.5 (0.1, 0.9)    | -0.8 (-1.5, -0.1) | -0.8 (-1.4, -0.1) | -0.9 (-1.8, 0.0)  | -0.3 (-1.0, 0.4)  | -0.3 (-1.1, 0.4)  | -0.4 (-0.9, 0.2)  | 2.5 (1.7, 3.3)    | 1.9 (1.2, 2.7)    | 2.0 (1.1, 2.8)    |
| Sweden                     | 0.4 (0.3, 0.6)    | 0.3 (0.1, 0.5)    | -0.2 (-0.4, 0.0)  | 0.2 (-0.7, 1.2)   | -4.5 (-5.3, -3.8) | -4.6 (-5.4, -3.8) | 0.3 (-0.2, 0.9)   | -2.6 (-3.1, -2.0) | -2.4 (-2.7, -2.1) | 0.8 (0.7, 0.9)    | 0.0 (-0.2, 0.1)   | -0.3 (-0.6, 0.1)  |
| Switzerland                | -0.8 (-1.3, -0.3) | -1.1 (-1.6, -0.5) | -1.8 (-2.1, -1.5) | -0.3 (-0.8, 0.1)  | -5.1 (-5.3, -4.8) | -5.3 (-5.7, -4.9) | 0.3 (-0.2, 0.9)   | -3.5 (-4.0, -3.0) | -3.7 (-4.2, -3.2) | -1.5 (-2.0, -1.0) | -2.4 (-2.8, -2.1) | -2.6 (-3.1, -2.2) |
| Syrian Arab Republic       | -0.1 (-0.2, 0.1)  | -0.3 (-0.4, -0.2) | -0.4 (-0.5, -0.2) | -2.4 (-2.7, -2.0) | -2.5 (-2.7, -2.2) | -2.8 (-3.2, -2.5) | -0.2 (-0.6, 0.2)  | -0.9 (-1.2, -0.6) | -1.1 (-1.5, -0.6) | 1.6 (1.3, 1.9)    | 0.3 (0.1, 0.4)    | 0.1 (-0.1, 0.3)   |
| Taiwan (Province of China) | 3.8 (2.6, 4.9)    | 3.8 (2.6, 4.9)    | 2.9 (2.3, 3.5)    | 2.5 (1.9, 3.2)    | -1.0 (-1.4, -0.6) | -1.7 (-2.2, -1.2) | 6.5 (5.6, 7.3)    | 1.0 (0.2, 1.8)    | 1.2 (0.4, 2.0)    | 1.7 (1.2, 2.1)    | -0.1 (-0.6, 0.4)  | -0.3 (-0.8, 0.1)  |
| Tajikistan                 | -0.4 (-0.6, -0.2) | -0.4 (-0.6, -0.3) | -0.9 (-1.1, -0.8) | -2.6 (-2.9, -2.3) | -2.4 (-2.8, -1.9) | -3.3 (-3.5, -3.1) | -1.2 (-1.6, -0.7) | -1.0 (-1.4, -0.6) | -1.6 (-2.0, -1.2) | 1.0 (0.2, 1.7)    | 0.9 (0.3, 1.5)    | 0.0 (-0.5, 0.6)   |
| Thailand                   | 3.1 (2.9, 3.4)    | 3.0 (2.7, 3.3)    | 2.6 (2.3, 2.9)    | 1.5 (0.7, 2.3)    | 1.0 (0.3, 1.8)    | 1.1 (0.5, 1.6)    | 2.3 (2.0, 2.6)    | 1.1 (0.8, 1.4)    | 1.1 (0.9, 1.4)    | 2.4 (1.8, 3.1)    | 1.0 (0.4, 1.7)    | 1.0 (0.8, 1.3)    |
| Timor-Leste                | 1.3 (0.9, 1.7)    | 1.0 (0.7, 1.3)    | 0.8 (0.4, 1.2)    | -1.2 (-1.5, -0.8) | -1.0 (-1.2, -0.7) | -1.6 (-2.0, -1.3) | -0.2 (-0.6, 0.2)  | -0.1 (-0.3, 0.2)  | -0.5 (-1.0, -0.1) | 2.2 (2.0, 2.4)    | 1.8 (1.7, 2.0)    | 1.5 (1.3, 1.7)    |
| Togo                       | 0.4 (0.1, 0.7)    | 0.3 (0.0, 0.7)    | -0.1 (-0.5, 0.3)  | -0.5 (-0.7, -0.3) | -0.5 (-0.7, -0.3) | -0.6 (-0.8, -0.3) | -0.1 (-0.4, 0.2)  | -0.1 (-0.3, 0.2)  | -0.1 (-0.4, 0.2)  | 0.6 (0.4, 0.9)    | 0.5 (0.2, 0.7)    | 0.4 (0.1, 0.6)    |



|                             |                   |                   |                   |                   |                   |                   |                   |                   |                   |                 |                   |                   |
|-----------------------------|-------------------|-------------------|-------------------|-------------------|-------------------|-------------------|-------------------|-------------------|-------------------|-----------------|-------------------|-------------------|
| Tokelau                     | 0.0 (-0.1, 0.1)   | -0.2 (-0.3, 0.0)  | -0.3 (-0.5, -0.1) | -1.9 (-2.0, -1.7) | -1.9 (-2.0, -1.7) | -2.0 (-2.1, -1.8) | -0.4 (-0.5, -0.2) | -0.5 (-0.6, -0.3) | -0.6 (-0.9, -0.4) | 0.6 (0.4, 0.8)  | -0.4 (-0.5, -0.3) | -0.3 (-0.4, -0.2) |
| Tonga                       | 0.6 (0.5, 0.8)    | 0.4 (0.3, 0.6)    | 0.5 (0.4, 0.6)    | -0.9 (-1.1, -0.7) | -0.9 (-1.1, -0.7) | -0.9 (-1.1, -0.7) | 0.2 (0.0, 0.4)    | 0.2 (-0.1, 0.5)   | 0.1 (-0.1, 0.3)   | 0.3 (-0.2, 0.8) | -0.2 (-0.6, 0.2)  | -0.1 (-0.4, 0.3)  |
| Trinidad and Tobago         | 0.1 (-0.2, 0.3)   | 0.0 (-0.2, 0.2)   | -0.2 (-0.4, 0.0)  | -2.3 (-3.0, -1.6) | -2.4 (-3.0, -1.7) | -2.3 (-3.0, -1.7) | -1.2 (-1.4, -0.9) | -1.4 (-1.9, -0.8) | -1.5 (-2.1, -0.9) | 1.0 (0.3, 1.7)  | 0.1 (-0.5, 0.8)   | 0.2 (-0.5, 0.9)   |
| Tunisia                     | 0.2 (0.1, 0.2)    | 0.0 (0.0, 0.1)    | -0.4 (-0.4, -0.3) | -0.6 (-0.8, -0.5) | -1.3 (-1.4, -1.2) | -2.0 (-2.0, -1.9) | 0.6 (0.5, 0.7)    | -1.2 (-1.3, -1.0) | -1.6 (-1.8, -1.5) | 2.5 (2.3, 2.7)  | 0.6 (0.4, 0.8)    | 0.7 (0.5, 0.8)    |
| Turkey                      | -0.5 (-0.6, -0.3) | -0.6 (-0.7, -0.4) | -1.1 (-1.3, -0.9) | -3.5 (-3.9, -3.1) | -4.0 (-4.7, -3.3) | -5.0 (-5.4, -4.5) | -0.3 (-1.1, 0.5)  | -2.1 (-2.7, -1.6) | -2.5 (-3.1, -1.8) | 1.9 (1.5, 2.3)  | 0.1 (-0.2, 0.4)   | -0.4 (-0.8, 0.0)  |
| Turkmenistan                | 0.2 (-0.4, 0.9)   | 0.1 (-0.5, 0.8)   | -0.3 (-0.8, 0.2)  | -1.3 (-2.2, -0.3) | -1.2 (-2.1, -0.3) | -1.9 (-2.7, -1.0) | -0.8 (-1.2, -0.5) | -1.0 (-1.3, -0.7) | -1.3 (-1.7, -1.0) | 1.6 (0.9, 2.4)  | 0.9 (0.4, 1.4)    | 0.4 (-0.2, 1.0)   |
| Tuvalu                      | 0.0 (-0.1, 0.1)   | -0.2 (-0.2, -0.1) | -0.4 (-0.5, -0.3) | -1.9 (-2.0, -1.7) | -1.8 (-1.9, -1.7) | -2.0 (-2.1, -1.9) | -1.0 (-1.1, -0.8) | -1.0 (-1.1, -0.8) | -1.3 (-1.5, -1.1) | 0.1 (0.0, 0.2)  | -0.6 (-0.7, -0.5) | -0.4 (-0.5, -0.3) |
| Uganda                      | 1.1 (0.7, 1.4)    | 0.8 (0.5, 1.1)    | 1.0 (0.6, 1.4)    | -1.5 (-2.0, -1.1) | -1.5 (-1.8, -1.1) | -1.7 (-2.2, -1.2) | -0.1 (-0.6, 0.5)  | -0.1 (-0.6, 0.3)  | 0.1 (-0.4, 0.7)   | 1.7 (1.5, 2.0)  | 1.5 (1.3, 1.7)    | 1.4 (1.2, 1.6)    |
| Ukraine                     | -1.5 (-2.3, -0.7) | -1.6 (-2.4, -0.8) | -2.3 (-3.3, -1.3) | -0.3 (-1.4, 0.8)  | -1.4 (-2.3, -0.5) | -1.6 (-2.8, -0.5) | -1.3 (-1.9, -0.8) | -2.6 (-3.4, -1.9) | -3.1 (-3.9, -2.3) | 0.6 (0.2, 0.9)  | -0.3 (-0.9, 0.3)  | -0.4 (-1.0, 0.2)  |
| United Arab Emirates        | -0.1 (-0.4, 0.2)  | -0.2 (-0.6, 0.1)  | -0.3 (-0.5, -0.1) | -2.7 (-3.3, -2.1) | -2.8 (-3.5, -2.1) | -2.8 (-3.2, -2.3) | -0.2 (-0.7, 0.3)  | -0.6 (-1.1, 0.0)  | -0.8 (-1.2, -0.5) | 1.3 (0.3, 2.3)  | 0.6 (-0.5, 1.7)   | 0.4 (-0.6, 1.4)   |
| United Kingdom              | 0.1 (-0.1, 0.3)   | 0.3 (0.2, 0.4)    | -0.3 (-0.4, -0.2) | 0.2 (-0.2, 0.7)   | -4.2 (-4.6, -3.8) | -4.3 (-4.6, -4.0) | 1.0 (0.7, 1.2)    | -2.0 (-2.2, -1.7) | -2.2 (-2.5, -1.8) | 0.4 (0.1, 0.8)  | -0.5 (-0.8, -0.2) | -0.7 (-1.0, -0.5) |
| United Republic of Tanzania | 1.5 (1.2, 1.7)    | 1.2 (1.0, 1.4)    | 1.3 (0.9, 1.6)    | -0.3 (-0.5, -0.1) | -0.2 (-0.3, -0.1) | -0.5 (-0.9, -0.2) | 0.8 (0.5, 1.1)    | 0.8 (0.5, 1.1)    | 0.8 (0.5, 1.2)    | 1.8 (1.7, 1.9)  | 1.5 (1.4, 1.6)    | 1.5 (1.4, 1.7)    |

|                                    |                 |                  |                   |                   |                   |                   |                   |                   |                   |                  |                   |                   |
|------------------------------------|-----------------|------------------|-------------------|-------------------|-------------------|-------------------|-------------------|-------------------|-------------------|------------------|-------------------|-------------------|
| United States of America           | 0.6 (0.5, 0.7)  | 0.5 (0.4, 0.6)   | 0.0 (-0.2, 0.2)   | -1.7 (-2.0, -1.4) | -3.8 (-4.1, -3.5) | -4.4 (-4.7, -4.0) | -0.3 (-0.6, -0.1) | -1.0 (-1.2, -0.9) | -1.4 (-1.6, -1.2) | -0.4 (-0.7, 0.0) | -0.8 (-0.9, -0.6) | -1.1 (-1.2, -1.0) |
| United States Virgin Islands       | 0.0 (-0.1, 0.1) | -0.1 (-0.3, 0.1) | -0.5 (-0.7, -0.3) | -1.6 (-1.8, -1.3) | -1.7 (-2.0, -1.5) | -2.2 (-2.6, -1.8) | -1.8 (-2.4, -1.2) | -2.2 (-2.8, -1.6) | -2.5 (-3.3, -1.8) | 1.1 (0.9, 1.4)   | 0.4 (0.1, 0.8)    | 0.4 (0.0, 0.7)    |
| Uruguay                            | 0.1 (-0.1, 0.3) | -0.1 (-0.3, 0.1) | -0.4 (-0.8, 0.0)  | -2.2 (-3.0, -1.4) | -2.6 (-3.4, -1.9) | -2.9 (-3.6, -2.2) | -0.4 (-0.8, 0.0)  | -1.5 (-1.8, -1.2) | -1.8 (-2.2, -1.4) | 1.2 (0.6, 1.8)   | 0.2 (-0.6, 1.0)   | 0.2 (-0.3, 0.7)   |
| Uzbekistan                         | 0.1 (-0.1, 0.4) | 0.0 (-0.2, 0.2)  | -0.2 (-0.5, 0.0)  | -0.4 (-0.7, -0.1) | -0.3 (-0.7, 0.2)  | -1.0 (-1.5, -0.5) | -0.6 (-0.9, -0.3) | -0.8 (-1.0, -0.6) | -1.0 (-1.2, -0.8) | 1.7 (1.3, 2.0)   | 1.0 (0.5, 1.5)    | 0.4 (-0.1, 0.9)   |
| Vanuatu                            | 0.8 (0.6, 1.0)  | 0.5 (0.3, 0.7)   | 0.6 (0.4, 0.8)    | -0.7 (-0.9, -0.4) | -0.7 (-0.9, -0.4) | -0.6 (-0.9, -0.3) | 0.5 (0.1, 0.9)    | 0.4 (0.2, 0.7)    | 0.5 (0.0, 1.1)    | 0.2 (-0.1, 0.4)  | -0.1 (-0.4, 0.1)  | 0.2 (-0.1, 0.5)   |
| Venezuela (Bolivarian Republic of) | 0.8 (0.4, 1.2)  | 0.6 (0.2, 1.1)   | 0.5 (0.3, 0.7)    | -2.2 (-2.8, -1.5) | -2.3 (-2.9, -1.7) | -2.5 (-3.2, -1.8) | 0.4 (-0.5, 1.3)   | -0.3 (-1.0, 0.4)  | -0.7 (-1.7, 0.2)  | 0.6 (-0.4, 1.6)  | -0.4 (-0.9, 0.2)  | -0.6 (-1.4, 0.2)  |
| Viet Nam                           | 0.9 (0.8, 1.0)  | 0.7 (0.6, 0.8)   | 0.5 (0.5, 0.6)    | 0.2 (0.1, 0.2)    | 0.1 (0.0, 0.1)    | -0.2 (-0.3, -0.1) | 0.0 (-0.1, 0.1)   | -0.5 (-0.6, -0.5) | -0.6 (-0.7, -0.6) | 2.3 (2.2, 2.5)   | 1.1 (1.1, 1.2)    | 0.9 (0.8, 1.0)    |
| Yemen                              | 1.2 (1.0, 1.4)  | 1.0 (0.8, 1.1)   | 1.1 (1.0, 1.2)    | -1.0 (-1.2, -0.9) | -1.0 (-1.1, -0.8) | -1.2 (-1.4, -1.1) | 0.6 (0.4, 0.8)    | 0.7 (0.5, 0.9)    | 0.6 (0.3, 0.8)    | 1.8 (1.6, 2.0)   | 1.3 (1.2, 1.4)    | 1.2 (1.2, 1.3)    |
| Zambia                             | 0.9 (0.8, 1.0)  | 0.7 (0.5, 0.9)   | 0.6 (0.3, 0.8)    | -1.0 (-1.2, -0.9) | -0.8 (-1.0, -0.7) | -1.5 (-1.7, -1.3) | -0.1 (-0.3, 0.1)  | 0.0 (-0.2, 0.2)   | -0.1 (-0.5, 0.2)  | 1.9 (1.7, 2.0)   | 1.5 (1.3, 1.6)    | 1.5 (1.3, 1.7)    |
| Zimbabwe                           | 0.6 (0.1, 1.1)  | 0.4 (-0.1, 0.8)  | 0.6 (0.0, 1.2)    | 0.3 (0.0, 0.6)    | 0.2 (-0.1, 0.6)   | 0.5 (0.1, 1.0)    | 0.7 (0.3, 1.0)    | 0.6 (0.3, 1.0)    | 0.8 (0.4, 1.3)    | 0.5 (0.1, 0.9)   | 0.6 (0.2, 0.9)    | 0.6 (0.2, 1.0)    |

Abbreviations: AAPC, average annual percentage change; DALY, disability-adjusted life year; CI, confidence interval; AML, acute myeloid leukemia; CML,

chronic myeloid leukemia; ALL, acute lymphoblastic leukemia; CLL, chronic lymphocytic leukemia.
