# Supplementary material for: The Global Burden of Leukemia and Its Attributable Factors in 204 Countries and Territories: Findings from the Global Burden of Disease 2019 Study and Projections to 2030
Source: Hindawi journal article supplement (doi:10.1155/2022/1612702), 2022-04-25

(A)

Acute myeloid leukemia

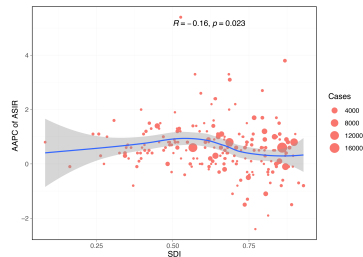

Acute lymphoblastic leukemia

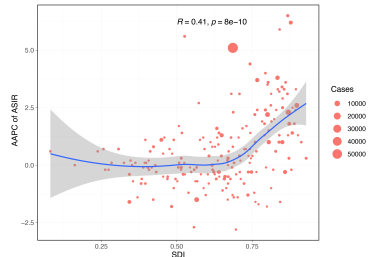

Chronic myeloid leukemia

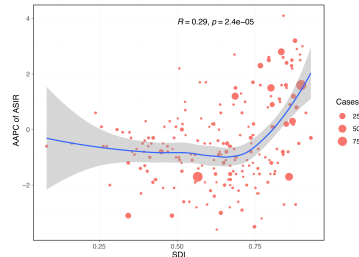

Chronic lymphocytic leukemia

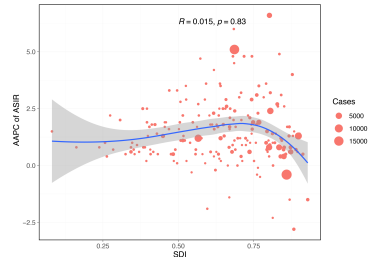

(B)

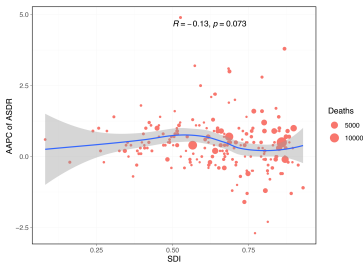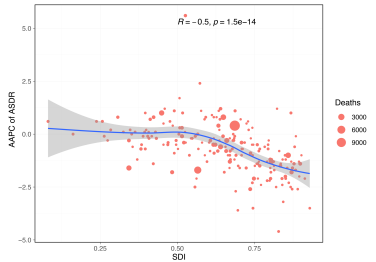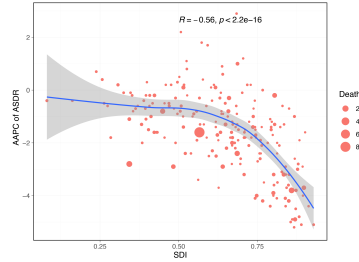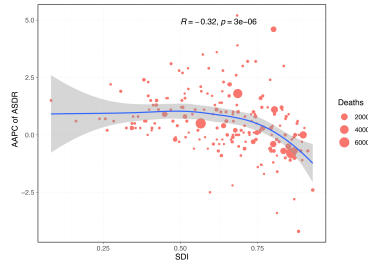

(C)

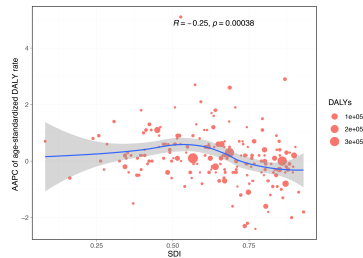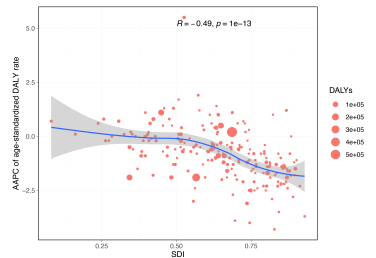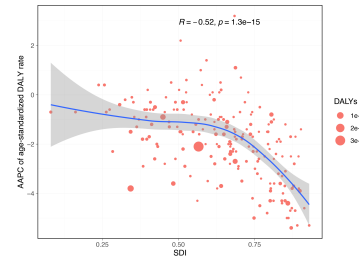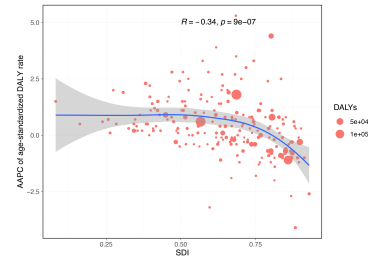

Supplement: f1 [file 1612702.f1.zip]
