# Supplementary material for: The Global Burden of Leukemia and Its Attributable Factors in 204 Countries and Territories: Findings from the Global Burden of Disease 2019 Study and Projections to 2030
Source: Hindawi journal article supplement (doi:10.1155/2022/1612702), 2022-04-25
Supplement: f1 [file 1612702.f1.zip]

## **Supplementary information**

**Supplementary Table 1.** The numbers, age-standardized rates, and AAPCs in incidence, death and DALYs for leukemia.

**Supplementary Table 2.** The numbers, age-standardized rates, and AAPCs in incidence, death and DALYs for leukemia in 204 countries and territories.

**Supplementary Table 3.** The AAPCs (95% CI) of ASIR, ASDR and age-standardized DALY rate due to 4 leukemia subtypes from 1990 to 2019.

**Supplementary Table 4.** The AAPCs of ASIR, ASDR and age-standardized DALY rate due to 4 leukemia subtypes from 1990 to 2019 in 204 countries/territories.

**Supplementary Figure 1.** Proportional distribution of incident cases, deaths and DALYs by age group.

**Supplementary Figure 2.** Radar maps of incident cases (A), deaths (B), DALYs (C) among SDI quintiles due to 4 subtypes of leukemia across different age groups.

**Supplementary Figure 3.** The correlation between AAPC of ASIR (A), ASDR (B), age-standardized DALY rate (C) and SDI for 4 leukemia subtypes in 2019.

**Supplementary Figure 4.** Chordal graphs of risk factors contributing to leukemia-related deaths (A) and DALYs (B) by sex.

**Supplementary Figure 5.** Chordal graphs of risk factors contributing to leukemia-related deaths (A) and DALYs (B) among different age groups.
